# Supplementary material
Source: PubMed Central journal article supplement (PMC7019021)
Supplement: mmc1.pdf [file mmc1.pdf]

**Biophysical Journal, Volume 117**

**Supplemental Information**

**Interfacial Binding Sites for Cholesterol on TRP Ion Channels**

**Anthony G. Lee**

Figure S1

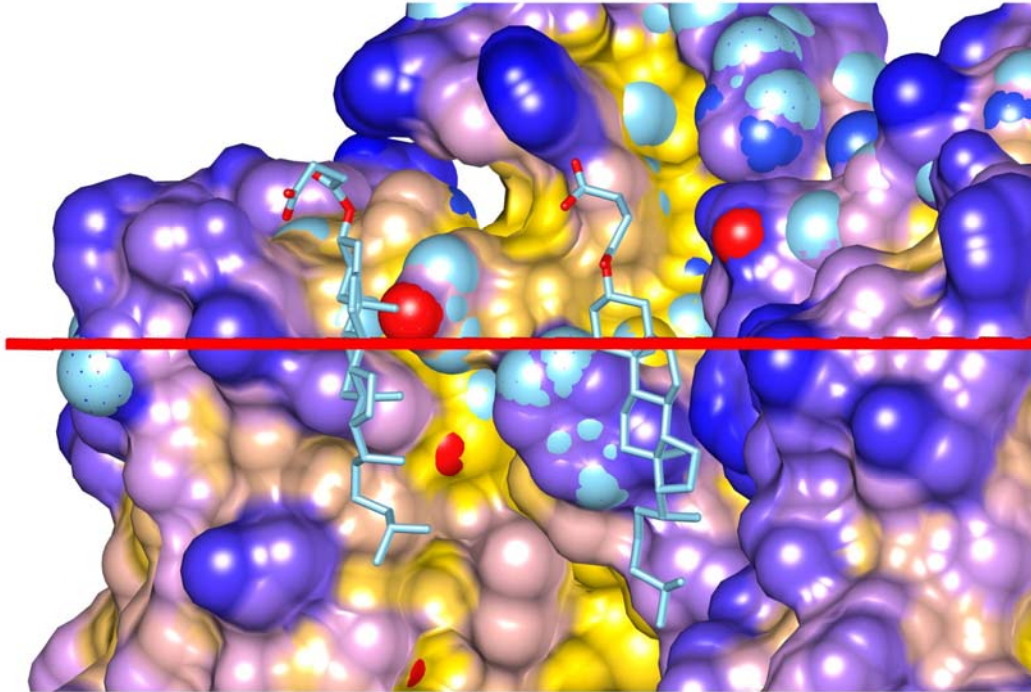

FIGURE S1 CHS molecules A1205 and D1203 bound on the EC side of the TRPM4 6bwi structure (see Table 1). The surface is coloured by depth with residues coloured by polarity (red, acidic; light blue, basic). As shown, the hydrophobic moieties of the CHS molecules are not located in hollows and the succinate moieties are located well above the EC surface and too distant from the protein surface to be involved in charge or hydrogen bonding interactions with the surface.

Figure S2

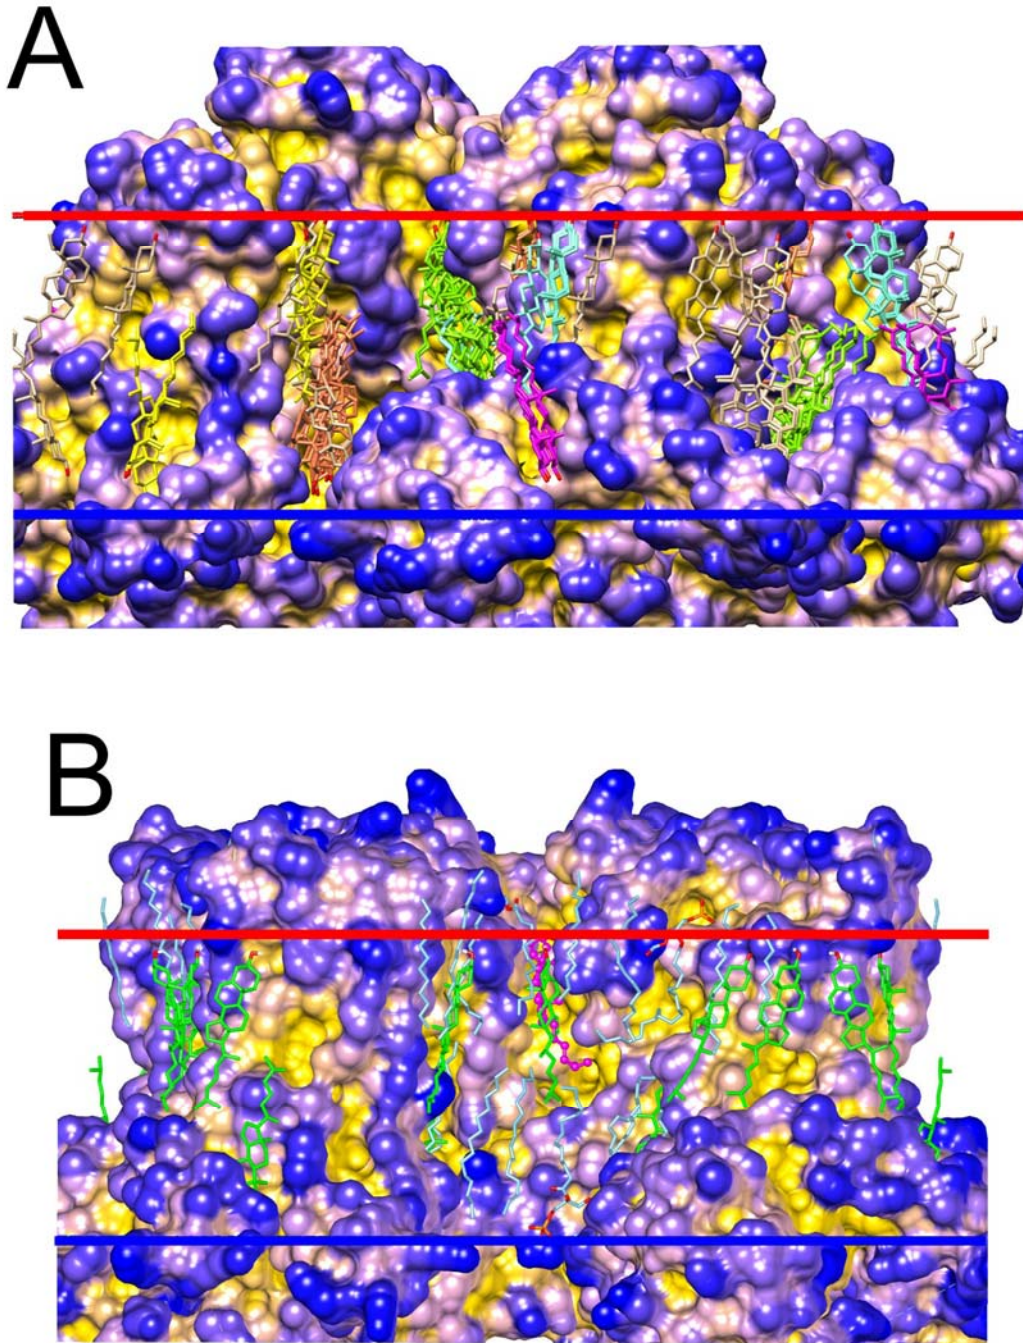

FIGURE S2 (A) Clusters of docked cholesterol for eight TRPM4 structures in the closed state, aligned to 6BQR and coloured as in Fig. 3. (B) Docking poses for sea anemone TRPM2 in the closed state (6CO7). Resolved cholesterol (*ball and stick, magenta*), and phospholipids and fatty acyl chains (*lines, blue*) are shown together with docked cholesterol (*lines, green*).

Figure S3

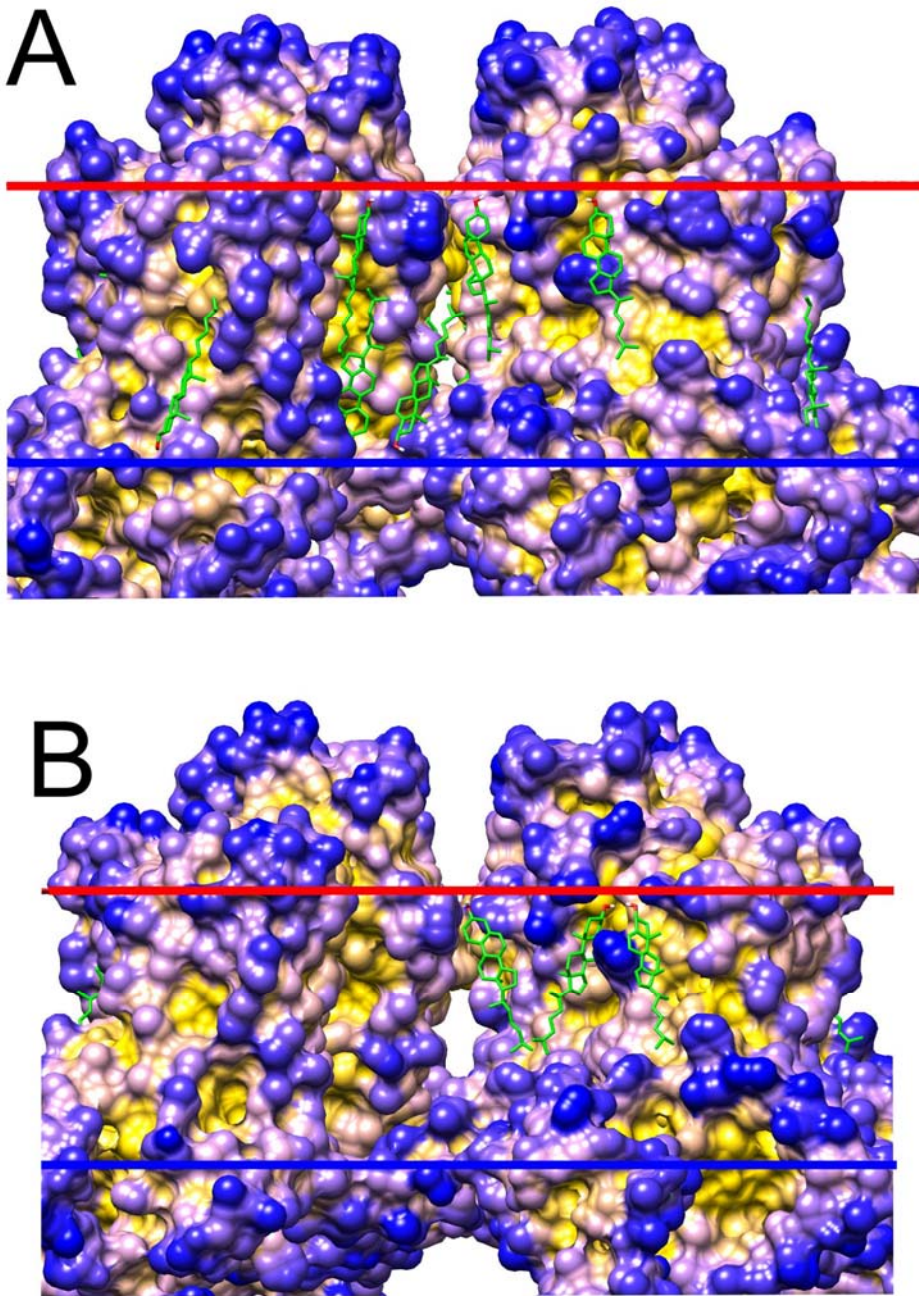

FIGURE S3 Cholesterol docking poses for zebra fish TRPM2 in (A) the closed (6DRK), and (B) the open state (6DRJ), with docked cholesterol (*lines, green*).

Figure S4

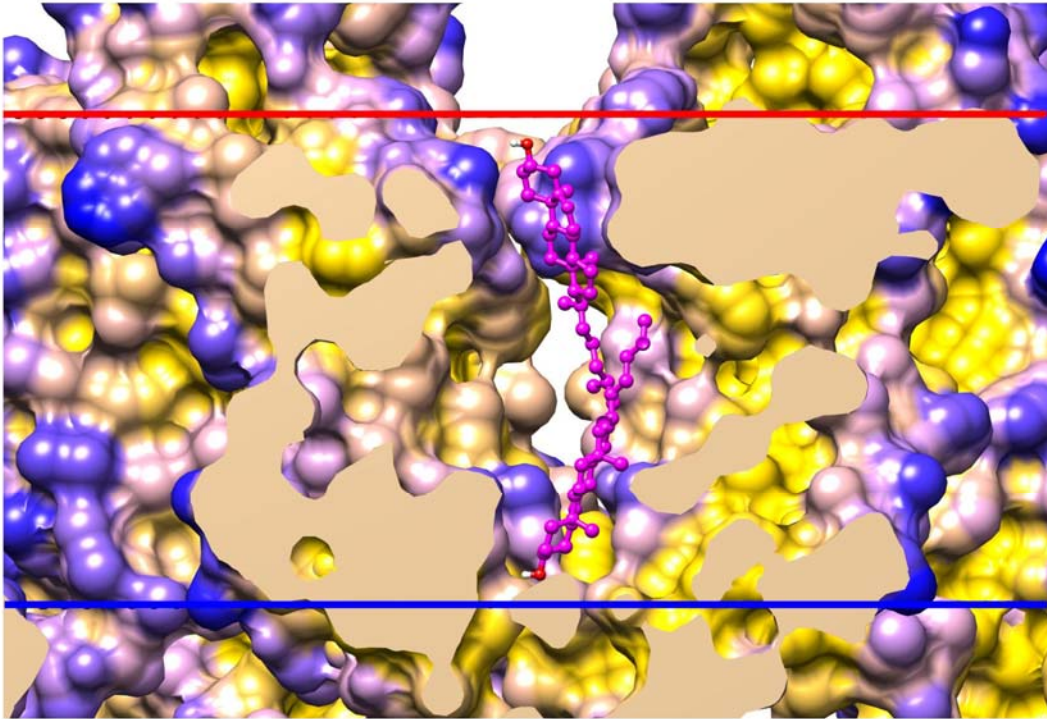

FIGURE S4 A cutaway view of cholesterol docking to zebra fish TRPM2 in the closed form (6DRK). The two cholesterol molecules docking in the central ion-conducting pore are shown in ball and stick (*magenta*), the view being as in Fig. S3 A.

Figure S5

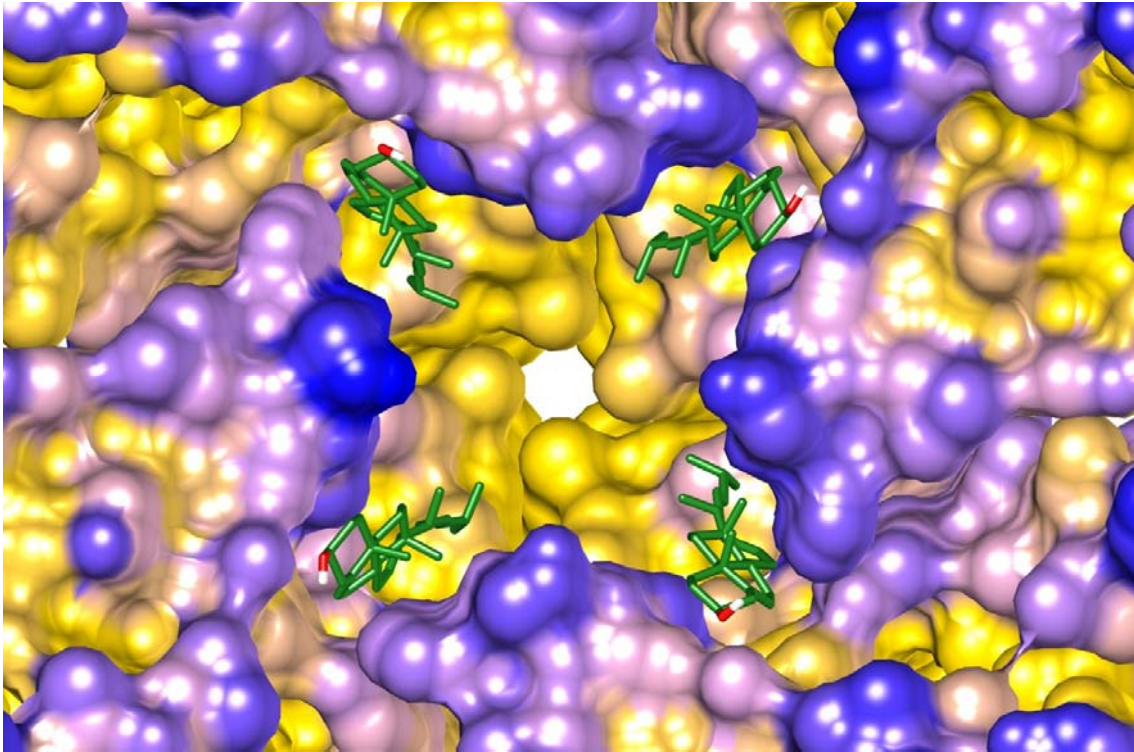

FIGURE S5. Cholesterol docking in the central pore of TRPM8 (6NR2) on the EC side, viewed from the EC side. The four docking poses in the central pore, located with their -OH groups close to the EC interface, are shown in green (*lines*).

Figure S6

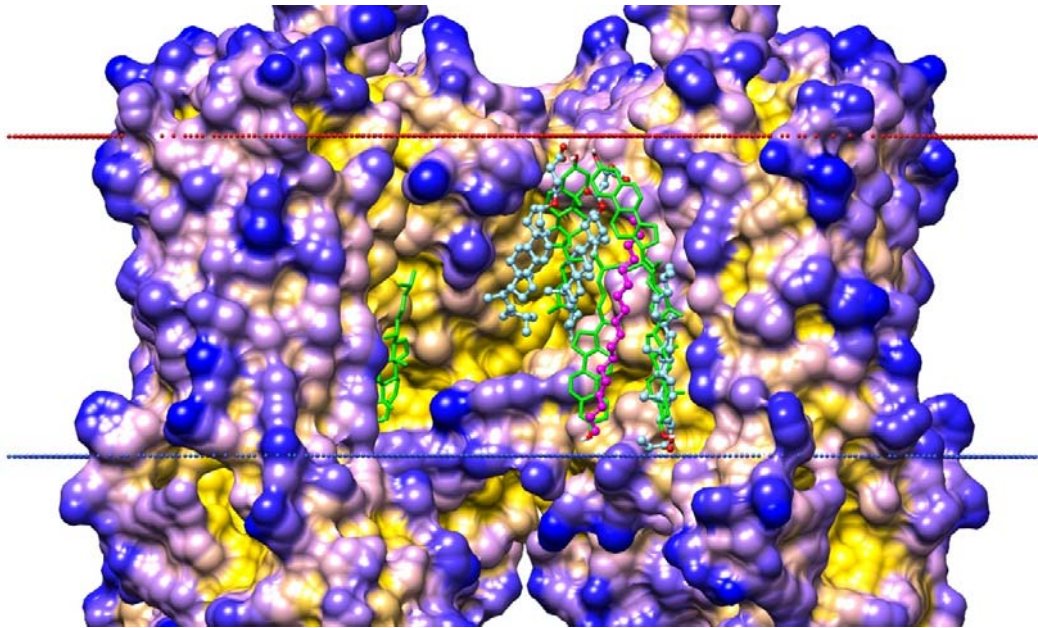

FIGURE S6 Cholesterol docking on TRPML3 (5W3S). Bound CHS (*ball and stick, blue*) and a lipid fatty acyl chain (*ball and stick, magenta*) are shown together with cholesterol docking poses (*line, green*).

Figure S7

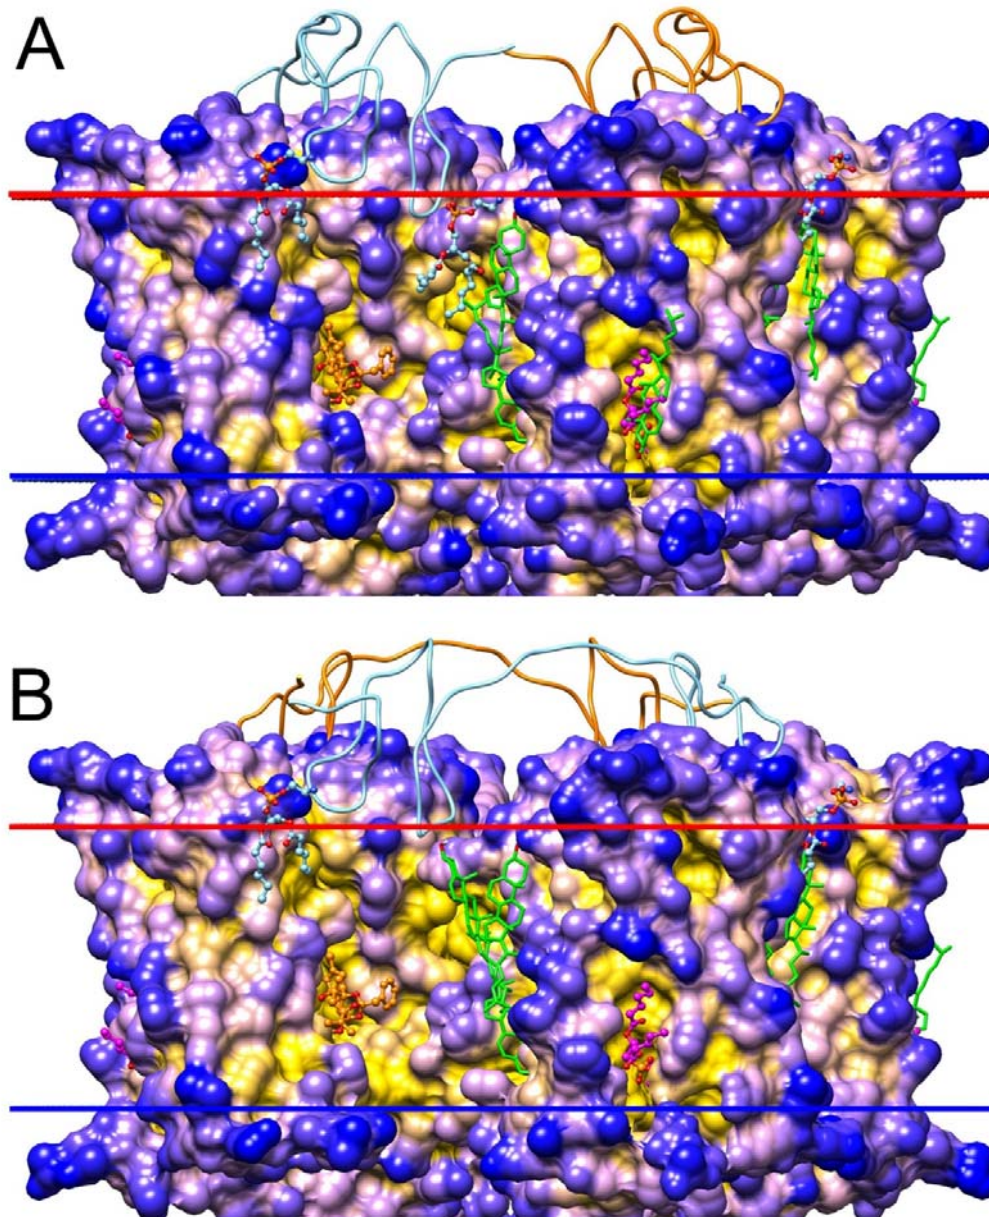

FIGURE S7 Binding of phospholipids and cholesterol to TRPV1 in the open state (5IRX), bound to bivalent toxin DkTx and agonist resiniferatoxin. The two copies of the bound DkTx toxin are shown as ribbons (*blue* or *orange*) with resolved PE on the EC side (*ball and stick, blue*) and PC on the IC side (*ball and stick, magenta*) and resiniferatoxin (*ball and stick, orange*) bound in the central cleft. Docked cholesterol is shown as lines (*green*). (A) shows DkTx (*blue*) bound with its C-terminal end buried in the deep central cleft and (B) shows a view rotated by 90° about the z axis, showing DkTx (*blue*) bound with its N-terminal end in the deep central cleft.



Table S1 Interfacial binding sites for cholesterol on TRP channels

| PDB <sup>a</sup>                           | E <sup>b</sup> | Local Residues <sup>c</sup>                                                                                                      |
|--------------------------------------------|----------------|----------------------------------------------------------------------------------------------------------------------------------|
| TRPA1                                      |                |                                                                                                                                  |
| TRPA1, Human, 3j9p                         |                |                                                                                                                                  |
| 3j9p_EC                                    | -13.3          | Thr874.A, Phe877.A, Ile878.A, Leu902.A, Ile906.A, Phe909.A, Val935.D, Phe938.D, Ala939.D, Val942.D, Ile946.D                     |
|                                            | -13.2          | Val935.A, Phe938.A, Ala939.A, Val942.A, Ile946.A, Thr874.B, Phe877.B, Ile878.B, Leu902.B, Ile906.B, Phe909.B                     |
|                                            | -12.5          | Val935.A, Leu936.A, Val806.B, Leu807.B, Ile810.B, Leu830.B, Cys834.B, Ile837.B, Phe841.B                                         |
|                                            | -12.9          | Phe879.A, Leu882.A, Ser900.A, Pro901.A, Leu902.A, Ile731.B, Val738.B, Trp843.B                                                   |
|                                            | -12.5          | Phe879.B, Leu882.B, Pro901.B, Leu902.B, Leu730.C, Ile731.C, Thr734.C, Val738.C, Trp843.C                                         |
|                                            | -13.3          | Val935.B, Phe938.B, Ala939.B, Val942.B, Ile946.B, Thr874.C, Phe877.C, Ile878.C, Leu902.C, Ile906.C, Phe909.C                     |
|                                            | -13.3          | Val935.C, Phe938.C, Ala939.C, Val942.C, Ile946.C, Thr874.D, Phe877.D, Ile878.D, Leu902.D, Ile906.D, Phe909.D                     |
|                                            | -12.9          | Ile731.A, Val738.A, Trp843.A, Phe879.D, Leu882.D, Ser900.D, Pro901.D, Leu902.D, Ile905.D                                         |
|                                            | -12.4          | Val935.B, Leu936.B, Val806.C, Leu807.C, Ile810.C, Leu830.C, Cys834.C, Ile837.C, Phe841.C                                         |
|                                            | -12.4          | Val935.C, Leu936.C, Val806.D, Leu807.D, Ile810.D, Cys834.D, Ile837.D, Phe841.D                                                   |
|                                            | -12.5          | Phe879.C, Leu882.C, Pro901.C, Leu902.C, Leu730.D, Ile731.D, Thr734.D, Val738.D, Trp843.D                                         |
| 3j9p_IC                                    | -13.0          | Val935.B, Ala939.B, Leu871.C, Arg872.C, Thr874.C, Val875.C, Ile878.C, Leu902.C                                                   |
|                                            | -12.9          | Phe879.C, Leu882.C, Leu886.C, Pro901.C, Met720.D, Leu723.D, Cys727.D, Leu730.D, Ile731.D, Thr734.D, Val738.D, Trp843.D, Phe846.D |
|                                            | -12.9          | Met720.A, Leu723.A, Cys727.A, Leu730.A, Ile731.A, Thr734.A, Val738.A, Trp843.A, Phe846.A, Phe879.D, Leu882.D, Leu886.D, Pro901.D |
|                                            | -12.9          | Val935.C, Ala939.C, Val942.C, Leu871.D, Arg872.D, Thr874.D, Val875.D, Ile878.D, Leu902.D, Ile906.D                               |
|                                            | -13.2          | Val935.B, Leu936.B, Ala939.B, Phe947.B, Ile803.C, Val806.C, Leu807.C, Phe841.C                                                   |
|                                            | -13.1          | Val935.C, Leu936.C, Ala939.C, Phe947.C, Ile803.D, Val806.D, Leu807.D, Phe841.D                                                   |
|                                            | -13.0          | Phe879.B, Leu882.B, Leu886.B, Pro901.B, Met720.C, Leu723.C, Cys727.C, Leu730.C, Ile731.C, Thr734.C, Val738.C, Trp843.C, Phe846.C |
|                                            | -13.0          | Leu871.A, Arg872.A, Thr874.A, Val875.A, Ile878.A, Leu902.A, Val935.D, Ala939.D                                                   |
|                                            | -13.0          | Val935.A, Ala939.A, Leu871.B, Arg872.B, Thr874.B, Val875.B, Ile878.B, Leu902.B                                                   |
|                                            | -13.0          | Phe879.A, Leu882.A, Leu886.A, Pro901.A, Met720.B, Leu723.B, Cys727.B, Leu730.B, Ile731.B, Thr734.B, Val738.B, Trp843.B, Phe846.B |
|                                            | -12.9          | Phe938.A, Ala939.A, Val942.A, Ser943.A, Phe947.A, Ile803.B, Leu871.B, Ile906.B                                                   |
|                                            | -13.1          | Ile803.A, Ser804.A, Val806.A, Leu807.A, Phe841.A, Val935.D, Leu936.D, Ala939.D                                                   |
| TRPC3                                      |                |                                                                                                                                  |
| TRPC3, closed, with PE and DAG, Human 6cud |                |                                                                                                                                  |
| 6cud_EC                                    | -12.3          | Phe462.A, Ser466.A, Ala470.A, Thr473.A, Ala474.A, Leu477.A, Ser520.A, Pro522.A, Ile525.A                                         |
|                                            | -12.3          | Met437.D, Phe462.D, Ser466.D, Ala470.D, Thr473.D, Ala474.D, Leu477.D, Pro522.D, Ile525.D                                         |
|                                            | -12.3          | Leu348.C, Pro349.C, Ile383.C, Leu387.C, Phe390.C, Thr423.C, Trp424.C, Thr425.C, Leu428.C, Trp432.C                               |
|                                            | -12.4          | Leu348.D, Pro349.D, Ile383.D, Leu387.D, Phe390.D, Asp394.D, Thr423.D, Trp424.D, Thr425.D, Leu428.D, Trp432.D                     |
|                                            | -12.4          | Leu348.B, Pro349.B, Ile383.B, Leu387.B, Phe390.B, Thr423.B, Trp424.B, Thr425.B, Leu428.B, Trp432.B                               |
|                                            | -12.4          | Phe462.C, Ser466.C, Ala470.C, Thr473.C, Ala474.C, Leu477.C, Pro522.C, Ile525.C                                                   |
|                                            | -12.4          | Phe462.B, Ser466.B, Ala470.B, Thr473.B, Ala474.B, Leu477.B, Ser520.B, Pro522.B, Ile525.B                                         |
| 6cud_IC                                    | -15.3          | Leu348.B, Lys373.B, Ala376.B, His377.B, Ser380.B, Leu428.B, Val431.B, Trp432.B                                                   |
|                                            | -15.3          | Leu348.D, Lys373.D, Ala376.D, His377.D, Ser380.D, Leu428.D, Val431.D, Trp432.D                                                   |
|                                            | -15.3          | Leu348.C, Lys373.C, Ala376.C, His377.C, Ser380.C, Leu428.C, Val431.C, Trp432.C                                                   |
|                                            | -13.7          | Leu444.B, Pro449.B, Tyr452.B, Ile453.B, Val459.B, Phe462.B, Gly463.B, Ser466.B                                                   |
|                                            | -13.7          | Phe579.A, Val637.A, Leu638.A, Ile641.A, Trp457.B, Ile532.B, Val535.B, Leu536.B, Ser539.B, Ala542.B, Gln555.B, Leu558.B, Val562.B |
|                                            | -13.7          | Leu444.C, Pro449.C, Tyr452.C, Ile453.C, Val459.C, Phe462.C, Gly463.C, Ser466.C                                                   |

| PDB <sup>a</sup>                                | E <sup>b</sup> | Local Residues <sup>c</sup>                                                                                                      |
|-------------------------------------------------|----------------|----------------------------------------------------------------------------------------------------------------------------------|
|                                                 | -13.6          | Phe579.C, Val637.C, Leu638.C, Ile641.C, Trp457.D, Ile532.D, Val535.D, Leu536.D, Ser539.D, Ala542.D, Gln555.D, Leu558.D, Val562.D |
|                                                 | -15.3          | Leu348.A, Lys373.A, Ala376.A, His377.A, Ser380.A, Leu428.A, Val431.A, Trp432.A                                                   |
|                                                 | -13.7          | Leu444.D, Pro449.D, Tyr452.D, Ile453.D, Val459.D, Phe462.D, Gly463.D, Ser466.D, Leu529.D                                         |
|                                                 | -13.6          | Leu444.A, Pro449.A, Tyr452.A, Ile453.A, Val459.A, Phe462.A, Gly463.A, Ser466.A                                                   |
|                                                 | -13.6          | Trp457.A, Ile532.A, Val535.A, Leu536.A, Ser539.A, Ala542.A, Gln555.A, Leu558.A, Val562.A, Phe579.D, Val637.D, Leu638.D, Ile641.D |
| TRPC4                                           |                |                                                                                                                                  |
| TRPC4, closed, with CHS and PA, Mouse 5z96      |                |                                                                                                                                  |
| 5z96_EC                                         | -13.6          | Phe439.C, Val440.C, Ser443.C, Leu444.C, Ala447.C, Leu451.C, Trp471.C, Val476.C, Leu480.C                                         |
|                                                 | -13.1          | Phe439.D, Val440.D, Ser443.D, Leu444.D, Ala447.D, Leu451.D, Trp471.D, Val476.D, Leu480.D                                         |
|                                                 | -12.4          | Phe340.D, Pro341.D, Ile401.D, Trp404.D, Met405.D, Pro408.D, Trp409.D, Pro656.D, Phe657.D                                         |
|                                                 | -12.6          | Phe439.A, Ser443.A, Leu446.A, Ala447.A, Leu451.A, Trp471.A, Val476.A, Leu480.A                                                   |
|                                                 | -12.5          | Phe340.C, Pro341.C, Ile401.C, Trp404.C, Met405.C, Pro408.C, Trp409.C, Pro656.C, Phe657.C                                         |
|                                                 | -12.6          | Phe439.B, Ser443.B, Leu446.B, Ala447.B, Leu451.B, Trp471.B, Pro473.B, Val476.B, Leu480.B                                         |
|                                                 | -12.3          | Phe340.B, Pro341.B, Ile401.B, Trp404.B, Met405.B, Pro408.B, Trp409.B, Pro656.B, Phe657.B                                         |
| 5z96_IC                                         | -14.2          | Leu374.A, Phe378.A, Leu492.A, Leu495.A, Phe496.A, Asn499.A, Leu502.A, Phe521.D, Leu525.D, Leu528.D                               |
|                                                 | -14.1          | Phe521.C, Leu525.C, Leu528.C, Leu374.D, Phe378.D, Leu492.D, Leu495.D, Phe496.D, Asn499.D                                         |
|                                                 | -14.2          | Trp433.A, Trp434.A, Met437.A, Phe487.A, Leu513.A, Thr599.D, Thr603.D, Ile607.D                                                   |
|                                                 | -13.3          | Val596.C, Thr599.C, Met600.C, Trp433.D, Leu436.D, Ile483.D, Phe487.D, Leu517.D                                                   |
|                                                 | -12.8          | Val596.B, Thr599.B, Met600.B, Trp433.C, Leu436.C, Ile483.C, Phe487.C, Leu517.C                                                   |
|                                                 | -14.5          | Phe521.A, Leu525.A, Leu528.A, Phe366.B, Leu374.B, Phe378.B, Leu492.B, Leu495.B, Phe496.B, Asn499.B                               |
|                                                 | -14.3          | Phe521.B, Leu525.B, Leu528.B, Leu374.C, Phe378.C, Leu492.C, Leu495.C, Phe496.C, Asn499.C                                         |
| TRPC4, closed, with CHS and PA, Zebrafish, 6glk |                |                                                                                                                                  |
| 6glk_EC                                         |                | [none]                                                                                                                           |
| 6g1k_IC                                         | -14.3          | Leu525.C, Leu528.C, Thr370.D, Leu374.D, Phe378.D, Leu492.D, Leu495.D, Phe496.D, Ala498.D, Asn499.D                               |
|                                                 | -14.2          | Leu525.A, Leu528.A, Thr370.C, Leu374.C, Phe378.C, Leu381.C, Leu492.C, Leu495.C, Phe496.C, Ala498.C, Asn499.C                     |
|                                                 | -15.1          | Phe521.C, Cys524.C, Leu525.C, Leu528.C, Leu568.C, Phe496.D, Asn499.D, Leu502.D                                                   |
|                                                 | -15.0          | Phe521.A, Cys524.A, Leu525.A, Leu528.A, Leu568.A, Phe496.C, Asn499.C, Leu502.C                                                   |
|                                                 | -14.5          | Leu330.D, Cys333.D, Val334.D, Gly337.D, Leu338.D, Ile367.D, Thr370.D, Ala371.D, Leu374.D, Phe378.D                               |
|                                                 | -14.4          | Leu330.C, Cys333.C, Val334.C, Gly337.C, Leu338.C, Ile367.C, Thr370.C, Ala371.C, Leu374.C, Phe378.C                               |
|                                                 | -14.2          | Thr370.A, Leu374.A, Phe378.A, Leu381.A, Leu492.A, Leu495.A, Phe496.A, Ala498.A, Asn499.A, Leu525.B, Leu528.B                     |
|                                                 | -12.3          | Trp433.A, Ile483.A, Ile486.A, Phe487.A, Leu514.A, Leu517.A, Phe530.B, Thr599.B, Met600.B, Thr603.B                               |
|                                                 | -12.0          | Trp433.B, Leu513.B, Leu514.B, Leu517.B, Phe572.B, Thr599.D, Gly602.D, Thr603.D                                                   |
|                                                 | -14.3          | Phe366.B, Thr370.B, Leu374.B, Phe378.B, Leu492.B, Leu495.B, Phe496.B, Ala498.B, Leu525.D, Leu528.D                               |
|                                                 | -15.2          | Phe496.A, Asn499.A, Leu502.A, Phe521.B, Cys524.B, Leu525.B, Leu528.B, Leu568.B                                                   |
|                                                 | -15.1          | Phe496.B, Asn499.B, Leu502.B, Phe521.D, Cys524.D, Leu525.D, Leu528.D, Leu568.D                                                   |
|                                                 | -14.4          | Leu330.A, Cys333.A, Val334.A, Gly337.A, Leu338.A, Ile367.A, Thr370.A, Ala371.A, Leu374.A, Phe378.A                               |
|                                                 | -14.4          | Leu330.B, Cys333.B, Val334.B, Gly337.B, Leu338.B, Ile367.B, Thr370.B, Ala371.B, Leu374.B, Phe378.B                               |
|                                                 | -12.3          | Phe530.C, Thr599.C, Met600.C, Thr603.C, Trp433.D, Ile483.D, Ile486.D, Phe487.D, Leu514.D, Leu517.D                               |
| TRPC5                                           |                |                                                                                                                                  |
| TRPC5, closed, with CHS, Mouse 6aei             |                |                                                                                                                                  |
| 6aei_EC                                         | -12.4          | Phe341.B, Pro342.B, Val402.B, Trp405.B, Met406.B, Trp410.B, Pro659.B, Pro660.B, Phe661.B                                         |
|                                                 | -12.3          | Leu437.C, Phe440.C, Ala441.C, Ser444.C, Leu445.C, Ala448.C, Leu452.C, Trp472.C, Pro474.C, Ile477.C, Leu481.C                     |

| PDB <sup>a</sup>                          | E <sup>b</sup> | Local Residues <sup>c</sup>                                                                                                                 |
|-------------------------------------------|----------------|---------------------------------------------------------------------------------------------------------------------------------------------|
|                                           | -12.1          | Leu349.D, Val402.D, Trp405.D, Met406.D, Pro409.D, Pro660.D, Phe661.D, Ile663.D                                                              |
|                                           | -12.0          | Phe440.B, Ala441.B, Ser444.B, Leu445.B, Ala448.B, Leu452.B, Pro474.B, Ile477.B, Leu481.B                                                    |
|                                           | -11.9          | Phe440.B, Ser444.B, Leu447.B, Ala448.B, Leu452.B, Trp472.B, Pro474.B, Ile477.B                                                              |
|                                           | -12.6          | Phe341.A, Val402.A, Trp405.A, Met406.A, Pro409.A, Trp410.A, Pro659.A, Pro660.A                                                              |
|                                           | -12.1          | Phe440.D, Ala441.D, Ser444.D, Ala448.D, Leu452.D, Trp472.D, Ile477.D, Leu481.D                                                              |
|                                           | -12.0          | Ala441.A, Ser444.A, Leu445.A, Ala448.A, Leu452.A, Val455.A, Pro474.A, Ile477.A, Leu481.A                                                    |
| 6aei_IC                                   | -16.9          | Phe531.A, Thr607.A, Ile611.A, Trp434.B, Trp435.B, Met438.B, Ile484.B, Leu488.B, Leu491.B, Ile494.B, Gln507.B, Leu510.B, Gly511.B, Leu514.B  |
|                                           | -14.4          | Thr603.B, Met604.B, Thr607.B, Ile611.B, Trp434.C, Trp435.C, Met438.C, Ile484.C, Leu488.C, Leu491.C, Ile494.C, Gln507.C, Gly511.C, Leu514.C  |
|                                           | -14.3          | Phe522.C, Leu526.C, Leu529.C, Leu375.D, Leu493.D, Leu496.D, Phe497.D, Ala499.D, Asn500.D, Leu503.D                                          |
|                                           | -14.2          | Phe522.B, Leu526.B, Leu529.B, Leu375.C, Leu493.C, Leu496.C, Phe497.C, Ala499.C, Asn500.C, Leu503.C                                          |
|                                           | -14.5          | Trp434.A, Trp435.A, Met438.A, Ile484.A, Leu488.A, Leu491.A, Leu514.A, Thr603.D, Met604.D, Thr607.D, Ile611.D                                |
|                                           | -14.5          | Thr603.C, Met604.C, Thr607.C, Ile611.C, Trp434.D, Trp435.D, Met438.D, Ile484.D, Leu488.D, Leu491.D, Gly511.D, Leu514.D                      |
|                                           | -13.5          | Leu375.A, Leu493.A, Leu496.A, Phe497.A, Asn500.A, Leu503.A, Phe522.D, Leu526.D, Leu529.D                                                    |
|                                           | -13.5          | Phe522.A, Leu529.A, Phe367.B, Leu375.B, Leu496.B, Phe497.B, Ala499.B, Asn500.B                                                              |
| TRPC6                                     |                |                                                                                                                                             |
| TRPC6, closed, Human 5yx9                 |                |                                                                                                                                             |
| 5yx9_EC                                   | -14.8          | Gly684.A, Leu685.A, Gly684.B, Leu685.B, Glu687.B, Phe683.C, Gly684.C, Leu685.C, Ile682.D, Phe683.D, Gly684.D, Leu685.D                      |
|                                           | -14.1          | Glu672.B, Glu673.B, Phe675.B, Lys676.B, Glu701.C, Asn702.C, Tyr705.C, Val706.C                                                              |
|                                           | -13.7          | Glu672.A, Glu673.A, Phe675.A, Lys676.A, Lys698.B, Asn702.B, Tyr705.B, Val706.B                                                              |
|                                           | -12.4          | Gly532.A, Ile536.A, Ala539.A, Ile542.A, Ala543.A, Met546.A, Pro591.A, Ile594.A, Leu598.A                                                    |
|                                           | -12.3          | Ile536.B, Ala539.B, Ile542.B, Ala543.B, Met546.B, Pro591.B, Ile594.B, Leu598.B                                                              |
|                                           | -14.1          | Glu701.A, Asn702.A, Tyr705.A, Val706.A, Glu672.D, Glu673.D, Phe675.D, Lys676.D                                                              |
|                                           | -14.0          | Glu672.C, Glu673.C, Phe675.C, Lys676.C, Glu701.D, Asn702.D, Tyr705.D, Val706.D                                                              |
|                                           | -12.4          | Phe531.D, Gly532.D, Ala535.D, Ile536.D, Ala539.D, Ile542.D, Ala543.D, Met546.D, Pro591.D, Ile594.D, Leu598.D                                |
|                                           | -12.4          | Phe531.C, Gly532.C, Ala535.C, Ile536.C, Ala539.C, Ile542.C, Ala543.C, Pro591.C, Ile594.C, Leu598.C                                          |
| 5yx9_IC                                   | -14.8          | Ile642.A, Met643.A, Val646.A, Met649.A, Thr451.D, Ile610.D, Ile613.D, Leu614.D                                                              |
|                                           | -14.7          | Phe443.A, Thr451.A, Ile610.A, Ile613.A, Leu614.A, Ile642.B, Met643.B, Val646.B, Met649.B                                                    |
|                                           | -13.0          | Trp526.A, Leu529.A, Ile601.A, Leu605.A, Leu627.A, Gly628.A, Val631.A, Phe648.B, Val706.B, Leu707.B, Val710.B, Thr714.B, Val718.B            |
|                                           | -12.9          | Trp526.B, Leu529.B, Ile601.B, Leu605.B, Leu627.B, Gly628.B, Val631.B, Phe648.C, Val706.C, Leu707.C, Val710.C, Thr714.C, Val718.C            |
|                                           | -13.6          | Leu525.A, Val631.A, Lys632.A, Phe635.A, Met638.A, Phe675.A, Phe679.A, Val706.B, Val710.B, Val713.B                                          |
|                                           | -13.5          | Leu525.B, Val631.B, Lys632.B, Phe635.B, Met638.B, Phe675.B, Phe679.B, Val706.C, Val710.C, Val713.C                                          |
|                                           | -13.5          | Val631.C, Lys632.C, Phe635.C, Met638.C, Phe675.C, Phe679.C, Val706.D, Val710.D, Val713.D                                                    |
|                                           | -14.9          | Thr451.C, Ile610.C, Ile613.C, Leu614.C, Ile642.D, Met643.D, Val646.D, Met649.D                                                              |
|                                           | -14.7          | Thr451.B, Ile610.B, Ile613.B, Leu614.B, Ile642.C, Met643.C, Val646.C, Met649.C                                                              |
|                                           | -13.1          | Phe648.A, Val706.A, Leu707.A, Val710.A, Thr714.A, Val718.A, Trp526.D, Leu529.D, Ile601.D, Leu605.D, Leu627.D, Gly628.D, Thr630.D, Val631.D  |
|                                           | -13.5          | Val706.A, Val710.A, Val713.A, Val631.D, Lys632.D, Phe635.D, Met638.D, Phe675.D, Phe679.D                                                    |
|                                           | -13.0          | Trp526.C, Leu529.C, Ile601.C, Leu605.C, Leu627.C, Gly628.C, Thr630.C, Val631.C, Phe648.D, Val706.D, Leu707.D, Val710.D, Thr714.D, Val718.D  |
| TRPM2                                     |                |                                                                                                                                             |
| TRPM2, closed, plus CHS, Sea Anemone 6co7 |                |                                                                                                                                             |
| 6co7_EC                                   | -15.5          | Ile989.A, Leu992.A, Trp1020.A, Thr1024.A, Val1027.A, Gln1028.A, Tyr1031.A, Met1034.A, Trp1060.B, Leu1064.B, Ala1067.B, Val1071.B, Ile1075.B |
|                                           | -15.5          | Trp1060.A, Leu1064.A, Ala1067.A, Val1071.A, Ile989.D, Leu992.D, Trp1020.D, Thr1024.D, Val1027.D, Gln1028.D, Tyr1031.D, Met1034.D            |

| PDB <sup>a</sup>            | E <sup>b</sup> | Local Residues <sup>c</sup>                                                                                                                 |
|-----------------------------|----------------|---------------------------------------------------------------------------------------------------------------------------------------------|
|                             | -13.0          | Val846.C, Leu849.C, Ala850.C, Phe853.C, Leu854.C, Tyr857.C, His876.C, Thr878.C                                                              |
|                             | -12.9          | Val846.D, Leu849.D, Ala850.D, Phe853.D, Leu854.D, Tyr857.D, Asn862.D, His876.D, Thr878.D                                                    |
|                             | -12.4          | Phe923.D, Thr926.D, Val927.D, Ile930.D, Leu934.D, Ala945.D, Ile948.D, Ile949.D                                                              |
|                             | -12.4          | Ile922.A, Phe923.A, Thr926.A, Val927.A, Ile930.A, Leu934.A, Ala945.A, Ile949.A                                                              |
|                             | -12.3          | Leu872.D, Ile875.D, Ile880.D, Tyr883.D, Phe884.D, Phe887.D, Ile891.D, Phe936.D, Leu1123.D, Ile1127.D                                        |
|                             | -12.3          | Leu872.C, Ile875.C, Ile880.C, Tyr883.C, Phe884.C, Phe887.C, Ile891.C, Phe936.C, Leu1123.C, Ile1127.C                                        |
|                             | -11.9          | Trp1060.A, Leu1061.A, Phe923.D, Thr944.D, Ala945.D, Ile948.D, Ile949.D, Leu952.D, Phe956.D                                                  |
|                             | -12.6          | Tyr723.D, Val846.D, Gly847.D, Ala850.D, Pro877.D, Val881.D, Pro1119.D, Pro1120.D                                                            |
|                             | -12.5          | Tyr723.C, Val846.C, Gly847.C, Ala850.C, Pro877.C, Val881.C, Pro1119.C, Pro1120.C                                                            |
|                             | -12.8          | Leu872.C, Pro877.C, Ile880.C, Val881.C, Phe884.C, Leu1123.C, Leu1124.C, Ile1127.C                                                           |
|                             | -12.8          | Leu872.D, Pro877.D, Ile880.D, Val881.D, Phe884.D, Leu1123.D, Leu1124.D, Ile1127.D                                                           |
|                             | -15.5          | Ile989.B, Leu992.B, Trp1020.B, Thr1024.B, Val1027.B, Gln1028.B, Tyr1031.B, Met1034.B, Trp1060.C, Leu1064.C, Ala1067.C, Val1071.C, Ile1075.C |
|                             | -15.5          | Ile989.C, Leu992.C, Trp1020.C, Thr1024.C, Val1027.C, Gln1028.C, Tyr1031.C, Met1034.C, Trp1060.D, Leu1064.D, Ala1067.D, Val1071.D, Ile1075.D |
|                             | -13.0          | Val846.A, Leu849.A, Ala850.A, Phe853.A, Leu854.A, Tyr857.A, His876.A, Thr878.A                                                              |
|                             | -13.0          | Val846.B, Leu849.B, Ala850.B, Phe853.B, Leu854.B, Tyr857.B, His876.B, Thr878.B                                                              |
|                             | -12.5          | Tyr723.A, Val846.A, Gly847.A, Ala850.A, Pro877.A, Val881.A, Pro1119.A, Pro1120.A                                                            |
|                             | -12.4          | Phe923.B, Thr926.B, Val927.B, Ile930.B, Leu934.B, Ala945.B, Ile948.B, Ile949.B                                                              |
|                             | -12.4          | Ile922.C, Phe923.C, Thr926.C, Val927.C, Ile930.C, Leu934.C, Ala945.C, Ile949.C                                                              |
|                             | -12.4          | Leu872.A, Ile875.A, Ile880.A, Tyr883.A, Phe884.A, Phe887.A, Ile891.A, Phe936.A, Leu1123.A, Ile1127.A                                        |
|                             | -12.3          | Leu872.B, Ile875.B, Ile880.B, Tyr883.B, Phe884.B, Phe887.B, Ile891.B, Phe936.B, Leu1123.B, Ile1127.B                                        |
|                             | -12.1          | Phe923.C, Ala945.C, Ile948.C, Ile949.C, Leu952.C, Phe956.C, Trp1060.D, Leu1061.D                                                            |
|                             | -12.0          | Phe923.B, Thr944.B, Ala945.B, Ile948.B, Ile949.B, Leu952.B, Phe956.B, Trp1060.C, Leu1061.C                                                  |
|                             | -12.8          | Leu872.A, Pro877.A, Ile880.A, Val881.A, Phe884.A, Leu1123.A, Leu1124.A, Ile1127.A                                                           |
| 6co7_IC                     | -16.5          | Thr916.C, Trp917.C, Ile955.C, Val959.C, Ile978.C, Gln979.C, Met982.C, Phe995.D, Tyr999.D, Leu1065.D, Ile1068.D, Tyr1069.D                   |
|                             | -16.5          | Phe995.A, Tyr999.A, Leu1065.A, Ile1068.A, Tyr1069.A, Thr916.D, Trp917.D, Ile955.D, Val959.D, Ile978.D, Gln979.D, Met982.D                   |
|                             | -16.5          | Thr916.A, Trp917.A, Ile955.A, Phe956.A, Val959.A, Val976.A, Ile978.A, Gln979.A, Phe995.B, Tyr999.B, Leu1065.B, Ile1068.B, Tyr1069.B         |
|                             | -14.2          | Phe887.D, Ile891.D, Ile894.D, Arg895.D, His1126.D, Ile1129.D, Phe1130.D, Trp1133.D                                                          |
|                             | -14.2          | Phe887.A, Ile891.A, Ile894.A, Arg895.A, His1126.A, Ile1129.A, Phe1130.A, Trp1133.A                                                          |
|                             | -13.8          | Phe841.C, Val845.C, Leu849.C, Ile852.C, Phe853.C, Ile964.C, Phe965.C, Ile997.D, Ile1001.D                                                   |
|                             | -13.8          | Ile997.A, Ile1001.A, Phe841.D, Val845.D, Leu849.D, Ile852.D, Phe853.D, Ile964.D, Phe965.D, Val967.D                                         |
|                             | -16.7          | Thr916.B, Trp917.B, Ile955.B, Phe956.B, Val959.B, Ile978.B, Gln979.B, Phe995.C, Tyr999.C, Leu1065.C, Ile1068.C, Tyr1069.C                   |
|                             | -14.2          | Phe887.C, Ile891.C, Ile894.C, Arg895.C, His1126.C, Ile1129.C, Phe1130.C, Trp1133.C                                                          |
|                             | -14.2          | Phe887.B, Ile891.B, Ile894.B, Arg895.B, His1126.B, Ile1129.B, Phe1130.B, Trp1133.B                                                          |
|                             | -13.8          | Phe841.B, Val845.B, Leu849.B, Ile852.B, Phe853.B, Ile964.B, Phe965.B, Val967.B, Asn968.B, Ile997.C, Ile1001.C                               |
|                             | -13.7          | Phe841.A, Val845.A, Leu849.A, Ile852.A, Phe853.A, Ile964.A, Phe965.A, Asn968.A, Ile997.B, Ile1001.B                                         |
| TRPM2, open, Zebrafish 6drj |                |                                                                                                                                             |
| 6drj_EC                     | -14.5          | Trp815.B, Gly822.B, Trp825.B, Leu826.B, Val829.B, Arg842.B, Trp849.B, Pro1096.B, Pro1098.B, Phe1099.B                                       |
|                             | -14.0          | Trp815.C, Gly822.C, Trp825.C, Leu826.C, Val829.C, Arg842.C, Trp849.C, Pro1096.C, Pro1098.C, Phe1099.C                                       |
|                             | -13.9          | Trp815.D, Gly822.D, Trp825.D, Leu826.D, Val829.D, Arg842.D, Trp849.D, Pro1096.D, Pro1098.D, Phe1099.D                                       |
|                             | -13.3          | Glu1037.B, Trp1038.B, Ile1041.B, Met1042.B, Phe951.C, Met954.C, Phe955.C, Ser958.C, Val987.C, Tyr988.C, Tyr991.C                            |
|                             | -13.3          | Glu1037.A, Trp1038.A, Ile1041.A, Met1042.A, Phe951.B, Met954.B, Phe955.B, Val987.B, Tyr988.B, Tyr991.B                                      |
|                             | -12.9          | Phe951.C, Phe955.C, Val962.C, Leu979.C, Ile982.C, Ile983.C, Trp825.D, Ala828.D, Val829.D, Ile833.D                                          |
|                             | -12.9          | Phe951.B, Phe955.B, Val962.B, Leu979.B, Ile982.B, Ile983.B, Val987.B, Trp825.C, Ala828.C, Met832.C, Ile833.C                                |

| PDB <sup>a</sup>              | E <sup>b</sup> | Local Residues <sup>c</sup>                                                                                            |
|-------------------------------|----------------|------------------------------------------------------------------------------------------------------------------------|
|                               | -12.7          | Phe955.A, Val962.A, Leu979.A, Ile982.A, Ile983.A, Val987.A, Phe821.B, Trp825.B, Ala828.B, Met832.B, Ile833.B           |
|                               | -12.6          | Asn997.A, Thr1000.A, Asn997.B, Asn997.C, Thr1000.C, Ile1060.C, Asn997.D, Thr1000.D                                     |
|                               | -13.8          | Trp815.A, Trp825.A, Leu826.A, Val829.A, Arg842.A, Trp849.A, Pro1096.A, Pro1098.A, Phe1099.A                            |
|                               | -13.4          | Glu1037.C, Trp1038.C, Ile1041.C, Met1042.C, Phe951.D, Met954.D, Phe955.D, Ser958.D, Val987.D, Tyr988.D, Tyr991.D       |
|                               | -13.1          | Phe951.A, Met954.A, Phe955.A, Ser958.A, Val987.A, Tyr988.A, Tyr991.A, Glu1037.D, Trp1038.D, Ile1041.D, Met1042.D       |
|                               | -12.9          | Trp825.A, Ala828.A, Val829.A, Ile833.A, Phe951.D, Phe955.D, Val962.D, Leu979.D, Ile982.D, Ile983.D                     |
| 6drj_IC                       |                | [none]                                                                                                                 |
| TRPM2, closed, Zebrafish 6drk |                |                                                                                                                        |
| 6drk_EC                       | -13.8          | Asn997.A, Thr1000.A, Asn997.B, Thr1000.B, Asn997.C, Thr1000.C, Asn997.D, Thr1000.D                                     |
|                               | -13.7          | Trp815.C, Ala818.C, Ser819.C, Leu826.C, Trp841.C, Arg842.C, Leu845.C, Pro1096.C, Pro1098.C                             |
|                               | -13.4          | Phe951.A, Met954.A, Phe955.A, Ile983.A, Arg984.A, Val987.A, Tyr988.A, Trp1038.D, Ile1041.D, Met1042.D                  |
|                               | -13.1          | Leu888.A, Leu892.A, Tyr909.A, Ile910.A, Val913.A, Ile914.A, Ile917.A, Ile921.A, Phe1035.D, Pro1036.D, Leu1039.D        |
|                               | -12.7          | Phe1035.A, Leu1039.A, Leu888.B, Leu892.B, Ile910.B, Val913.B, Ile914.B, Ile917.B, Ile921.B                             |
|                               | -12.6          | Glu1037.A, Trp1038.A, Ile1041.A, Met1042.A, Phe951.B, Phe955.B, Val987.B, Tyr988.B                                     |
|                               | -12.3          | Ala818.B, Ser819.B, Gly822.B, Trp825.B, Leu826.B, Val829.B, Arg842.B, Trp849.B, Pro1098.B                              |
|                               | -13.8          | Asn997.A, Thr1000.A, Asn997.B, Thr1000.B, Asn997.C, Thr1000.C, Asn997.D, Thr1000.D                                     |
|                               | -13.7          | Ile1041.C, Met1042.C, Phe951.D, Met954.D, Phe955.D, Ser958.D, Ile983.D, Arg984.D, Val987.D, Tyr988.D                   |
|                               | -13.0          | Phe1035.C, Leu1039.C, Leu888.D, Leu892.D, Tyr909.D, Ile910.D, Val913.D, Ile914.D, Ile917.D, Ile921.D                   |
|                               | -12.8          | Met1042.B, Leu1049.B, Phe951.C, Met954.C, Ile983.C, Arg984.C, Val987.C, Tyr988.C, Tyr991.C                             |
|                               | -12.6          | Ser819.D, Leu826.D, Trp841.D, Arg842.D, Leu845.D, Pro1096.D, Pro1098.D, Phe1099.D                                      |
|                               | -12.6          | Phe1035.B, Leu1039.B, Leu888.C, Tyr909.C, Ile910.C, Val913.C, Ile914.C, Ile917.C, Ile921.C                             |
|                               | -12.2          | Ser819.A, Gly822.A, Trp825.A, Leu826.A, Val829.A, Arg842.A, Trp849.A, Pro1098.A, Leu979.D                              |
| 6drk_IC                       | -16.0          | Asn1052.A, Asn1057.A, Ile1060.A, Asn1064.A, Ile1060.B, Asn1064.B, Ile1060.C, Asn1064.C, Ile1060.D, Asn1064.D           |
|                               | -15.0          | Trp960.A, Val1046.A, Phe1050.A, Trp882.B, Leu924.B, Met927.B, Ile940.B, Val943.B, Arg944.B, Met947.B                   |
|                               | -14.0          | Leu881.A, Leu885.A, Ile917.A, Leu924.A, Arg944.A, Met947.A, Met1042.D, Met1043.D, Val1046.D                            |
|                               | -14.0          | Trp960.A, Tyr964.A, Met1043.A, Val1046.A, Tyr1047.A, Phe1050.A, Leu881.B, Trp882.B, Ile920.B, Leu924.B, Arg944.B       |
|                               | -13.9          | Trp960.A, Met1043.A, Val1046.A, Tyr1047.A, Phe1050.A, Leu881.B, Ile920.B, Leu924.B, Arg944.B, Met947.B, Leu948.B       |
|                               | -13.5          | Leu881.D, Trp882.D, Ile884.D, Leu885.D, Leu888.D, Ile917.D, Ile921.D, Leu924.D, Arg944.D                               |
|                               | -14.3          | Arg944.A, Met947.A, Leu948.A, Phe951.A, Met954.A, Tyr991.A, Cys1045.D, Val1046.D, Leu1049.D                            |
|                               | -14.2          | Thr851.B, Cys855.B, Ile858.B, Arg859.B, Tyr862.B, Ile894.B, Leu897.B, Ile898.B                                         |
|                               | -15.0          | Thr851.D, Cys855.D, Ile858.D, Arg859.D, Tyr862.D, Ile894.D, Leu897.D, Ile898.D                                         |
|                               | -13.0          | Trp960.B, Met1043.B, Leu881.C, Trp882.C, Leu885.C, Ile917.C, Ile920.C, Leu924.C, Arg944.C                              |
|                               | -13.1          | Thr851.A, Val854.A, Cys855.A, Ile858.A, Arg859.A, Ile894.A, Leu897.A, Ile898.A                                         |
|                               | -14.7          | Trp960.C, Tyr964.C, Met1043.C, Val1046.C, Tyr1047.C, Phe1050.C, Ile920.D, Leu924.D, Arg944.D, Met947.D, Leu948.D       |
|                               | -14.5          | Met1042.C, Cys1045.C, Val1046.C, Leu1049.C, Leu881.D, Arg944.D, Met947.D, Leu948.D, Phe951.D, Tyr991.D                 |
|                               | -13.6          | Trp960.B, Val1046.B, Phe1050.B, Trp882.C, Leu924.C, Met927.C, Ile940.C, Val943.C, Arg944.C, Met947.C                   |
|                               | -13.2          | Trp960.B, Met1043.B, Val1046.B, Tyr1047.B, Ile920.C, Arg944.C, Met947.C, Leu948.C                                      |
| TRPM2, closed, Human 6mix     |                |                                                                                                                        |
| 6mix_EC                       | -15.6          | Arg962.B, Val963.B, Asp964.B, Trp965.B, Leu966.B, Phe967.B, Phe807.C, Leu810.C, Cys811.C, Ala814.C, Met818.C, Phe903.C |
|                               | -15.5          | Val946.C, Val950.C, Arg962.C, Val963.C, Asp964.C, Trp965.C, Leu966.C, Phe967.C, Phe807.D, Cys811.D, Met818.D, Phe903.D |
|                               | -14.3          | Phe979.A, Gly980.A, Gln981.A, Phe979.B, Gly980.B, Gln981.B, Phe979.C, Gly980.C, Gln981.C, Gly980.D, Gln981.D, Ile982.D |

| PDB <sup>a</sup>          | E <sup>b</sup> | Local Residues <sup>c</sup>                                                                                                                                                                    |
|---------------------------|----------------|------------------------------------------------------------------------------------------------------------------------------------------------------------------------------------------------|
|                           | -15.7          | Phe807.A, Leu810.A, Cys811.A, Met818.A, Phe903.A, Val946.D, Val950.D, Arg962.D, Val963.D, Asp964.D, Trp965.D, Leu966.D, Phe967.D, Val971.D                                                     |
|                           | -15.7          | Val946.A, Val950.A, Arg962.A, Val963.A, Asp964.A, Trp965.A, Leu966.A, Phe967.A, Phe807.B, Cys811.B, Met818.B, Phe903.B                                                                         |
| 6mix_IC                   | -14.1          | Trp1023.B, Val1026.B, Leu1027.B, Lys932.C, Phe935.C, Leu938.C, Phe939.C, Phe967.C, Trp754.D                                                                                                    |
|                           | -13.9          | Trp1023.A, Val1026.A, Leu1027.A, Lys932.B, Phe935.B, Leu938.B, Phe939.B, Phe967.B, Trp754.C                                                                                                    |
|                           | -14.1          | Leu753.A, Trp754.A, Thr757.A, Trp1023.C, Val1026.C, Leu1027.C, Phe939.D, Phe967.D                                                                                                              |
|                           | -13.3          | Phe867.B, Lys870.B, Leu871.B, Gly874.B, Leu878.B, Ile898.B, Leu901.B, Leu905.B                                                                                                                 |
|                           | -13.3          | Leu836.B, Val840.B, Cys841.B, Glu843.B, Met844.B, Leu847.B, Ile876.B, Val880.B, Leu883.B, Thr884.B, Leu887.B                                                                                   |
|                           | -13.3          | Trp1023.B, Leu1024.B, Lys870.C, Gly874.C, Leu878.C, Val897.C, Ile898.C, Leu901.C, Leu905.C                                                                                                     |
|                           | -13.2          | Leu836.C, Val840.C, Cys841.C, Glu843.C, Met844.C, Ile876.C, Val880.C, Leu883.C, Thr884.C, Leu887.C                                                                                             |
|                           | -13.0          | Leu836.D, Val840.D, Cys841.D, Glu843.D, Met844.D, Leu847.D, Ile876.D, Val880.D, Leu883.D, Thr884.D, Leu887.D                                                                                   |
|                           | -13.9          | Lys932.A, Phe935.A, Leu938.A, Phe939.A, Phe967.A, Trp754.B, Trp1023.D, Val1026.D, Leu1027.D                                                                                                    |
|                           | -13.2          | Phe867.A, Lys870.A, Leu871.A, Gly874.A, Leu878.A, Ile898.A, Leu901.A, Leu905.A                                                                                                                 |
|                           | -13.4          | Trp1023.C, Leu1024.C, Lys870.D, Gly874.D, Leu878.D, Val897.D, Ile898.D, Leu901.D, Leu905.D                                                                                                     |
| TRPM2, closed, Human 6mix |                |                                                                                                                                                                                                |
| 6mix_EC                   | -14.2          | Phe1020.A, Trp1023.A, Leu938.B, Phe939.B, Ala942.B, Val943.B, Asp964.B, Phe967.B                                                                                                               |
|                           | -13.6          | Pro825.C, Tyr833.C, Leu834.C, Leu836.C, Phe837.C, Phe879.C, Leu883.C, Arg886.C, Leu887.C                                                                                                       |
|                           | -13.6          | Tyr833.D, Leu834.D, Leu836.D, Phe837.D, Phe879.D, Leu883.D, Arg886.D, Leu887.D                                                                                                                 |
|                           | -13.5          | Tyr833.B, Leu834.B, Leu836.B, Phe837.B, Phe879.B, Leu883.B, Arg886.B, Leu887.B                                                                                                                 |
|                           | -13.3          | Phe1020.B, Trp1023.B, Leu1024.B, Leu878.C, Pro894.C, Val897.C, Ile898.C, Leu901.C, Leu905.C                                                                                                    |
|                           | -13.3          | Phe1020.A, Trp1023.A, Leu1024.A, Leu878.B, Pro894.B, Val897.B, Ile898.B, Leu901.B, Leu905.B                                                                                                    |
|                           | -14.3          | Phe1020.B, Trp1023.B, Leu938.C, Phe939.C, Ala942.C, Val943.C, Asp964.C, Phe967.C                                                                                                               |
|                           | -12.9          | Val873.B, Leu877.B, Ala881.B, Thr884.B, Cys885.B, Thr891.B, Pro894.B, Ile898.B                                                                                                                 |
|                           | -12.6          | Gly874.C, Leu877.C, Leu878.C, Ala881.C, Cys885.C, Thr891.C, Pro894.C, Ile898.C                                                                                                                 |
|                           | -12.5          | Phe939.C, Leu966.C, Phe967.C, Ala970.C, Val971.C, Leu804.D, Phe807.D, Met818.D                                                                                                                 |
|                           | -12.7          | Leu801.B, Leu804.B, Ser805.B, Ala808.B, Leu812.B, Tyr815.B, Trp827.B, Cys828.B, Ala831.B                                                                                                       |
|                           | -14.1          | Phe1020.C, Trp1023.C, Leu938.D, Phe939.D, Ala942.D, Val943.D, Asp964.D, Phe967.D                                                                                                               |
|                           | -14.0          | Leu938.A, Phe939.A, Ala942.A, Val943.A, Asp964.A, Phe967.A, Phe1020.D, Trp1023.D                                                                                                               |
|                           | -13.3          | Phe1020.C, Trp1023.C, Leu1024.C, Leu878.D, Pro894.D, Val897.D, Ile898.D, Leu901.D, Leu905.D                                                                                                    |
|                           | -13.3          | Tyr833.A, Leu834.A, Leu836.A, Phe837.A, Val840.A, Phe879.A, Leu883.A, Arg886.A, Leu887.A                                                                                                       |
|                           | -13.1          | Leu878.A, Pro894.A, Val897.A, Ile898.A, Leu901.A, Leu905.A, Phe1020.D, Trp1023.D, Leu1024.D                                                                                                    |
|                           | -13.0          | Val873.A, Leu877.A, Ala881.A, Thr884.A, Cys885.A, Thr891.A, Pro894.A, Ile898.A                                                                                                                 |
|                           | -12.8          | Leu801.A, Leu804.A, Ser805.A, Ala808.A, Leu812.A, Tyr815.A, Trp827.A, Cys828.A, Ala831.A                                                                                                       |
|                           | -12.8          | Val873.D, Leu877.D, Ala881.D, Thr884.D, Cys885.D, Thr891.D, Pro894.D, Ile898.D                                                                                                                 |
| 6mix_IC                   | -14.6          | Trp1023.A, Val1026.A, Leu1027.A, Phe935.B, Leu938.B, Phe939.B, Phe967.B, Leu753.C, Trp754.C, Thr757.C                                                                                          |
|                           | -14.6          | Trp1023.B, Val1026.B, Leu1027.B, Lys932.C, Phe935.C, Leu938.C, Phe939.C, Phe967.C, Leu753.D, Trp754.D, Thr757.D                                                                                |
|                           | -14.1          | Phe979.A, Gly980.A, Leu1041.A, Asn1042.A, Ile1045.A, Leu1041.B, Asn1042.B, Ile1045.B, Phe979.C, Gly980.C, Leu1041.C, Asn1042.C, Ile1045.C, Phe979.D, Gly980.D, Leu1041.D, Asn1042.D, Ile1045.D |
|                           | -14.0          | Leu1024.B, Leu1027.B, Leu1031.B, Phe1035.B, Leu871.C, Ile898.C, Leu901.C, Leu905.C, Leu908.C, Met931.C, Lys932.C, Val934.C, Phe935.C                                                           |
|                           | -14.0          | Val840.D, Cys841.D, Glu843.D, Met844.D, Leu847.D, Ile876.D, Leu883.D, Thr884.D                                                                                                                 |
|                           | -14.0          | Val840.C, Cys841.C, Glu843.C, Met844.C, Leu847.C, Ile876.C, Val880.C, Leu883.C, Thr884.C                                                                                                       |
|                           | -14.0          | Leu1024.C, Leu1027.C, Leu1031.C, Phe1035.C, Leu871.D, Ile898.D, Leu901.D, Leu905.D, Leu908.D, Met931.D, Val934.D, Phe935.D                                                                     |
|                           | -13.7          | Phe867.C, Lys870.C, Leu871.C, Gly874.C, Leu877.C, Leu878.C, Ala881.C, Cys885.C, Ile898.C                                                                                                       |
|                           | -13.6          | Phe867.D, Lys870.D, Leu871.D, Gly874.D, Leu877.D, Leu878.D, Ala881.D, Cys885.D, Ile898.D                                                                                                       |
|                           | -14.0          | Leu1024.A, Leu1027.A, Leu1031.A, Phe1035.A, Leu871.B, Ile898.B, Leu901.B, Leu905.B, Leu908.B, Met931.B, Val934.B, Phe935.B                                                                     |

| PDB <sup>a</sup>                                    | E <sup>b</sup> | Local Residues <sup>c</sup>                                                                                                           |
|-----------------------------------------------------|----------------|---------------------------------------------------------------------------------------------------------------------------------------|
|                                                     | -13.9          | Val840.B, Glu843.B, Met844.B, Leu847.B, Ile876.B, Val880.B, Leu883.B, Thr884.B                                                        |
|                                                     | -13.7          | Phe867.B, Lys870.B, Leu871.B, Gly874.B, Leu877.B, Leu878.B, Ala881.B, Cys885.B, Ile898.B                                              |
|                                                     | -14.6          | Lys932.A, Phe935.A, Leu938.A, Phe939.A, Phe967.A, Leu753.B, Trp754.B, Thr757.B, Trp1023.D, Val1026.D, Leu1027.D                       |
|                                                     | -14.4          | Leu753.A, Trp754.A, Thr757.A, Trp1023.C, Val1026.C, Lys932.D, Phe935.D, Phe939.D, Phe967.D                                            |
|                                                     | -13.9          | Val840.A, Cys841.A, Glu843.A, Met844.A, Leu847.A, Ile876.A, Val880.A, Thr884.A                                                        |
|                                                     | -13.8          | Leu871.A, Leu901.A, Leu905.A, Leu908.A, Val927.A, Met931.A, Val934.A, Phe935.A, Trp1023.D, Leu1024.D, Leu1027.D, Leu1031.D, Phe1035.D |
| TRPM2, closed, Ca and ADPR-bound, Human 6mj2        |                |                                                                                                                                       |
| 6mj2_EC                                             | -12.7          | Phe1020.A, Pro1021.A, Trp1023.A, Leu1024.A, Leu878.B, Thr891.B, Pro894.B, Ile898.B, Leu901.B, Leu905.B                                |
|                                                     | -12.7          | Pro1021.C, Trp1023.C, Leu1024.C, Leu878.D, Thr891.D, Pro894.D, Ile898.D, Leu901.D, Leu905.D                                           |
|                                                     | -12.7          | Pro1021.B, Trp1023.B, Leu1024.B, Leu878.C, Thr891.C, Pro894.C, Ile898.C, Leu901.C, Leu905.C                                           |
|                                                     | -12.3          | Leu801.D, Ser805.D, Leu812.D, Tyr815.D, Cys828.D, Trp835.D, Pro1081.D, Pro1083.D                                                      |
|                                                     | -12.3          | Leu761.C, Leu801.C, Leu804.C, Ser805.C, Ala808.C, Leu812.C, Tyr815.C, Cys828.C                                                        |
|                                                     | -12.2          | Pro825.C, Tyr833.C, Phe837.C, Val840.C, Ile876.C, Val880.C, Leu883.C, Leu887.C                                                        |
|                                                     | -12.2          | Pro825.D, Tyr833.D, Phe837.D, Val840.D, Ile876.D, Val880.D, Leu883.D, Leu887.D                                                        |
|                                                     | -12.7          | Leu878.A, Thr891.A, Pro894.A, Ile898.A, Leu901.A, Leu905.A, Phe1020.D, Pro1021.D, Trp1023.D, Leu1024.D                                |
|                                                     | -12.3          | Leu801.B, Ser805.B, Leu812.B, Tyr815.B, Cys828.B, Trp835.B, Pro1081.B, Pro1083.B                                                      |
|                                                     | -12.3          | Leu801.A, Ser805.A, Leu812.A, Tyr815.A, Cys828.A, Trp835.A, Pro1081.A, Pro1083.A                                                      |
|                                                     | -12.2          | Pro825.A, Tyr833.A, Phe837.A, Val840.A, Ile876.A, Val880.A, Leu883.A, Leu887.A                                                        |
|                                                     | -12.2          | Pro825.B, Tyr833.B, Phe837.B, Val840.B, Ile876.B, Val880.B, Leu883.B, Leu887.B                                                        |
| 6mj2_IC                                             | -14.5          | Val840.B, Glu843.B, Met844.B, Gln846.B, Leu847.B, Tyr863.B, Ile876.B, Val880.B                                                        |
|                                                     | -14.5          | Val840.A, Glu843.A, Met844.A, Gln846.A, Leu847.A, Tyr863.A, Ile876.A, Val880.A                                                        |
|                                                     | -14.5          | Val840.D, Glu843.D, Met844.D, Gln846.D, Leu847.D, Tyr863.D, Ile876.D, Val880.D                                                        |
| TRPM4                                               |                |                                                                                                                                       |
| TRPM4, closed, with Ca and decavanadate, Human 5wp6 |                |                                                                                                                                       |
| 5wp6_EC                                             | -14.9          | Leu934.A, Leu963.A, Arg964.A, Phe967.A, Tyr968.A, Val1021.D, Leu1022.D, Val1025.D                                                     |
|                                                     | -14.9          | Val1021.C, Leu1022.C, Val1025.C, Leu934.D, Leu963.D, Arg964.D, Phe967.D, Tyr968.D                                                     |
|                                                     | -13.8          | Leu791.A, Leu795.A, Ser798.A, Leu802.A, Leu906.A, Phe935.D, Val939.D, Val942.D, Phe959.D, Ile962.D, Leu963.D, Phe967.D                |
|                                                     | -13.8          | Phe935.C, Val939.C, Val942.C, Phe959.C, Ile962.C, Leu963.C, Phe967.C, Leu791.D, Leu795.D, Ser798.D, Leu802.D, Leu906.D                |
|                                                     | -13.7          | Val788.A, Ser789.A, Leu792.A, Leu796.A, Ser812.A, Leu813.A, Leu816.A, Trp820.A, Ala1076.A, Pro1078.A, Phe1079.A                       |
|                                                     | -13.6          | Val788.B, Ser789.B, Leu792.B, Leu796.B, Ser812.B, Leu813.B, Leu816.B, Trp820.B, Ala1076.B, Pro1078.B, Phe1079.B                       |
|                                                     | -12.6          | Tyr1015.C, Ala1016.C, Trp1018.C, Leu1019.C, Val870.D, Cys874.D, Leu890.D, Thr893.D, Val894.D, Ile897.D, Val901.D                      |
|                                                     | -12.5          | Val870.A, Cys874.A, Leu890.A, Thr893.A, Val894.A, Ile897.A, Val901.A, Ala1016.D, Trp1018.D, Leu1019.D                                 |
|                                                     | -13.4          | Phe935.A, Val939.A, Val942.A, Phe959.A, Ile962.A, Leu963.A, Phe967.A, Leu791.B, Leu795.B, Ser798.B, Leu802.B, Leu906.B                |
|                                                     | -15.0          | Val1021.A, Leu1022.A, Val1025.A, Phe931.B, Leu934.B, Leu963.B, Arg964.B, Phe967.B, Tyr968.B                                           |
|                                                     | -14.9          | Val1021.B, Leu1022.B, Val1025.B, Leu934.C, Leu963.C, Arg964.C, Phe967.C, Tyr968.C                                                     |
|                                                     | -13.8          | Phe935.B, Val939.B, Val942.B, Phe959.B, Ile962.B, Leu963.B, Phe967.B, Leu791.C, Leu795.C, Ser798.C, Leu802.C, Leu906.C                |
|                                                     | -13.7          | Val788.D, Ser789.D, Leu792.D, Leu796.D, Ser812.D, Leu813.D, Leu816.D, Trp820.D, Ala1076.D, Pro1078.D, Phe1079.D                       |
|                                                     | -13.6          | Val788.C, Ser789.C, Leu792.C, Leu796.C, Ser812.C, Leu813.C, Leu816.C, Trp820.C, Ala1076.C, Pro1078.C, Phe1079.C                       |
|                                                     | -12.4          | Ala1016.B, Trp1018.B, Leu1019.B, Val870.C, Cys874.C, Leu890.C, Thr893.C, Val894.C, Ile897.C, Val901.C                                 |
|                                                     | -12.4          | Ala1016.A, Trp1018.A, Leu1019.A, Val870.B, Cys874.B, Leu890.B, Thr893.B, Val894.B, Ile897.B, Val901.B                                 |
| 5wp6_IC                                             | -15.9          | Phe936.C, Trp940.C, Leu1023.C, Trp864.D, Ile897.D, Met900.D, Val901.D, Val904.D, Ile920.D, Val921.D, Val923.D, Ser924.D, Met927.D     |

| PDB <sup>a</sup>          | E <sup>b</sup> | Local Residues <sup>c</sup>                                                                                                                     |
|---------------------------|----------------|-------------------------------------------------------------------------------------------------------------------------------------------------|
|                           | -15.9          | Trp864.A, Ile897.A, Met900.A, Val901.A, Val904.A, Ile920.A, Val921.A, Val923.A, Ser924.A, Met927.A, Phe936.D, Trp940.D, Leu1023.D               |
|                           | -14.9          | Phe931.A, Leu934.A, Phe935.A, Gly938.A, Leu941.A, Phe967.A, Phe910.B, Asn913.B, Gln915.B, Leu916.B                                              |
|                           | -14.9          | Phe910.A, Asn913.A, Gln915.A, Leu916.A, Phe931.D, Leu934.D, Phe935.D, Gly938.D, Leu941.D, Phe967.D                                              |
|                           | -13.5          | Ile690.B, Val694.B, Phe783.B, Met784.B, Val787.B, Val788.B, Leu791.B, Leu792.B, Phe910.B, Asn913.B                                              |
|                           | -13.4          | Ile690.A, Val694.A, Phe783.A, Met784.A, Val787.A, Val788.A, Leu791.A, Leu792.A, Phe910.A, Asn913.A                                              |
|                           | -13.1          | Phe697.A, Trp776.A, Ile782.A, Gly785.A, Ala1074.A, Leu1075.A, Ala1076.A, Pro1078.A, Phe1079.A                                                   |
|                           | -13.0          | Phe697.B, Trp776.B, Ile782.B, Gly785.B, Val788.B, Ala1074.B, Leu1075.B, Ala1076.B, Pro1078.B, Phe1079.B                                         |
|                           | -12.9          | Ser863.A, Cys867.A, Val870.A, Cys874.A, Ile897.A, Asp898.A, Val901.A, Ser924.A                                                                  |
|                           | -12.9          | Ser863.D, Cys867.D, Val870.D, Cys874.D, Ile897.D, Asp898.D, Val901.D, Ser924.D                                                                  |
|                           | -15.9          | Phe936.A, Trp940.A, Leu1023.A, Trp864.B, Ile897.B, Met900.B, Val901.B, Val904.B, Leu907.B, Ile920.B, Val921.B, Val923.B, Ser924.B, Met927.B     |
|                           | -15.9          | Phe936.B, Trp940.B, Leu1023.B, Trp864.C, Ile897.C, Met900.C, Val901.C, Val904.C, Leu907.C, Ile920.C, Val921.C, Val923.C, Ser924.C, Met927.C     |
|                           | -14.9          | Phe931.B, Leu934.B, Phe935.B, Gly938.B, Leu941.B, Phe967.B, Phe910.C, Asn913.C, Gln915.C, Leu916.C                                              |
|                           | -14.9          | Phe931.C, Leu934.C, Phe935.C, Gly938.C, Leu941.C, Phe967.C, Phe910.D, Asn913.D, Gln915.D, Leu916.D                                              |
|                           | -13.5          | Ile690.C, Val694.C, Phe783.C, Met784.C, Val787.C, Val788.C, Leu791.C, Leu792.C, Phe910.C, Asn913.C                                              |
|                           | -13.4          | Trp680.D, Ile690.D, Val694.D, Phe783.D, Met784.D, Val787.D, Val788.D, Leu791.D, Leu792.D, Phe910.D, Asn913.D                                    |
|                           | -13.1          | Phe697.D, Trp776.D, Ile782.D, Gly785.D, Ala1074.D, Leu1075.D, Ala1076.D, Pro1078.D, Phe1079.D                                                   |
|                           | -13.0          | Phe697.C, Trp776.C, Ile782.C, Gly785.C, Val788.C, Ala1074.C, Leu1075.C, Ala1076.C, Pro1078.C, Phe1079.C                                         |
|                           | -12.9          | Ser863.C, Cys867.C, Val870.C, Cys874.C, Ile897.C, Asp898.C, Val901.C, Ser924.C                                                                  |
|                           | -13.0          | Ser863.B, Cys867.B, Val870.B, Cys874.B, Ile897.B, Asp898.B, Val901.B, Ser924.B                                                                  |
| TRPM4, closed, Mouse 6bcj |                |                                                                                                                                                 |
| 6bcj_EC                   | -16.1          | Leu959.C, Arg960.C, Phe963.C, Tyr964.C, Trp1014.D, Val1017.D, Leu1018.D, Ile1021.D                                                              |
|                           | -16.0          | Cys934.A, Pro956.A, Leu959.A, Arg960.A, Phe963.A, Tyr964.A, Val1017.C, Ile1021.C                                                                |
|                           | -13.6          | Ser785.B, Leu788.B, Leu792.B, His795.B, Asp800.B, Ser809.B, Leu812.B, Trp816.B, Ala1072.B, Pro1074.B, Leu1075.B                                 |
|                           | -13.6          | Ser785.A, Leu788.A, Leu792.A, His795.A, Asp800.A, Ser809.A, Leu812.A, Trp816.A, Ala1072.A, Pro1074.A, Leu1075.A                                 |
|                           | -12.3          | Leu791.A, Ala794.A, His795.A, Leu798.A, Val799.A, Cys934.C, Val935.C, Val938.C, Val942.C, Leu955.C, Ile958.C, Leu959.C, Phe963.C                |
|                           | -13.0          | Cys934.A, Val935.A, Val938.A, Val942.A, Leu955.A, Ile958.A, Leu959.A, Phe963.A, Leu791.B, Ala794.B, His795.B, Leu798.B, Val799.B                |
|                           | -13.7          | Ser785.C, Leu788.C, Leu792.C, His795.C, Asp800.C, Ser809.C, Leu812.C, Trp816.C, Ala1072.C, Pro1074.C, Leu1075.C                                 |
|                           | -12.3          | Leu791.C, Ala794.C, His795.C, Leu798.C, Val799.C, Cys934.D, Val935.D, Val938.D, Val942.D, Leu955.D, Ile958.D, Leu959.D, Phe963.D                |
|                           | -16.1          | Val1017.B, Ile1021.B, Cys934.D, Pro956.D, Leu959.D, Arg960.D, Phe963.D, Tyr964.D                                                                |
|                           | -16.0          | Val1017.A, Ile1021.A, Cys934.B, Pro956.B, Leu959.B, Arg960.B, Phe963.B, Tyr964.B                                                                |
|                           | -13.6          | Ser785.D, Leu788.D, Leu792.D, His795.D, Asp800.D, Ser809.D, Leu812.D, Trp816.D, Ala1072.D, Pro1074.D, Leu1075.D                                 |
|                           | -12.7          | Cys934.B, Val935.B, Val938.B, Val942.B, Leu955.B, Ile958.B, Leu959.B, Phe963.B, Leu791.D, Ala794.D, His795.D, Leu798.D, Val799.D                |
| 6bcj_IC                   | -15.4          | Trp860.C, Leu893.C, Leu900.C, Leu903.C, Ile916.C, Val919.C, Ser920.C, Phe932.D, Trp936.D, Leu1018.D, Leu1019.D, Val1022.D, Val1026.D, Leu1030.D |
|                           | -15.4          | Trp860.A, Leu893.A, Leu900.A, Leu903.A, Ile916.A, Val919.A, Ser920.A, Phe932.C, Trp936.C, Leu1018.C, Leu1019.C, Val1022.C, Val1026.C, Leu1030.C |
|                           | -14.5          | Phe927.A, Leu930.A, Phe931.A, Cys934.A, Asn909.B, Gln911.B, Leu912.B, Leu1018.C, Ile1021.C                                                      |
|                           | -14.5          | Asn909.A, Leu912.A, Phe927.C, Leu930.C, Phe931.C, Cys934.C, Leu1018.D, Ile1021.D                                                                |
|                           | -13.9          | Ile1021.B, Ile690.C, Phe906.C, Asn909.C, Leu912.C, Phe927.D, Leu930.D, Phe931.D, Cys934.D                                                       |
|                           | -14.7          | Ile690.A, Leu694.A, Phe698.A, Phe779.A, Leu780.A, Val783.A, Val784.A, Leu787.A, Leu788.A, Phe906.A, Asn909.A                                    |
|                           | -14.6          | Ile690.B, Leu694.B, Phe698.B, Phe779.B, Leu780.B, Val783.B, Val784.B, Leu787.B, Phe906.B, Asn909.B                                              |
|                           | -15.4          | Phe932.B, Trp936.B, Leu1018.B, Leu1019.B, Val1022.B, Val1026.B, Leu1030.B, Trp860.D, Leu893.D, Leu900.D, Leu903.D, Ile916.D, Val919.D, Ser920.D |



| PDB <sup>a</sup>                     | E <sup>b</sup> | Local Residues <sup>c</sup>                                                                                                                          |
|--------------------------------------|----------------|------------------------------------------------------------------------------------------------------------------------------------------------------|
|                                      | -15.3          | Phe932.A, Trp936.A, Leu1018.A, Leu1019.A, Val1022.A, Val1026.A, Leu1030.A, Trp860.B, Leu893.B, Leu900.B, Leu903.B, Ile916.B, Val919.B, Ser920.B      |
|                                      | -14.6          | Leu1018.A, Ile1021.A, Phe927.B, Leu930.B, Phe931.B, Cys934.B, Asn909.D, Gln911.D, Leu912.D                                                           |
|                                      | -14.7          | Ile690.C, Leu694.C, Phe698.C, Phe779.C, Leu780.C, Val783.C, Val784.C, Leu787.C, Leu788.C, Phe906.C, Asn909.C                                         |
|                                      | -14.7          | Ile690.D, Leu694.D, Phe698.D, Phe779.D, Leu780.D, Val783.D, Val784.D, Leu787.D, Leu788.D, Phe906.D, Asn909.D                                         |
| TRPM4, closed, Mouse 6bcl            |                |                                                                                                                                                      |
| 6bcl_EC                              | -15.7          | Val1017.B, Ile1021.B, Cys934.D, Pro956.D, Leu959.D, Arg960.D, Phe963.D, Tyr964.D                                                                     |
|                                      | -15.6          | Leu930.C, Pro956.C, Leu959.C, Arg960.C, Phe963.C, Tyr964.C, Val1017.D, Ile1021.D                                                                     |
|                                      | -14.2          | Ser785.D, Leu788.D, Leu792.D, His795.D, Asp800.D, Ser809.D, Leu812.D, Trp816.D, Ala1072.D, Pro1074.D, Leu1075.D                                      |
|                                      | -14.2          | Ser785.C, Leu788.C, Leu792.C, His795.C, Asp800.C, Ser809.C, Leu812.C, Trp816.C, Ala1072.C, Pro1074.C, Leu1075.C                                      |
|                                      | -14.2          | Ser785.A, Leu788.A, Leu792.A, His795.A, Asp800.A, Ser809.A, Leu812.A, Trp816.A, Ala1072.A, Pro1074.A, Leu1075.A                                      |
|                                      | -13.5          | Leu787.C, Leu791.C, Ala794.C, His795.C, Leu798.C, Val799.C, Leu902.C, Cys934.D, Val935.D, Val938.D, Val942.D, Leu955.D, Ile958.D, Leu959.D, Phe963.D |
|                                      | -13.4          | Leu791.A, Ala794.A, His795.A, Leu798.A, Val799.A, Cys934.C, Val935.C, Val938.C, Val942.C, Leu955.C, Ile958.C, Leu959.C, Phe963.C                     |
|                                      | -12.3          | Pro806.C, Leu811.C, Tyr814.C, Phe818.C, Leu821.C, Leu872.C, Val875.C, Leu879.C                                                                       |
|                                      | -12.3          | Pro806.A, Leu811.A, Tyr814.A, Phe818.A, Leu821.A, Leu872.A, Val875.A, Leu879.A                                                                       |
|                                      | -12.3          | Pro806.B, Leu811.B, Tyr814.B, Phe818.B, Leu821.B, Leu825.B, Leu872.B, Val875.B, Leu879.B                                                             |
|                                      | -15.8          | Val1017.A, Ile1021.A, Cys934.B, Pro956.B, Leu959.B, Arg960.B, Phe963.B, Tyr964.B                                                                     |
|                                      | -15.2          | Cys934.A, Leu959.A, Arg960.A, Phe963.A, Tyr964.A, Trp1014.C, Val1017.C, Leu1018.C                                                                    |
|                                      | -14.2          | Ser785.B, Leu788.B, Leu792.B, His795.B, Asp800.B, Ser809.B, Leu812.B, Trp816.B, Ala1072.B, Pro1074.B, Leu1075.B                                      |
|                                      | -13.6          | Cys934.A, Val935.A, Val938.A, Val942.A, Leu955.A, Ile958.A, Leu959.A, Phe963.A, Leu787.B, Leu791.B, Ala794.B, His795.B, Leu798.B, Val799.B, Leu902.B |
|                                      | -13.6          | Cys934.B, Val935.B, Val938.B, Val942.B, Leu955.B, Ile958.B, Leu959.B, Phe963.B, Leu787.D, Leu791.D, Ala794.D, His795.D, Leu798.D, Val799.D, Leu902.D |
| 6bcl_IC                              | -15.2          | Phe932.B, Trp936.B, Leu1018.B, Leu1019.B, Val1022.B, Trp860.D, Leu893.D, Leu900.D, Leu903.D, Ile916.D, Val917.D, Val919.D, Ser920.D, Met923.D        |
|                                      | -14.4          | Asn909.A, Gln911.A, Leu912.A, Phe927.C, Leu930.C, Phe931.C, Cys934.C, Ile1021.D                                                                      |
|                                      | -14.4          | Ile1021.B, Asn909.C, Gln911.C, Leu912.C, Phe927.D, Leu930.D, Phe931.D, Cys934.D                                                                      |
|                                      | -15.1          | Trp860.C, Leu893.C, Leu900.C, Leu903.C, Ile916.C, Val919.C, Ser920.C, Met923.C, Phe932.D, Trp936.D, Leu1018.D, Leu1019.D, Val1022.D                  |
|                                      | -14.9          | Ile690.C, Leu694.C, Phe698.C, Phe779.C, Leu780.C, Val783.C, Val784.C, Leu787.C, Leu788.C, Phe906.C, Asn909.C                                         |
|                                      | -14.9          | Ile690.A, Leu694.A, Phe698.A, Phe779.A, Leu780.A, Val783.A, Val784.A, Leu787.A, Leu788.A, Phe906.A, Asn909.A                                         |
|                                      | -13.5          | Phe697.A, Trp772.A, Gly781.A, Val784.A, Ala1070.A, Leu1071.A, Ala1072.A, Leu1075.A                                                                   |
|                                      | -13.5          | Phe697.C, Trp772.C, Gly781.C, Val784.C, Ala1070.C, Leu1071.C, Ala1072.C, Leu1075.C                                                                   |
|                                      | -13.9          | Phe927.B, Leu930.B, Phe931.B, Cys934.B, Phe963.B, Ile690.D, Phe906.D, Asn909.D, Gln911.D, Leu912.D                                                   |
|                                      | -15.2          | Phe932.A, Trp936.A, Leu1018.A, Leu1019.A, Val1022.A, Trp860.B, Leu893.B, Leu900.B, Leu903.B, Ile916.B, Val919.B, Ser920.B, Met923.B                  |
|                                      | -14.4          | Phe927.A, Leu930.A, Phe931.A, Cys934.A, Asn909.B, Gln911.B, Leu912.B, Ile1021.C                                                                      |
|                                      | -15.7          | Trp860.A, Leu893.A, Met896.A, Leu900.A, Leu903.A, Ile916.A, Val919.A, Ser920.A, Trp936.C, Leu1018.C, Leu1019.C, Val1022.C, Val1026.C, Leu1030.C      |
|                                      | -14.9          | Ile690.D, Leu694.D, Phe698.D, Phe779.D, Leu780.D, Val783.D, Val784.D, Leu787.D, Leu788.D, Phe906.D, Asn909.D                                         |
|                                      | -14.9          | Ile690.B, Leu694.B, Phe698.B, Phe779.B, Leu780.B, Val783.B, Val784.B, Leu787.B, Leu788.B, Phe906.B, Asn909.B                                         |
|                                      | -13.5          | Phe697.B, Trp772.B, Gly781.B, Val784.B, Leu788.B, Ala1070.B, Leu1071.B, Ala1072.B, Leu1075.B                                                         |
|                                      | -13.5          | Phe697.D, Trp772.D, Gly781.D, Val784.D, Leu788.D, Ala1070.D, Leu1071.D, Ala1072.D, Leu1075.D                                                         |
| TRPM4, closed, ATP bound, Mouse 6bco |                |                                                                                                                                                      |
| 6bco_EC                              | -15.3          | Asp980.A, Trp1014.A, Val1017.A, Cys934.B, Leu959.B, Arg960.B, Phe963.B, Tyr964.B                                                                     |

| PDB <sup>a</sup>                     | E <sup>b</sup> | Local Residues <sup>c</sup>                                                                                                                               |
|--------------------------------------|----------------|-----------------------------------------------------------------------------------------------------------------------------------------------------------|
|                                      | -15.0          | Pro956.A, Leu959.A, Arg960.A, Phe963.A, Tyr964.A, Val1017.C, Leu1018.C, Ile1021.C                                                                         |
|                                      | -15.1          | Leu930.C, Cys934.C, Leu959.C, Arg960.C, Phe963.C, Tyr964.C, Trp1014.D, Val1017.D, Leu1018.D, Ile1021.D                                                    |
|                                      | -13.8          | Ser785.B, Leu788.B, Leu792.B, His795.B, Asp800.B, Ser809.B, Leu812.B, Trp816.B, Ala1072.B, Pro1074.B, Leu1075.B                                           |
|                                      | -13.7          | Ser785.A, Leu788.A, Leu792.A, His795.A, Asp800.A, Ser809.A, Leu812.A, Trp816.A, Ala1072.A, Pro1074.A, Leu1075.A                                           |
|                                      | -15.1          | Val1017.B, Leu1018.B, Ile1021.B, Pro956.D, Ser957.D, Leu959.D, Arg960.D, Phe963.D, Tyr964.D                                                               |
|                                      | -13.8          | Ser785.D, Leu788.D, Leu792.D, His795.D, Asp800.D, Ser809.D, Leu812.D, Trp816.D, Ala1072.D, Pro1074.D, Leu1075.D                                           |
|                                      | -13.7          | Ser785.C, Leu788.C, Leu792.C, His795.C, Asp800.C, Ser809.C, Leu812.C, Trp816.C, Ala1072.C, Pro1074.C, Leu1075.C                                           |
| 6bco_IC                              | -15.1          | Phe927.B, Phe931.B, Cys934.B, Val938.B, Phe963.B, Asn909.D, Gln911.D, Leu912.D                                                                            |
|                                      | -14.8          | Trp860.A, Leu893.A, Met896.A, Leu900.A, Leu903.A, Ile916.A, Val919.A, Ser920.A, Phe932.C, Trp936.C, Leu1015.C, Leu1019.C, Val1022.C, Val1026.C, Leu1030.C |
|                                      | -14.8          | Phe932.A, Trp936.A, Leu1015.A, Leu1019.A, Val1026.A, Leu1030.A, Trp860.B, Leu893.B, Leu900.B, Ile916.B, Val919.B, Ser920.B                                |
|                                      | -14.5          | Phe697.A, Trp772.A, Gly781.A, Val784.A, Ser785.A, Leu788.A, Ala1070.A, Leu1071.A, Ala1072.A, Leu1075.A                                                    |
|                                      | -14.5          | Phe697.B, Trp772.B, Gly781.B, Val784.B, Ser785.B, Leu788.B, Ala1070.B, Leu1071.B, Ala1072.B, Leu1075.B                                                    |
|                                      | -14.3          | Thr859.A, Trp860.A, Cys863.A, Leu893.A, Ile897.A, Leu1015.C, Leu1018.C, Leu1019.C, Val1022.C                                                              |
|                                      | -15.2          | Ile690.D, Leu694.D, Phe698.D, Leu780.D, Val784.D, Leu787.D, Leu788.D, Leu791.D, Phe906.D, Asn909.D                                                        |
|                                      | -15.1          | Phe927.A, Phe931.A, Cys934.A, Val938.A, Phe963.A, Asn909.B, Gln911.B, Leu912.B                                                                            |
|                                      | -14.5          | Asn909.A, Leu912.A, Phe927.C, Leu930.C, Phe931.C, Cys934.C, Leu1018.D, Ile1021.D                                                                          |
|                                      | -14.9          | Ile690.B, Leu694.B, Phe698.B, Phe779.B, Leu780.B, Val784.B, Leu787.B, Phe906.B, Asn909.B                                                                  |
|                                      | -13.6          | Leu821.A, Glu824.A, Leu825.A, Gly828.A, Leu829.A, Leu852.A, Leu865.A, Thr869.A, Leu872.A, Leu873.A                                                        |
|                                      | -13.6          | Leu821.B, Glu824.B, Leu825.B, Gly828.B, Leu829.B, Leu852.B, Leu865.B, Thr869.B, Leu872.B, Leu873.B                                                        |
|                                      | -13.6          | Phe818.A, Cys822.A, Leu825.A, Arg826.A, Leu829.A, Gly830.A, Ile1077.A, His1080.A, Leu1083.A, Leu1084.A                                                    |
|                                      | -13.5          | Phe818.B, Cys822.B, Leu825.B, Arg826.B, Leu829.B, Ile1077.B, His1080.B, Leu1083.B, Leu1084.B                                                              |
|                                      | -13.6          | Phe818.C, Cys822.C, Leu825.C, Arg826.C, Leu829.C, Ile1077.C, His1080.C, Leu1083.C, Leu1084.C                                                              |
|                                      | -13.5          | Phe818.D, Cys822.D, Leu825.D, Arg826.D, Leu829.D, Gly830.D, Ile1077.D, His1080.D, Leu1083.D, Leu1084.D                                                    |
|                                      | -15.1          | Asn909.C, Gln911.C, Leu912.C, Phe927.D, Phe931.D, Cys934.D, Val938.D, Phe963.D                                                                            |
|                                      | -14.8          | Trp860.C, Leu893.C, Met896.C, Leu900.C, Leu903.C, Ile916.C, Val919.C, Ser920.C, Phe932.D, Trp936.D, Leu1015.D, Leu1019.D, Val1022.D, Val1026.D, Leu1030.D |
|                                      | -14.8          | Phe932.B, Trp936.B, Leu1015.B, Leu1019.B, Val1026.B, Leu1030.B, Trp860.D, Leu893.D, Leu900.D, Ile916.D, Val919.D, Ser920.D                                |
|                                      | -14.7          | Leu787.A, Leu902.A, Asn909.A, Gln911.A, Leu912.A, Phe927.C, Phe931.C, Cys934.C, Val938.C, Phe963.C                                                        |
|                                      | -14.5          | Phe697.D, Trp772.D, Gly781.D, Val784.D, Ser785.D, Leu788.D, Ala1070.D, Leu1071.D, Ala1072.D, Leu1075.D                                                    |
|                                      | -14.5          | Phe697.C, Trp772.C, Gly781.C, Val784.C, Ser785.C, Leu788.C, Ala1070.C, Leu1071.C, Ala1072.C, Leu1075.C                                                    |
|                                      | -14.3          | Thr859.C, Trp860.C, Cys863.C, Leu893.C, Ile897.C, Leu1015.D, Leu1018.D, Leu1019.D, Val1022.D                                                              |
|                                      | -14.3          | Leu1015.B, Leu1018.B, Leu1019.B, Val1022.B, Thr859.D, Trp860.D, Cys863.D, Leu893.D, Ile897.D                                                              |
|                                      | -15.1          | Ile690.C, Leu694.C, Phe698.C, Phe779.C, Leu780.C, Val784.C, Leu787.C, Leu788.C, Leu791.C, Phe906.C, Asn909.C                                              |
|                                      | -15.1          | Ile690.A, Leu694.A, Phe698.A, Leu780.A, Val784.A, Leu787.A, Leu788.A, Leu791.A, Phe906.A, Asn909.A                                                        |
|                                      | -13.6          | Leu821.C, Glu824.C, Leu825.C, Gly828.C, Leu829.C, Leu852.C, Leu865.C, Thr869.C, Leu872.C, Leu873.C                                                        |
|                                      | -13.6          | Leu821.D, Glu824.D, Leu825.D, Gly828.D, Leu829.D, Leu852.D, Leu865.D, Thr869.D, Leu872.D, Leu873.D                                                        |
| TRPM4, closed, ATP bound, Mouse 6bcq |                |                                                                                                                                                           |
| 6bcq_EC                              | -15.7          | Trp1014.B, Val1017.B, Leu1018.B, Ile1021.B, Pro956.D, Leu959.D, Arg960.D, Phe963.D, Tyr964.D                                                              |
|                                      | -15.6          | Pro956.C, Leu959.C, Arg960.C, Phe963.C, Tyr964.C, Val1017.D, Leu1018.D, Ile1021.D                                                                         |
|                                      | -15.4          | Leu930.A, Cys934.A, Pro956.A, Leu959.A, Arg960.A, Phe963.A, Tyr964.A, Trp1014.C, Val1017.C, Leu1018.C, Ile1021.C                                          |
|                                      | -13.4          | Ser785.C, Leu788.C, Leu792.C, His795.C, Asp800.C, Ser809.C, Leu812.C, Trp816.C, Ala1072.C, Pro1074.C, Leu1075.C                                           |
|                                      | -13.0          | Ser785.A, Leu788.A, Leu792.A, His795.A, Asp800.A, Ser809.A, Leu812.A, Trp816.A, Ala1072.A, Pro1074.A, Leu1075.A                                           |
|                                      | -12.6          | Leu866.A, Thr869.A, Leu873.A, Leu886.A, Thr889.A, Val890.A, Leu893.A, Tyr1011.C, Ala1012.C, Trp1014.C                                                     |

| PDB <sup>a</sup>          | E <sup>b</sup> | Local Residues <sup>c</sup>                                                                                                      |
|---------------------------|----------------|----------------------------------------------------------------------------------------------------------------------------------|
|                           | -12.4          | Tyr1011.B, Ala1012.B, Trp1014.B, Leu866.D, Thr869.D, Leu873.D, Leu886.D, Thr889.D, Val890.D, Leu893.D                            |
|                           | -15.5          | Val1017.A, Ile1021.A, Cys934.B, Pro956.B, Leu959.B, Arg960.B, Phe963.B, Tyr964.B                                                 |
|                           | -13.6          | Ser785.D, Leu788.D, Leu791.D, Leu792.D, His795.D, Asp800.D, Ser809.D, Leu812.D, Trp816.D, Ala1072.D, Pro1074.D, Leu1075.D        |
|                           | -12.7          | Ser785.B, Leu788.B, Leu792.B, His795.B, Asp800.B, Ser809.B, Leu812.B, Trp816.B, Ala1072.B, Pro1074.B, Leu1075.B                  |
|                           | -12.6          | Tyr1011.A, Ala1012.A, Trp1014.A, Leu866.B, Thr869.B, Leu873.B, Leu886.B, Thr889.B, Val890.B, Leu893.B                            |
| 6bcq_IC                   | -15.1          | Leu821.C, Glu824.C, Leu825.C, Gly828.C, Leu829.C, Leu852.C, Leu865.C, Leu868.C, Thr869.C, Leu872.C, Leu873.C                     |
|                           | -15.0          | Thr859.A, Trp860.A, Cys863.A, Leu866.A, Leu893.A, Ile897.A, Leu900.A, Leu1015.C, Leu1019.C                                       |
|                           | -14.8          | Thr859.C, Trp860.C, Cys863.C, Leu866.C, Leu893.C, Ile897.C, Leu900.C, Leu1015.D, Leu1019.D                                       |
|                           | -14.7          | Leu821.A, Glu824.A, Leu825.A, Gly828.A, Leu829.A, Leu852.A, Leu865.A, Thr869.A, Leu872.A, Leu873.A                               |
|                           | -14.5          | Leu791.A, Gln911.A, Leu912.A, Phe927.C, Phe931.C, Cys934.C, Val938.C, Phe963.C                                                   |
|                           | -14.9          | Ile690.A, Leu694.A, Phe698.A, Phe779.A, Val783.A, Val784.A, Leu787.A, Phe906.A, Asn909.A                                         |
|                           | -14.6          | Phe927.A, Leu930.A, Phe931.A, Cys934.A, Phe906.B, Asn909.B, Leu912.B, Leu1018.C, Ile1021.C                                       |
|                           | -14.5          | Phe697.A, Trp772.A, Gly781.A, Val784.A, Ala1070.A, Leu1071.A, Ala1072.A, Leu1075.A                                               |
|                           | -14.5          | Phe697.C, Trp772.C, Thr777.C, Gly781.C, Val784.C, Leu788.C, Ala1070.C, Leu1071.C, Ala1072.C, Leu1075.C                           |
|                           | -14.3          | Phe818.C, Cys822.C, Leu825.C, Arg826.C, Leu829.C, Ile1077.C, His1080.C, Val1081.C, Leu1084.C                                     |
|                           | -14.2          | Asn909.C, Gln911.C, Leu912.C, Phe927.D, Leu930.D, Phe931.D, Cys934.D, Phe963.D                                                   |
|                           | -13.9          | Phe818.A, Cys822.A, Leu825.A, Arg826.A, Leu829.A, Ile1077.A, His1080.A, Val1081.A, Leu1084.A                                     |
|                           | -13.8          | Ile690.B, Leu694.B, Phe698.B, Phe779.B, Leu780.B, Val783.B, Val784.B, Leu787.B, Phe906.B, Asn909.B                               |
|                           | -14.1          | Ile690.C, Leu694.C, Phe698.C, Phe779.C, Leu780.C, Val783.C, Val784.C, Leu787.C, Phe906.C, Asn909.C                               |
|                           | -15.3          | Leu1015.B, Leu1019.B, Thr859.D, Trp860.D, Cys863.D, Leu866.D, Leu893.D, Ile897.D, Leu900.D                                       |
|                           | -14.8          | Phe697.B, Trp772.B, Gly781.B, Val784.B, Leu788.B, Ala1070.B, Leu1071.B, Ala1072.B, Leu1075.B                                     |
|                           | -14.6          | Leu1015.A, Leu1018.A, Leu1019.A, Val1022.A, Thr859.B, Trp860.B, Cys863.B, Leu893.B, Ile897.B, Leu900.B                           |
|                           | -14.8          | Leu821.B, Glu824.B, Leu825.B, Gly828.B, Leu829.B, Leu852.B, Leu865.B, Thr869.B, Leu872.B, Leu873.B                               |
|                           | -14.1          | Phe927.B, Leu930.B, Phe931.B, Cys934.B, Phe963.B, Asn909.D, Gln911.D, Leu912.D                                                   |
|                           | -14.3          | Phe697.D, Trp772.D, Thr777.D, Ala778.D, Gly781.D, Ser785.D, Leu788.D, Ala1070.D, Leu1071.D, Ala1072.D, Leu1075.D                 |
|                           | -14.3          | Leu821.D, Glu824.D, Leu825.D, Gly828.D, Leu829.D, Leu852.D, Leu865.D, Leu868.D, Thr869.D, Leu872.D, Leu873.D                     |
|                           | -14.0          | Phe818.B, Cys822.B, Leu825.B, Arg826.B, Leu829.B, Ile1077.B, His1080.B, Val1081.B, Leu1083.B, Leu1084.B                          |
|                           | -14.0          | Ile690.D, Leu694.D, Phe698.D, Leu780.D, Val784.D, Leu787.D, Phe906.D, Asn909.D                                                   |
| TRPM4, closed, Human 6bqr |                |                                                                                                                                  |
| 6bqr_EC                   | -15.0          | Val1021.A, Leu1022.A, Val1025.A, Leu934.B, Phe935.B, Leu963.B, Arg964.B, Phe967.B, Tyr968.B                                      |
|                           | -14.9          | Val1021.B, Leu1022.B, Val1025.B, Leu934.D, Phe935.D, Pro960.D, Leu963.D, Arg964.D, Phe967.D, Tyr968.D                            |
|                           | -13.9          | Leu792.C, Leu795.C, Leu796.C, Arg799.C, Leu813.C, Trp820.C, Ala1076.C, Phe1079.C                                                 |
|                           | -13.8          | Leu792.D, Leu795.D, Leu796.D, Arg799.D, Leu813.D, Trp820.D, Ala1076.D, Phe1079.D                                                 |
|                           | -13.3          | Leu791.C, Leu795.C, Ser798.C, Arg799.C, Leu802.C, Val803.C, Val942.D, Val946.D, Phe959.D, Ile962.D, Leu963.D, Val966.D, Phe967.D |
|                           | -14.9          | Leu934.C, Phe935.C, Leu963.C, Arg964.C, Phe967.C, Tyr968.C, Val1021.D, Leu1022.D, Val1025.D                                      |
|                           | -13.1          | Phe822.B, Leu825.B, Leu829.B, Leu876.B, Val879.B, Gly880.B, Leu883.B, Thr884.B                                                   |
|                           | -13.1          | Phe822.D, Leu825.D, Leu829.D, Leu876.D, Val879.D, Gly880.D, Leu883.D, Thr884.D                                                   |
|                           | -12.6          | Tyr1015.A, Trp1018.A, Leu1019.A, Val870.B, Leu890.B, Thr893.B, Val894.B, Ile897.B, Val901.B                                      |
|                           | -12.4          | Tyr1015.B, Trp1018.B, Leu1019.B, Val870.D, Leu890.D, Thr893.D, Val894.D, Ile897.D                                                |
|                           | -13.3          | Val942.B, Val946.B, Phe959.B, Ile962.B, Leu963.B, Val966.B, Phe967.B, Leu791.D, Leu795.D, Ser798.D, Arg799.D, Leu802.D, Val803.D |
|                           | -14.9          | Leu934.A, Phe935.A, Leu963.A, Arg964.A, Phe967.A, Tyr968.A, Val1021.C, Leu1022.C, Val1025.C                                      |
|                           | -13.7          | Leu792.B, Leu795.B, Leu796.B, Arg799.B, Leu813.B, Trp820.B, Ala1076.B, Phe1079.B                                                 |
|                           | -13.6          | Leu792.A, Leu795.A, Leu796.A, Arg799.A, Leu813.A, Trp820.A, Ala1076.A, Phe1079.A                                                 |

| PDB <sup>a</sup>                    | E <sup>b</sup> | Local Residues <sup>c</sup>                                                                                                        |
|-------------------------------------|----------------|------------------------------------------------------------------------------------------------------------------------------------|
|                                     | -13.1          | Phe822.C, Leu825.C, Leu829.C, Leu876.C, Val879.C, Gly880.C, Cys881.C, Leu883.C, Thr884.C                                           |
|                                     | -12.8          | Val942.A, Val946.A, Phe959.A, Ile962.A, Leu963.A, Val966.A, Phe967.A, Leu791.B, Leu795.B, Ser798.B, Arg799.B, Leu802.B, Val803.B   |
|                                     | -12.8          | Phe822.A, Leu825.A, Leu829.A, Leu876.A, Val879.A, Gly880.A, Leu883.A, Thr884.A                                                     |
|                                     | -12.4          | Val870.A, Leu890.A, Thr893.A, Val894.A, Ile897.A, Tyr1015.C, Trp1018.C, Leu1019.C                                                  |
|                                     | -13.2          | Leu791.A, Leu795.A, Ser798.A, Arg799.A, Leu802.A, Val803.A, Val942.C, Val946.C, Phe959.C, Ile962.C, Leu963.C, Val966.C, Phe967.C   |
|                                     | -13.1          | Leu869.C, Val870.C, Thr873.C, Cys874.C, Leu877.C, Leu890.C, Thr893.C, Val894.C, Trp1018.D, Leu1019.D                               |
| 6bqr_IC                             | -15.5          | Gln915.C, Leu916.C, Lys928.D, Phe931.D, Leu934.D, Phe935.D, Leu941.D, Phe967.D                                                     |
|                                     | -15.4          | Lys928.B, Phe931.B, Leu934.B, Phe935.B, Leu941.B, Phe967.B, Ile690.D, Gln915.D, Leu916.D                                           |
|                                     | -14.7          | Phe936.A, Trp940.A, Leu1023.A, Ile1026.A, Trp864.B, Ile897.B, Val904.B, Leu907.B, Ile920.B, Val921.B, Val923.B, Ser924.B, Met927.B |
|                                     | -15.2          | Trp680.C, Ile690.C, Leu693.C, Phe698.C, Phe783.C, Met784.C, Val787.C, Val788.C, Leu791.C, Phe910.C, Asn913.C                       |
|                                     | -15.1          | Trp680.D, Ile690.D, Leu693.D, Phe698.D, Phe783.D, Met784.D, Val787.D, Val788.D, Leu791.D, Phe910.D, Asn913.D                       |
|                                     | -14.5          | Phe936.B, Trp940.B, Ile1026.B, Trp864.D, Ile897.D, Val904.D, Leu907.D, Ile920.D, Val921.D, Val923.D, Ser924.D, Met927.D            |
|                                     | -15.3          | Lys928.A, Phe931.A, Leu934.A, Phe935.A, Leu941.A, Phe967.A, Gln915.B, Leu916.B                                                     |
|                                     | -15.2          | Gln915.A, Leu916.A, Lys928.C, Phe931.C, Leu934.C, Phe935.C, Leu941.C, Phe967.C                                                     |
|                                     | -14.6          | Trp864.C, Ile897.C, Val904.C, Leu907.C, Ile920.C, Val921.C, Val923.C, Ser924.C, Met927.C, Phe936.D, Trp940.D, Ile1026.D            |
|                                     | -15.1          | Trp680.A, Ile690.A, Leu693.A, Phe698.A, Phe783.A, Met784.A, Val787.A, Val788.A, Leu791.A, Phe910.A, Asn913.A                       |
|                                     | -15.1          | Trp680.B, Ile690.B, Leu693.B, Phe698.B, Phe783.B, Met784.B, Val787.B, Val788.B, Leu791.B, Phe910.B, Asn913.B                       |
|                                     | -14.4          | Trp864.A, Ile897.A, Val904.A, Leu907.A, Ile920.A, Val921.A, Val923.A, Ser924.A, Met927.A, Phe936.C, Trp940.C, Ile1026.C            |
| TRPM4, closed, Ca bound, Human 6bqv |                |                                                                                                                                    |
| 6bqv_EC                             | -15.0          | Trp1018.A, Val1021.A, Leu1022.A, Val1025.A, Leu934.B, Phe935.B, Leu963.B, Arg964.B, Phe967.B, Tyr968.B                             |
|                                     | -15.0          | Leu934.A, Phe935.A, Leu963.A, Arg964.A, Phe967.A, Tyr968.A, Val1021.C, Leu1022.C, Val1025.C                                        |
|                                     | -12.8          | Tyr1015.A, Trp1018.A, Leu1019.A, Val870.B, Leu890.B, Thr893.B, Val894.B, Ile897.B                                                  |
|                                     | -12.8          | Val870.A, Leu890.A, Thr893.A, Val894.A, Ile897.A, Tyr1015.C, Ala1016.C, Trp1018.C, Leu1019.C                                       |
|                                     | -15.0          | Leu934.C, Phe935.C, Leu963.C, Arg964.C, Phe967.C, Tyr968.C, Val1021.D, Leu1022.D, Val1025.D                                        |
|                                     | -15.0          | Val1021.B, Leu1022.B, Val1025.B, Leu934.D, Phe935.D, Leu963.D, Arg964.D, Phe967.D, Tyr968.D                                        |
|                                     | -12.8          | Val870.C, Leu890.C, Thr893.C, Val894.C, Ile897.C, Tyr1015.D, Trp1018.D, Leu1019.D                                                  |
|                                     | -12.8          | Tyr1015.B, Trp1018.B, Leu1019.B, Val870.D, Leu890.D, Thr893.D, Val894.D, Ile897.D                                                  |
| 6bqv_IC                             | -15.3          | Ile897.A, Met900.A, Val904.A, Leu907.A, His908.A, Ile920.A, Val921.A, Val923.A, Ser924.A, Phe936.C, Trp940.C, Leu1023.C            |
|                                     | -15.3          | Phe936.A, Trp940.A, Leu1023.A, Ile897.B, Met900.B, Val904.B, Leu907.B, His908.B, Ile920.B, Val921.B, Val923.B, Ser924.B            |
|                                     | -14.8          | Phe931.A, Leu934.A, Phe935.A, Phe967.A, Phe910.B, Asn913.B, Gln915.B, Leu916.B                                                     |
|                                     | -14.6          | Ile690.D, Phe698.D, Phe783.D, Met784.D, Val787.D, Val788.D, Leu791.D, Leu795.D, Phe910.D, Asn913.D                                 |
|                                     | -14.9          | Phe931.B, Leu934.B, Phe935.B, Gly938.B, Val942.B, Phe967.B, Ile690.D, Asn913.D, Gln915.D, Leu916.D                                 |
|                                     | -14.0          | Trp680.B, Ile690.B, Val780.B, Phe783.B, Met784.B, Val787.B, Val788.B, Leu791.B, Leu795.B, Phe910.B, Asn913.B                       |
|                                     | -15.3          | Ile897.C, Met900.C, Val904.C, Leu907.C, His908.C, Ile920.C, Val921.C, Val923.C, Ser924.C, Phe936.D, Trp940.D, Leu1023.D            |
|                                     | -14.6          | Ile690.A, Phe698.A, Phe783.A, Met784.A, Val787.A, Val788.A, Leu791.A, Leu795.A, Phe910.A, Asn913.A                                 |
|                                     | -14.6          | Trp680.C, Ile690.C, Phe698.C, Phe783.C, Met784.C, Val787.C, Val788.C, Leu791.C, Leu795.C, Phe910.C, Asn913.C                       |
|                                     | -14.1          | Val1025.B, Phe910.C, Asn913.C, Gln915.C, Leu916.C, Phe931.D, Leu934.D, Phe935.D, Gly938.D, Leu941.D, Phe967.D                      |
|                                     | -14.9          | Ile690.A, Asn913.A, Gln915.A, Leu916.A, Phe931.C, Leu934.C, Phe935.C, Gly938.C, Val942.C, Phe967.C                                 |
| TRPM4, closed, Human 6bwi           |                |                                                                                                                                    |

| PDB <sup>a</sup>          | E <sup>b</sup>                                                                                                            | Local Residues <sup>c</sup>                                                                                                             |                                                                                                                                      |
|---------------------------|---------------------------------------------------------------------------------------------------------------------------|-----------------------------------------------------------------------------------------------------------------------------------------|--------------------------------------------------------------------------------------------------------------------------------------|
| 6bwi_EC                   | -14.2                                                                                                                     | Asn1017.A, Trp1018.A, Val1021.A, Leu1022.A, Leu963.D, Arg964.D, Phe967.D, Tyr968.D                                                      |                                                                                                                                      |
|                           | -13.9                                                                                                                     | Leu934.A, Phe935.A, Leu963.A, Arg964.A, Phe967.A, Tyr968.A, Trp1018.B, Val1021.B, Leu1022.B, Val1025.B                                  |                                                                                                                                      |
|                           | -13.0                                                                                                                     | Pro810.A, Leu815.A, Tyr818.A, Phe819.A, Phe822.A, Leu883.A, Ile1080.A, Val1081.A, Leu1085.A                                             |                                                                                                                                      |
|                           | -13.0                                                                                                                     | Pro810.C, Leu815.C, Tyr818.C, Phe819.C, Phe822.C, Leu883.C, Ile1080.C, Val1081.C, Leu1085.C                                             |                                                                                                                                      |
|                           | -15.2                                                                                                                     | Gly938.C, Leu963.C, Phe967.C, Tyr968.C, Asn1017.D, Trp1018.D, Val1021.D, Leu1022.D, Val1025.D                                           |                                                                                                                                      |
|                           | -12.7                                                                                                                     | Pro810.D, Leu815.D, Phe819.D, Phe822.D, Cys826.D, Ile1080.D, Val1081.D, His1084.D, Leu1085.D                                            |                                                                                                                                      |
|                           | -13.9                                                                                                                     | Leu934.B, Phe935.B, Pro960.B, Arg964.B, Phe967.B, Tyr968.B, Trp1018.C, Val1021.C, Leu1022.C, Val1025.C                                  |                                                                                                                                      |
|                           | -12.6                                                                                                                     | Pro810.B, Leu815.B, Phe819.B, Phe822.B, Cys826.B, Leu883.B, Ile1080.B, Val1081.B, His1084.B, Leu1085.B                                  |                                                                                                                                      |
|                           | 6bwi_IC                                                                                                                   | -14.5                                                                                                                                   | Ile690.D, Met784.D, Val787.D, Val788.D, Leu791.D, Leu795.D, Phe910.D, Asn913.D, Leu916.D                                             |
|                           |                                                                                                                           | -14.5                                                                                                                                   | Ile690.C, Met784.C, Val787.C, Val788.C, Leu791.C, Leu795.C, Phe910.C, Asn913.C, Gln915.C, Leu916.C                                   |
|                           |                                                                                                                           | -14.1                                                                                                                                   | Trp864.A, Ile897.A, Met900.A, Val904.A, Leu907.A, Ile920.A, Val921.A, Val923.A, Ser924.A, Met927.A, Phe936.B, Trp940.B, Leu1023.B    |
|                           |                                                                                                                           | -14.1                                                                                                                                   | Trp864.C, Ile897.C, Met900.C, Val904.C, Leu907.C, Ile920.C, Val921.C, Val923.C, Ser924.C, Met927.C, Phe936.D, Trp940.D, Leu1023.D    |
| -14.0                     |                                                                                                                           | Phe936.A, Trp940.A, Leu1023.A, Trp864.D, Ile897.D, Met900.D, Val904.D, Leu907.D, Ile920.D, Val921.D, Val923.D, Ser924.D, Met927.D       |                                                                                                                                      |
| -13.7                     |                                                                                                                           | Phe931.A, Leu934.A, Phe935.A, Gly938.A, Leu941.A, Phe967.A, Val1025.B, Ile690.D, Leu916.D                                               |                                                                                                                                      |
| -13.6                     |                                                                                                                           | Val1025.A, Ile690.C, Leu916.C, Phe931.D, Leu934.D, Phe935.D, Gly938.D, Leu941.D, Phe967.D                                               |                                                                                                                                      |
| -13.6                     |                                                                                                                           | Ser863.C, Trp864.C, Cys867.C, Ile897.C, Val901.C, Leu1019.D, Leu1022.D, Leu1023.D                                                       |                                                                                                                                      |
| -13.6                     |                                                                                                                           | Ser863.A, Trp864.A, Cys867.A, Ile897.A, Val901.A, Leu1019.B, Leu1022.B, Leu1023.B                                                       |                                                                                                                                      |
| -14.7                     |                                                                                                                           | Ile690.A, Met784.A, Val787.A, Val788.A, Leu791.A, Leu795.A, Phe910.A, Asn913.A, Leu916.A                                                |                                                                                                                                      |
| -14.2                     |                                                                                                                           | Ile690.B, Met784.B, Val787.B, Val788.B, Leu791.B, Leu795.B, Phe910.B, Asn913.B, Leu916.B                                                |                                                                                                                                      |
| -14.2                     |                                                                                                                           | Trp864.B, Ile897.B, Met900.B, Val904.B, Leu907.B, Ile920.B, Val921.B, Val923.B, Ser924.B, Met927.B, Phe936.C, Trp940.C, Leu1023.C       |                                                                                                                                      |
| -13.5                     | Ser863.B, Trp864.B, Cys867.B, Ile897.B, Val901.B, Leu1019.C, Leu1022.C, Leu1023.C                                         |                                                                                                                                         |                                                                                                                                      |
| -14.5                     | Ile690.B, Phe931.C, Leu934.C, Phe935.C, Leu937.C, Gly938.C, Leu941.C, Phe967.C                                            |                                                                                                                                         |                                                                                                                                      |
| -14.4                     | Ile690.A, Phe931.B, Leu934.B, Phe935.B, Leu937.B, Gly938.B, Leu941.B, Phe967.B                                            |                                                                                                                                         |                                                                                                                                      |
| TRPM7                     |                                                                                                                           |                                                                                                                                         |                                                                                                                                      |
| TRPM7, closed, Mouse 5zx5 |                                                                                                                           |                                                                                                                                         |                                                                                                                                      |
| 5zx5_EC                   | -13.4                                                                                                                     | Leu1012.B, Pro1028.B, Ser1029.B, Trp1030.B, Leu1032.B, Ala1033.B, Ile1036.B, Leu864.C, Met868.C, Thr871.C, Phe872.C, Leu875.C, Leu976.C |                                                                                                                                      |
|                           | -13.2                                                                                                                     | Phe894.A, Ala897.A, Ile932.A, Phe936.A, Phe939.A, Gly940.A, Phe943.A, Gly944.A                                                          |                                                                                                                                      |
|                           | -13.1                                                                                                                     | Phe894.C, Ala897.C, Ile932.C, Phe936.C, Phe939.C, Gly940.C, Phe943.C, Gly944.C                                                          |                                                                                                                                      |
|                           | -14.6                                                                                                                     | Leu864.A, Met868.A, Thr871.A, Phe872.A, Leu976.A, Leu1012.D, Pro1028.D, Ser1029.D, Trp1030.D, Leu1032.D, Ala1033.D, Ile1036.D           |                                                                                                                                      |
|                           | -12.5                                                                                                                     | Phe894.B, Ala897.B, Ile932.B, Phe936.B, Phe939.B, Gly940.B, Phe943.B, Gly944.B                                                          |                                                                                                                                      |
|                           | -14.2                                                                                                                     | Leu1012.C, Pro1028.C, Ser1029.C, Trp1030.C, Leu1032.C, Ala1033.C, Ile1036.C, Leu864.D, Met868.D, Thr871.D, Phe872.D, Leu875.D, Leu976.D |                                                                                                                                      |
|                           | -13.8                                                                                                                     | Phe894.D, Ala897.D, Ile898.D, Ile932.D, Phe936.D, Phe939.D, Gly940.D, Phe943.D, Gly944.D                                                |                                                                                                                                      |
|                           | 5zx5_IC                                                                                                                   | -16.3                                                                                                                                   | Leu1072.A, Leu1076.A, Val1079.A, Val1083.A, Phe924.B, Leu967.B, Ile970.B, Phe971.B, Val974.B, Val990.B, Ile993.B, Gly994.B, Val997.B |
| -16.1                     |                                                                                                                           | Leu1076.B, Val1079.B, Val1083.B, Phe924.C, Leu967.C, Ile970.C, Phe971.C, Val974.C, Val990.C, Ile993.C, Gly994.C, Val997.C               |                                                                                                                                      |
| -16.0                     |                                                                                                                           | Phe924.A, Leu967.A, Ile970.A, Phe971.A, Val974.A, Val990.A, Ile993.A, Gly994.A, Val997.A, Leu1072.D, Leu1076.D, Val1079.D, Val1083.D    |                                                                                                                                      |
| -15.2                     |                                                                                                                           | Val1005.B, Leu1009.B, Leu1012.B, Ile1036.B, Val1037.B, Phe856.C, Trp857.C, Thr860.C, Leu864.C, Leu976.C, Phe979.C, Leu980.C, Val982.C   |                                                                                                                                      |
| -15.0                     |                                                                                                                           | Val1005.A, Leu1009.A, Leu1012.A, Val1037.A, Phe856.B, Leu864.B, Leu976.B, Phe979.B, Leu980.B, Val982.B                                  |                                                                                                                                      |
| -13.8                     |                                                                                                                           | Phe1075.B, Ala1078.B, Val1079.B, Phe1082.B, Val997.C, Ala998.C, Phe1001.C, Val1004.C, Val1037.C, Tyr1041.C                              |                                                                                                                                      |
| -13.5                     |                                                                                                                           | Val997.A, Ala998.A, Phe1001.A, Val1004.A, Val1037.A, Tyr1041.A, Phe1075.D, Ala1078.D, Val1079.D, Phe1082.D                              |                                                                                                                                      |
| -13.4                     |                                                                                                                           | Phe1075.A, Ala1078.A, Val1079.A, Phe1082.A, Val997.B, Ala998.B, Phe1001.B, Val1004.B, Val1037.B, Tyr1041.B                              |                                                                                                                                      |
| -16.1                     | Leu1076.B, Val1079.B, Val1083.B, Phe924.C, Leu967.C, Ile970.C, Phe971.C, Val974.C, Val990.C, Ile993.C, Gly994.C, Val997.C |                                                                                                                                         |                                                                                                                                      |

| PDB <sup>a</sup> | E <sup>b</sup> | Local Residues <sup>c</sup>                                                                                                                    |
|------------------|----------------|------------------------------------------------------------------------------------------------------------------------------------------------|
| -16.0            |                | Phe924.A, Leu967.A, Ile970.A, Phe971.A, Val974.A, Val990.A, Ile993.A, Gly994.A, Lys995.A, Val997.A, Leu1072.D, Leu1076.D, Val1079.D, Val1083.D |
| -15.6            |                | Leu1076.C, Val1079.C, Val1083.C, Phe924.D, Leu967.D, Ile970.D, Phe971.D, Val974.D, Val990.D, Ile993.D, Gly994.D, Val997.D                      |
| -15.4            |                | Val1005.C, Leu1009.C, Leu1012.C, Val1037.C, Phe856.D, Trp857.D, Thr860.D, Leu864.D, Leu976.D, Phe979.D, Leu980.D, Val982.D                     |
| -15.0            |                | Phe856.A, Thr860.A, Leu864.A, Leu976.A, Phe979.A, Leu980.A, Val982.A, Val1005.D, Leu1009.D, Leu1012.D, Val1037.D                               |
| -13.8            |                | Phe1075.B, Ala1078.B, Val1079.B, Phe1082.B, Val997.C, Ala998.C, Phe1001.C, Val1004.C, Val1037.C, Tyr1041.C                                     |
| -13.5            |                | Gly994.A, Val997.A, Ala998.A, Phe1001.A, Val1004.A, Val1037.A, Tyr1041.A, Phe1075.D, Ala1078.D, Val1079.D, Phe1082.D                           |
| -13.5            |                | Phe1075.C, Ala1078.C, Val1079.C, Phe1082.C, Val997.D, Ala998.D, Met1000.D, Phe1001.D, Val1004.D, Val1037.D, Tyr1041.D                          |

## TRPM8

TRPM8, closed, Collared Flycatcher, 6bpq

|         |        |
|---------|--------|
| 6bpq_EC | [none] |
| 6bpq_IC | [none] |

TRPM8, closed, with PtdIns(4,5)P2 and menthol analogue, Collared Flycatcher 6nr2

|         |         |                                                                                                                        |                                                                                          |
|---------|---------|------------------------------------------------------------------------------------------------------------------------|------------------------------------------------------------------------------------------|
| 6nr2_EC | -14.9   | Phe871.A, Val875.A, Val878.A, Val882.A, Trp895.A, Ile898.A, Phe899.A, Val902.A, Leu750.B, Ala753.B, Leu757.B, Leu842.B |                                                                                          |
|         | -14.9   | Leu750.A, Ala753.A, Leu757.A, Leu842.A, Phe871.D, Val875.D, Val878.D, Val882.D, Trp895.D, Ile898.D, Phe899.D, Val902.D |                                                                                          |
|         | -14.1   | Trp876.A, Phe880.A, Arg884.A, Ala909.A, Met910.A, Tyr962.A, Thr966.A, Leu969.A, Leu970.A, Phe911.B                     |                                                                                          |
|         | -13.9   | Phe911.A, Trp876.D, Phe880.D, Arg884.D, Ala909.D, Met910.D, Tyr962.D, Leu970.D                                         |                                                                                          |
|         | -13.9   | Trp876.C, Phe880.C, Arg884.C, Ala909.C, Met910.C, Tyr962.C, Leu970.C, Phe911.D                                         |                                                                                          |
|         | -12.8   | Trp953.C, Leu804.D, Phe807.D, Tyr808.D, Ala811.D, Phe815.D, Ser826.D, Ile830.D                                         |                                                                                          |
|         | -12.7   | Leu804.A, Phe807.A, Tyr808.A, Ala811.A, Phe815.A, Ser826.A, Ile830.A, Trp953.D                                         |                                                                                          |
|         | -14.9   | Phe871.B, Val875.B, Val878.B, Val882.B, Trp895.B, Ile898.B, Phe899.B, Val902.B, Leu750.C, Ala753.C, Leu757.C, Leu842.C |                                                                                          |
|         | -14.8   | Phe871.C, Val875.C, Val878.C, Val882.C, Trp895.C, Ile898.C, Phe899.C, Val902.C, Leu750.D, Ala753.D, Leu757.D, Leu842.D |                                                                                          |
|         | -13.9   | Trp876.B, Phe880.B, Arg884.B, Ala909.B, Met910.B, Tyr962.B, Leu970.B, Phe911.C                                         |                                                                                          |
|         | -12.8   | Trp953.B, Leu804.C, Phe807.C, Tyr808.C, Ala811.C, Phe815.C, Ser826.C, Ile830.C                                         |                                                                                          |
|         | -12.8   | Trp953.A, Leu804.B, Phe807.B, Tyr808.B, Ala811.B, Phe815.B, Ser826.B, Ile830.B                                         |                                                                                          |
|         | 6nr2_IC | -13.5                                                                                                                  | Leu797.A, Ile864.A, Phe867.A, Phe868.A, Phe871.A, Ile956.D, Val959.D, Cys960.D, Met963.D |
|         |         | -13.5                                                                                                                  | Ile956.C, Val959.C, Cys960.C, Met963.C, Leu797.D, Ile864.D, Phe867.D, Phe868.D, Phe871.D |
| -13.5   |         | Ile956.B, Val959.B, Cys960.B, Met963.B, Leu797.C, Ile864.C, Phe867.C, Phe868.C, Phe871.C                               |                                                                                          |
| -13.5   |         | Ile956.A, Val959.A, Cys960.A, Met963.A, Leu797.B, Ile864.B, Phe867.B, Phe868.B, Phe871.B                               |                                                                                          |

TRPM8, closed, with PtdIns(4,5)P2 and icilin, Collared Flycatcher 6nr3

|         |       |                                                                                                                                                      |
|---------|-------|------------------------------------------------------------------------------------------------------------------------------------------------------|
| 6nr3_EC | -13.8 | Phe871.B, Val875.B, Val878.B, Val882.B, Ile898.B, Phe899.B, Val902.B, Ile746.C, Leu750.C, Ala753.C, Tyr754.C, Leu757.C, Leu842.C, Phe846.C           |
|         | -13.7 | Phe871.C, Val875.C, Val878.C, Val882.C, Ile898.C, Phe899.C, Val902.C, Ile746.D, Leu749.D, Leu750.D, Ala753.D, Tyr754.D, Leu757.D, Leu842.D, Phe846.D |
|         | -13.6 | Ala909.B, Met910.B, Gly912.B, Tyr962.B, Ser965.B, Thr966.B, Leu969.B, Leu970.B, Phe911.C, Leu969.C                                                   |
|         | -13.3 | Leu908.A, Ala909.A, Met910.A, Gly912.A, Tyr962.A, Leu969.A, Leu970.A, Phe911.B, Leu969.B, Leu973.B                                                   |
|         | -13.3 | Leu908.C, Ala909.C, Met910.C, Phe911.C, Gly912.C, Tyr962.C, Leu969.C, Leu970.C, Phe911.D, Leu969.D, Leu973.D                                         |
|         | -13.1 | Phe911.A, Leu969.A, Leu973.A, Ala909.D, Met910.D, Phe911.D, Gly912.D, Tyr962.D, Leu969.D, Leu970.D                                                   |
|         | -13.9 | Phe871.A, Val875.A, Val878.A, Val882.A, Ile898.A, Phe899.A, Val902.A, Ile746.B, Leu750.B, Ala753.B, Tyr754.B, Leu757.B, Leu842.B, Phe846.B           |
|         | -13.8 | Ile746.A, Leu749.A, Leu750.A, Ala753.A, Tyr754.A, Leu757.A, Leu842.A, Phe846.A, Phe871.D, Val875.D, Val878.D, Val882.D, Ile898.D, Phe899.D, Val902.D |
| 6nr3_IC | -14.3 | Ile956.A, Leu797.B, Met801.B, Leu804.B, Leu833.B, Val837.B, Gln860.B, Met863.B, Ile864.B, Phe867.B                                                   |

| PDB <sup>a</sup>                                                       | E <sup>b</sup> | Local Residues <sup>c</sup>                                                                                                                |
|------------------------------------------------------------------------|----------------|--------------------------------------------------------------------------------------------------------------------------------------------|
|                                                                        | -14.3          | Ile956.B, Leu797.C, Met801.C, Leu804.C, Leu833.C, Val837.C, Gln860.C, Arg861.C, Met863.C, Ile864.C, Phe867.C                               |
|                                                                        | -13.6          | Ile696.C, Leu699.C, Phe700.C, Phe735.C, Phe738.C, Ser739.C, Val742.C, Ile743.C, Ile746.C                                                   |
|                                                                        | -13.6          | Ile696.D, Phe700.D, Phe735.D, Phe738.D, Ser739.D, Val742.D, Ile743.D, Ile746.D                                                             |
|                                                                        | -14.3          | Leu797.A, Met801.A, Leu804.A, Leu833.A, Val837.A, Gln860.A, Met863.A, Ile864.A, Phe867.A, Ile956.D                                         |
|                                                                        | -14.3          | Ile956.C, Leu797.D, Met801.D, Leu804.D, Leu833.D, Val837.D, Gln860.D, Met863.D, Ile864.D, Phe867.D                                         |
|                                                                        | -13.6          | Ile696.B, Leu699.B, Phe700.B, Phe735.B, Phe738.B, Ser739.B, Val742.B, Ile743.B, Ile746.B                                                   |
|                                                                        | -13.6          | Ile696.A, Leu699.A, Phe700.A, Phe735.A, Phe738.A, Ser739.A, Val742.A, Ile743.A, Ile746.A                                                   |
| TRPM8, closed, with PtdIns(4,5)P2 and icilin, Collared Flycatcher,6nr4 |                |                                                                                                                                            |
| 6nr4_EC                                                                |                | [none]                                                                                                                                     |
| 6nr4_IC                                                                | -13.4          | Ile956.A, Val959.A, Met963.A, Leu797.B, Ile864.B, Phe867.B, Phe868.B, Phe871.B, Ala874.B, Tyr907.B                                         |
|                                                                        | -13.3          | Ile956.B, Val959.B, Cys960.B, Met963.B, Leu797.C, Ile864.C, Phe867.C, Phe868.C, Phe871.C, Arg850.D                                         |
|                                                                        | -12.8          | Leu970.A, Leu973.A, Leu974.A, Met977.A, Phe978.A, Leu973.B, Leu974.B, Met977.B, Phe978.B, Met977.C, Phe978.C, Leu974.D, Met977.D, Phe978.D |
|                                                                        | -12.7          | Leu973.A, Leu974.A, Met977.A, Phe978.A, Met977.B, Phe978.B, Leu974.C, Met977.C, Phe978.C, Leu973.D, Leu974.D, Met977.D, Phe978.D           |
|                                                                        | -13.3          | Leu797.A, Ile864.A, Phe867.A, Phe868.A, Phe871.A, Tyr907.A, Ile956.D, Val959.D, Met963.D                                                   |
|                                                                        | -13.3          | Ile956.C, Val959.C, Met963.C, Leu797.D, Ile864.D, Phe867.D, Phe868.D, Phe871.D, Ala874.D, Tyr907.D                                         |
| TRPML1                                                                 |                |                                                                                                                                            |
| TRPML1, closed, Human 5wj5                                             |                |                                                                                                                                            |
| 5wj5_EC                                                                | -13.3          | Ile73.A, Leu74.A, Ile81.A, Trp398.A, Gln484.C, Trp491.C, Phe441.D, Leu457.D, Ser458.D                                                      |
|                                                                        | -13.2          | Phe441.A, Leu457.A, Ser458.A, Ile73.B, Leu74.B, Ile81.B, Trp398.B, Gln484.D, Trp491.D                                                      |
|                                                                        | -13.0          | Ala433.A, Tyr436.A, Leu437.A, Ser456.A, Leu457.A, Ser458.A, Ser461.A, Trp491.D, Tyr499.D                                                   |
|                                                                        | -12.9          | Leu85.A, Trp491.C, Tyr499.C, Ala433.D, Tyr436.D, Leu437.D, Ser456.D, Leu457.D, Ser458.D, Ser461.D                                          |
|                                                                        | -12.8          | Trp491.B, Tyr499.B, Ala433.C, Tyr436.C, Leu437.C, Ser456.C, Leu457.C, Ser458.C, Ser461.C, Leu85.D                                          |
|                                                                        | -12.7          | Gln484.B, Trp491.B, Phe441.C, Ser456.C, Leu457.C, Ser458.C, Ile73.D, Leu74.D, Ile81.D, Trp398.D                                            |
|                                                                        | -13.1          | Gln484.A, Trp491.A, Phe441.B, Leu457.B, Ser458.B, Ile73.C, Leu74.C, Ile81.C, Trp398.C                                                      |
|                                                                        | -13.0          | Trp491.A, Tyr499.A, Ala433.B, Tyr436.B, Leu437.B, Ser456.B, Leu457.B, Ser458.B, Ser461.B                                                   |
| 5wj5_IC                                                                | -15.2          | Leu357.A, Ile388.A, Thr392.A, Leu395.A, Leu396.A, Val399.A, Arg403.A, Arg419.A, Leu422.A, Phe493.D, Leu496.D                               |
|                                                                        | -13.7          | Leu492.C, Phe493.C, Leu496.C, Gly353.D, Ile356.D, Leu357.D, Thr360.D, Leu396.D                                                             |
|                                                                        | -13.6          | Phe493.C, Leu496.C, Ile388.D, Thr392.D, Leu396.D, Leu418.D, Arg419.D, Leu422.D                                                             |
|                                                                        | -12.8          | Val434.B, Val70.C, Ile73.C, Leu74.C, Ile81.C, Trp398.C, Val401.C, Tyr404.C, Leu405.C, Phe408.C                                             |
|                                                                        | -12.9          | Val434.A, Val70.B, Ile73.B, Leu74.B, Ile81.B, Trp398.B, Val401.B, Tyr404.B, Leu405.B, Phe408.B                                             |
|                                                                        | -12.9          | Val70.A, Ile73.A, Leu74.A, Ile81.A, Trp398.A, Val401.A, Tyr404.A, Leu405.A, Phe408.A, Val434.D                                             |
|                                                                        | -12.8          | Val70.D, Ile73.D, Leu74.D, Ile81.D, Trp398.D, Val401.D, Tyr404.D, Leu405.D, Phe408.D                                                       |
|                                                                        | -12.6          | Ile356.A, Leu357.A, Thr360.A, Leu364.A, Val385.A, Ile388.A, Leu389.A, Leu489.D                                                             |
|                                                                        | -14.9          | Phe493.A, Leu496.A, Leu357.B, Ile388.B, Thr392.B, Leu396.B, Val399.B, Arg403.B, Arg419.B                                                   |
|                                                                        | -13.8          | Phe493.B, Leu496.B, Ile388.C, Thr392.C, Leu396.C, Leu418.C, Arg419.C, Leu422.C                                                             |
|                                                                        | -12.6          | Ile356.C, Leu357.C, Thr360.C, Leu364.C, Val385.C, Leu389.C, Thr392.C, Leu396.C                                                             |
| TRPML1, open, with agonist, Human 5wj9                                 |                |                                                                                                                                            |
| 5wj9_EC                                                                | -13.4          | Phe441.B, Trp444.B, Ile73.C, Leu74.C, Thr77.C, Val78.C, Ile81.C, Trp398.C                                                                  |
|                                                                        | -12.4          | Phe441.A, Trp444.A, Ile73.B, Leu74.B, Thr77.B, Val78.B, Ile81.B, Leu85.B, Trp398.B                                                         |
|                                                                        | -12.2          | Thr77.A, Val78.A, Ile81.A, Leu82.A, Leu85.A, Trp398.A, Leu437.D, Phe441.D, Trp444.D, Leu457.D                                              |
|                                                                        | -12.0          | Leu437.C, Phe441.C, Trp444.C, Thr77.D, Val78.D, Ile81.D, Leu82.D, Leu85.D, Trp398.D                                                        |
| 5wj9_IC                                                                | -13.5          | Leu492.C, Phe493.C, Leu496.C, Gly353.D, Ile356.D, Leu357.D, Thr360.D, Ile388.D, Thr392.D, Leu396.D                                         |

| PDB <sup>a</sup>           | E <sup>b</sup> | Local Residues <sup>c</sup>                                                                                  |
|----------------------------|----------------|--------------------------------------------------------------------------------------------------------------|
| -13.4                      |                | Leu492.B, Phe493.B, Leu496.B, Gly353.C, Ile356.C, Leu357.C, Thr360.C, Ile388.C, Thr392.C, Leu396.C, Arg419.C |
| -13.0                      |                | Gln495.C, Tyr499.C, Met508.C, Leu418.D, Leu422.D, Val425.D, Met426.D, Cys429.D, Ser461.D                     |
| -13.0                      |                | Val70.A, Ile73.A, Leu74.A, Thr77.A, Val78.A, Ile81.A, Trp398.A, Tyr404.A, Phe441.D                           |
| -12.9                      |                | Gln495.B, Tyr499.B, Met508.B, Leu418.C, Leu422.C, Val425.C, Met426.C, Cys429.C, Ser461.C                     |
| -12.7                      |                | Lys62.A, Cys64.A, Met67.A, Leu68.A, Val71.A, Val75.A, Phe301.A, Val304.A                                     |
| -12.7                      |                | Phe441.C, Val70.D, Ile73.D, Leu74.D, Thr77.D, Val78.D, Ile81.D, Trp398.D, Tyr404.D                           |
| -12.3                      |                | Lys62.D, Cys64.D, Met67.D, Leu68.D, Val71.D, Val75.D, Phe301.D, Val304.D                                     |
| -13.4                      |                | Leu492.A, Phe493.A, Leu496.A, Gly353.B, Ile356.B, Leu357.B, Thr360.B, Ile388.B, Thr392.B, Leu396.B, Arg419.B |
| -13.0                      |                | Gln495.A, Tyr499.A, Met508.A, Leu418.B, Leu422.B, Val425.B, Met426.B, Cys429.B, Ser461.B                     |
| -13.0                      |                | Phe441.B, Val70.C, Ile73.C, Leu74.C, Thr77.C, Val78.C, Ile81.C, Trp398.C, Tyr404.C                           |
| -12.9                      |                | Leu418.A, Leu422.A, Val425.A, Met426.A, Cys429.A, Ser461.A, Gln495.D, Leu496.D, Tyr499.D, Met508.D           |
| -12.8                      |                | Phe441.A, Val70.B, Ile73.B, Leu74.B, Thr77.B, Val78.B, Ile81.B, Trp398.B, Tyr404.B                           |
| -12.7                      |                | Lys62.B, Cys64.B, Met67.B, Leu68.B, Val71.B, Val75.B, Phe301.B, Val304.B                                     |
| -12.4                      |                | Lys62.C, Cys64.C, Met67.C, Leu68.C, Val71.C, Val75.C, Phe301.C, Val304.C                                     |
| TRPM1, closed, Mouse 5wpq  |                |                                                                                                              |
| 5wpq_EC                    |                | [none]                                                                                                       |
| 5wpq_IC                    |                |                                                                                                              |
| -14.1                      |                | Phe493.C, Gly353.D, Trp354.D, Ile356.D, Leu357.D, Thr360.D, Ile388.D, Thr392.D, Leu396.D                     |
| -14.1                      |                | Phe493.B, Gly353.C, Trp354.C, Ile356.C, Leu357.C, Thr360.C, Ile388.C, Thr392.C, Leu396.C                     |
| -14.0                      |                | Phe493.A, Gly353.B, Trp354.B, Ile356.B, Leu357.B, Thr360.B, Ile388.B, Thr392.B, Leu396.B                     |
| -13.2                      |                | Lys62.C, Pro63.C, Cys64.C, Met67.C, Leu68.C, Val71.C, Val303.C, Val304.C, Leu307.C, Thr308.C                 |
| -13.2                      |                | Lys62.D, Cys64.D, Met67.D, Leu68.D, Val71.D, Val303.D, Val304.D, Leu307.D, Thr308.D                          |
| -12.7                      |                | Val70.D, Ile73.D, Leu74.D, Val78.D, Ile81.D, Trp398.D, Val401.D, Tyr404.D, Leu405.D                          |
| -12.3                      |                | Val70.C, Ile73.C, Leu74.C, Thr77.C, Val78.C, Ile81.C, Trp398.C, Val401.C, Tyr404.C, Leu405.C                 |
| -14.0                      |                | Gly353.A, Trp354.A, Ile356.A, Leu357.A, Thr360.A, Ile388.A, Thr392.A, Leu396.A, Phe493.D                     |
| -13.2                      |                | Lys62.A, Cys64.A, Met67.A, Leu68.A, Val71.A, Val303.A, Val304.A, Leu307.A, Thr308.A                          |
| -13.2                      |                | Lys62.B, Pro63.B, Cys64.B, Met67.B, Leu68.B, Val71.B, Val303.B, Val304.B, Leu307.B, Thr308.B                 |
| -12.6                      |                | Val70.A, Ile73.A, Leu74.A, Val78.A, Ile81.A, Trp398.A, Val401.A, Tyr404.A, Leu405.A                          |
| -12.6                      |                | Val70.B, Ile73.B, Leu74.B, Val78.B, Ile81.B, Trp398.B, Val401.B, Tyr404.B, Leu405.B                          |
| TRPM1, closed, Mouse 5wpt  |                |                                                                                                              |
| 5wpt_EC                    |                | [none]                                                                                                       |
| 5wpt_IC                    |                |                                                                                                              |
| -13.4                      |                | Tyr439.C, Phe493.C, Leu496.C, Tyr497.C, Gly353.D, Trp354.D, Leu357.D, Leu395.D, Leu396.D, Val399.D           |
| -13.3                      |                | Tyr439.A, Phe493.A, Leu496.A, Tyr497.A, Gly353.B, Leu357.B, Leu395.B, Leu396.B, Val399.B                     |
| -13.3                      |                | Tyr439.B, Phe493.B, Leu496.B, Tyr497.B, Gly353.C, Trp354.C, Leu357.C, Leu395.C, Leu396.C, Val399.C           |
| -13.4                      |                | Gly353.A, Leu357.A, Leu395.A, Leu396.A, Val399.A, Tyr439.D, Phe493.D, Leu496.D, Tyr497.D                     |
| -12.9                      |                | Ile356.C, Leu357.C, Thr360.C, Leu364.C, Ile388.C, Leu389.C, Thr392.C, Leu396.C                               |
| -12.8                      |                | Gln495.C, Leu496.C, Tyr499.C, Ser500.C, Leu504.C, Met508.C, Leu422.D, Met426.D                               |
| -12.7                      |                | Ile356.B, Leu357.B, Thr360.B, Leu364.B, Ile388.B, Leu389.B, Thr392.B, Leu396.B                               |
| -12.3                      |                | Phe441.B, Val70.C, Ile73.C, Leu74.C, Thr77.C, Val78.C, Ile81.C, Trp398.C, Tyr404.C                           |
| -12.5                      |                | Val70.B, Leu74.B, Thr77.B, Val78.B, Ile81.B, Trp398.B, Tyr404.B, Leu405.B, Phe407.B                          |
| -12.6                      |                | Ile356.A, Leu357.A, Thr360.A, Leu364.A, Ile388.A, Leu389.A, Thr392.A, Leu396.A                               |
| -12.6                      |                | Val70.A, Ile73.A, Leu74.A, Thr77.A, Val78.A, Ile81.A, Trp398.A, Tyr404.A, Leu405.A                           |
| TRPM1, closed, Mouse, 5wpv |                |                                                                                                              |
| 5wpv_EC                    |                | [none]                                                                                                       |



| PDB <sup>a</sup>                                                | E <sup>b</sup>                                                                              | Local Residues <sup>c</sup>                                                                                                                |
|-----------------------------------------------------------------|---------------------------------------------------------------------------------------------|--------------------------------------------------------------------------------------------------------------------------------------------|
| 5wpv_IC                                                         | -14.4                                                                                       | Arg427.A, Cys430.A, Val434.A, Leu74.B, Thr77.B, Trp398.B, Val401.B, Leu405.B, Phe408.B, Tyr411.B                                           |
|                                                                 | -14.2                                                                                       | Leu74.A, Thr77.A, Trp398.A, Val401.A, Leu405.A, Phe408.A, Tyr411.A, Arg427.D, Cys430.D, Val434.D                                           |
|                                                                 | -14.5                                                                                       | Arg427.C, Cys430.C, Val434.C, Leu74.D, Thr77.D, Trp398.D, Val401.D, Leu405.D, Phe408.D, Tyr411.D                                           |
|                                                                 | -14.4                                                                                       | Arg427.B, Cys430.B, Val434.B, Leu74.C, Thr77.C, Trp398.C, Val401.C, Leu405.C, Phe408.C, Tyr411.C                                           |
| TRPM1, closed, plus PtdIns(3,5)P2, Human 6e7p                   |                                                                                             |                                                                                                                                            |
| 6e7p_EC                                                         | -13.6                                                                                       | Phe441.A, Ser456.A, Leu457.A, Ser458.A, Ile73.B, Ile81.B, Trp398.B, Gln484.D, Trp491.D                                                     |
|                                                                 | -13.6                                                                                       | Ile73.A, Ile81.A, Trp398.A, Gln484.C, Trp491.C, Phe441.D, Ser456.D, Leu457.D, Ser458.D                                                     |
|                                                                 | -13.0                                                                                       | Ala433.A, Tyr436.A, Leu437.A, Leu457.A, Ser458.A, Ser461.A, Gln484.D, Trp491.D, Tyr499.D                                                   |
|                                                                 | -12.9                                                                                       | Gln484.C, Trp491.C, Tyr499.C, Cys429.D, Ala433.D, Tyr436.D, Leu437.D, Leu457.D, Ser458.D, Ser461.D                                         |
|                                                                 | -13.5                                                                                       | Gln484.A, Trp491.A, Phe441.B, Ser456.B, Leu457.B, Ser458.B, Ile73.C, Ile81.C, Trp398.C                                                     |
|                                                                 | -13.5                                                                                       | Gln484.B, Trp491.B, Phe441.C, Ser456.C, Leu457.C, Ser458.C, Ile73.D, Ile81.D, Trp398.D                                                     |
| 6e7p_IC                                                         | -13.0                                                                                       | Gln484.B, Trp491.B, Tyr499.B, Cys429.C, Ala433.C, Tyr436.C, Leu437.C, Leu457.C, Ser458.C, Ser461.C                                         |
|                                                                 | -14.4                                                                                       | Tyr439.C, Phe493.C, Leu496.C, Tyr497.C, Ser500.C, Leu504.C, Thr392.D, Leu395.D, Leu396.D, Val399.D, Ile415.D, Leu418.D, Arg419.D, Leu422.D |
|                                                                 | -14.4                                                                                       | Thr392.A, Leu395.A, Val399.A, Ile402.A, Ile415.A, Leu418.A, Arg419.A, Leu422.A, Ile435.D, Tyr439.D, Phe493.D, Leu496.D, Tyr497.D, Leu504.D |
|                                                                 | -14.3                                                                                       | Tyr439.A, Phe493.A, Leu496.A, Tyr497.A, Ser500.A, Leu504.A, Thr392.B, Leu395.B, Leu396.B, Val399.B, Ile402.B, Ile415.B, Leu418.B, Leu422.B |
|                                                                 | -13.5                                                                                       | Phe313.D, Ala317.D, Arg318.D, Leu320.D, Leu321.D, Ile356.D, Val359.D, Val363.D                                                             |
|                                                                 | -13.1                                                                                       | Cys430.A, Ile73.B, Leu74.B, Thr77.B, Val78.B, Trp398.B, Val401.B, Leu405.B, Phe408.B, Tyr411.B                                             |
|                                                                 | -13.0                                                                                       | Phe493.A, Gly353.B, Ile356.B, Leu357.B, Thr360.B, Ile388.B, Thr392.B, Leu396.B                                                             |
|                                                                 | -13.0                                                                                       | Gly353.A, Ile356.A, Leu357.A, Thr360.A, Ile388.A, Thr392.A, Leu396.A, Phe493.D                                                             |
|                                                                 | -12.9                                                                                       | Phe493.C, Gly353.D, Trp354.D, Ile356.D, Leu357.D, Thr360.D, Ile388.D, Thr392.D, Leu396.D                                                   |
|                                                                 | -12.8                                                                                       | Ile73.A, Leu74.A, Thr77.A, Val78.A, Ile81.A, Trp398.A, Val401.A, Tyr404.A, Leu405.A, Phe408.A, Tyr411.A, Cys430.D                          |
|                                                                 | -12.4                                                                                       | Met426.A, Arg427.A, Cys430.A, Ala433.A, Tyr436.A, Leu437.A, Ser461.A, Tyr411.B, Tyr499.D                                                   |
|                                                                 | -13.3                                                                                       | Phe313.B, Ala317.B, Arg318.B, Leu320.B, Leu321.B, Ile356.B, Val359.B, Val363.B                                                             |
|                                                                 | -13.3                                                                                       | Tyr499.B, Met426.C, Arg427.C, Cys429.C, Cys430.C, Ala433.C, Tyr436.C, Leu437.C, Ser461.C, Tyr411.D                                         |
|                                                                 | -14.4                                                                                       | Tyr439.B, Phe493.B, Leu496.B, Tyr497.B, Ser500.B, Leu504.B, Thr392.C, Leu395.C, Leu396.C, Val399.C, Ile415.C, Leu418.C, Leu422.C           |
|                                                                 | -13.5                                                                                       | Phe313.C, Ala317.C, Arg318.C, Leu320.C, Leu321.C, Ile356.C, Val359.C, Val363.C                                                             |
| -13.2                                                           | Val70.C, Ile73.C, Leu74.C, Trp398.C, Val401.C, Tyr404.C, Leu405.C, Phe408.C, Tyr411.C       |                                                                                                                                            |
| -13.0                                                           | Phe493.B, Gly353.C, Trp354.C, Ile356.C, Leu357.C, Thr360.C, Ile388.C, Thr392.C, Leu396.C    |                                                                                                                                            |
| -13.0                                                           | Cys430.C, Val434.C, Thr77.D, Trp398.D, Val401.D, Leu405.D, Phe408.D, Tyr411.D               |                                                                                                                                            |
| -12.5                                                           | Tyr499.A, Met426.B, Arg427.B, Cys430.B, Ala433.B, Leu437.B, Ser461.B, Tyr411.C              |                                                                                                                                            |
| TRPML1, closed, plus PtdIns(4,5)P2, Human 6e7y                  |                                                                                             |                                                                                                                                            |
| 6e7y_EC                                                         |                                                                                             | [none]                                                                                                                                     |
| 6e7y_IC                                                         | -14.2                                                                                       | Leu357.A, Thr360.A, Leu364.A, Ile388.A, Leu389.A, Thr392.A, Leu396.A, Arg419.A                                                             |
|                                                                 | -13.5                                                                                       | Pro63.B, Cys64.B, Met67.B, Leu68.B, Val71.B, Phe301.B, Val304.B, Thr308.B                                                                  |
|                                                                 | -14.0                                                                                       | Leu492.A, Phe493.A, Leu496.A, Leu357.B, Ile388.B, Thr392.B, Leu396.B, Arg419.B                                                             |
|                                                                 | -13.5                                                                                       | Pro63.A, Cys64.A, Met67.A, Leu68.A, Val71.A, Phe301.A, Val304.A, Thr308.A                                                                  |
|                                                                 | -13.7                                                                                       | Pro63.C, Cys64.C, Lys65.C, Leu66.C, Met67.C, Leu68.C, Val71.C, Leu300.C, Val304.C, Thr308.C                                                |
|                                                                 | -13.6                                                                                       | Phe493.C, Gly353.D, Ile356.D, Leu357.D, Thr360.D, Leu364.D, Ile388.D, Thr392.D, Leu396.D                                                   |
|                                                                 | -13.5                                                                                       | Phe493.B, Gly353.C, Ile356.C, Leu357.C, Thr360.C, Ile388.C, Thr392.C, Leu396.C                                                             |
| -13.7                                                           | Pro63.D, Cys64.D, Lys65.D, Leu66.D, Met67.D, Leu68.D, Val71.D, Leu300.D, Val304.D, Thr308.D |                                                                                                                                            |
| TRPML1, open, plus PtdIns(3,5)P2 and agonist ML-SA1, Human 6e7z |                                                                                             |                                                                                                                                            |
| 6e7z_EC                                                         | -12.4                                                                                       | Phe441.B, Ile73.C, Leu74.C, Thr77.C, Val78.C, Ile81.C, Leu82.C, Leu85.C, Trp398.C                                                          |

| PDB <sup>a</sup>                               | E <sup>b</sup> | Local Residues <sup>c</sup>                                                                                                                |
|------------------------------------------------|----------------|--------------------------------------------------------------------------------------------------------------------------------------------|
|                                                | -12.4          | Phe441.C, Leu74.D, Thr77.D, Val78.D, Ile81.D, Leu82.D, Leu85.D, Trp398.D                                                                   |
|                                                | -12.4          | Phe441.A, Ile73.B, Leu74.B, Thr77.B, Val78.B, Ile81.B, Leu82.B, Leu85.B, Trp398.B                                                          |
|                                                | -12.3          | Leu74.A, Thr77.A, Val78.A, Ile81.A, Leu82.A, Leu85.A, Trp398.A, Phe441.D                                                                   |
| 6e7z_IC                                        | -13.6          | Val434.C, Leu437.C, Phe441.C, Val70.D, Ile73.D, Trp398.D, Val401.D, Tyr404.D, Leu405.D                                                     |
|                                                | -13.6          | Cys430.B, Val434.B, Leu437.B, Phe441.B, Leu74.C, Thr77.C, Trp398.C, Leu405.C, Tyr411.C                                                     |
|                                                | -13.0          | Phe493.B, Leu496.B, Trp354.C, Leu357.C, Thr392.C, Leu395.C, Leu396.C, Val399.C                                                             |
|                                                | -13.0          | Phe493.A, Leu496.A, Trp354.B, Leu357.B, Thr392.B, Leu395.B, Leu396.B, Val399.B, Leu418.B                                                   |
|                                                | -13.2          | Trp354.A, Ile356.A, Leu357.A, Thr360.A, Leu364.A, Ile388.A, Thr392.A, Leu396.A                                                             |
|                                                | -14.2          | Val70.B, Ile73.B, Leu74.B, Thr77.B, Trp398.B, Val401.B, Tyr404.B, Leu405.B                                                                 |
|                                                | -13.4          | Tyr439.C, Phe493.C, Leu496.C, Tyr497.C, Ser500.C, Leu504.C, Trp354.D, Thr392.D, Leu395.D, Leu396.D, Val399.D, Ile402.D, Ile415.D, Leu418.D |
|                                                | -13.4          | Leu74.A, Thr77.A, Trp398.A, Leu405.A, Tyr411.A, Cys430.D, Val434.D, Leu437.D, Phe441.D                                                     |
| TRPML3                                         |                |                                                                                                                                            |
| TRPML3, closed, with CHS and PE, Marmoset 5w3s |                |                                                                                                                                            |
| 5w3s_EC                                        | -13.9          | Trp475.C, Tyr483.C, Ala420.D, Tyr423.D, Leu424.D, Leu444.D, Asn445.D, Ser448.D                                                             |
|                                                | -13.9          | Trp475.A, Tyr483.A, Ala420.C, Tyr423.C, Leu424.C, Leu444.C, Asn445.C, Ser448.C                                                             |
|                                                | -13.9          | Ala420.A, Tyr423.A, Leu424.A, Leu444.A, Asn445.A, Ser448.A, Trp475.B, Tyr483.B                                                             |
|                                                | -13.2          | Phe428.C, Leu444.C, Ile70.D, Ala71.D, Thr74.D, Val78.D, Leu82.D, Trp385.D                                                                  |
|                                                | -12.8          | Ile70.B, Ala71.B, Thr74.B, Val78.B, Leu82.B, Trp385.B, Phe428.D, Leu444.D                                                                  |
|                                                | -13.2          | Ile67.C, Leu68.C, Ala71.C, Met72.C, Ile75.C, Leu79.C, Asn284.C, Phe288.C                                                                   |
|                                                | -13.3          | Phe428.A, Leu444.A, Ile70.C, Ala71.C, Thr74.C, Val78.C, Leu82.C, Trp385.C                                                                  |
|                                                | -13.2          | Ile70.A, Ala71.A, Thr74.A, Val78.A, Leu82.A, Trp385.A, Phe428.B, Leu444.B                                                                  |
| 5w3s_IC                                        | -15.5          | Phe477.C, Gly340.D, Trp341.D, Met344.D, Ile347.D, Thr379.D, Leu383.D, Leu386.D, Gln406.D                                                   |
|                                                | -15.4          | Gly340.C, Trp341.C, Met344.C, Ile347.C, Thr379.C, Leu383.C, Leu386.C, Gln406.C                                                             |
|                                                | -13.3          | Met421.C, Phe428.C, Cys50.D, Ile67.D, Ile70.D, Ala71.D, Thr74.D, Trp385.D, Val388.D, Tyr391.D, Leu392.D, Phe394.D                          |
|                                                | -13.2          | Met421.A, Phe428.A, Cys50.C, Ile67.C, Ile70.C, Ala71.C, Thr74.C, Trp385.C, Val388.C, Tyr391.C, Leu392.C                                    |
|                                                | -13.2          | Cys50.B, Ile67.B, Ile70.B, Ala71.B, Thr74.B, Trp385.B, Val388.B, Tyr391.B, Leu392.B, Met421.D, Phe428.D                                    |
|                                                | -12.8          | Trp385.B, Leu392.B, Phe395.B, Tyr398.B, Cys417.D, Met421.D, Leu424.D, Phe428.D                                                             |
|                                                | -12.8          | Cys417.C, Met421.C, Leu424.C, Phe428.C, Trp385.D, Leu392.D, Phe395.D, Tyr398.D                                                             |
|                                                | -15.5          | Gly340.A, Trp341.A, Met344.A, Ile347.A, Thr379.A, Leu383.A, Leu386.A, Gln406.A                                                             |
|                                                | -15.4          | Gly340.B, Trp341.B, Met344.B, Ile347.B, Thr379.B, Leu383.B, Leu386.B, Gln406.B                                                             |
|                                                | -13.2          | Cys50.A, Ile67.A, Ile70.A, Ala71.A, Thr74.A, Trp385.A, Val388.A, Tyr391.A, Leu392.A, Phe394.A, Phe395.A, Met421.B, Phe428.B                |
|                                                | -12.8          | Trp385.A, Leu392.A, Phe395.A, Tyr398.A, Cys417.B, Met421.B, Leu424.B, Phe428.B                                                             |
|                                                | -12.8          | Cys417.A, Met421.A, Leu424.A, Phe428.A, Trp385.C, Leu392.C, Phe395.C, Tyr398.C                                                             |
| TRPML3, open, with agonist ML-SA1, Human 6ayf  |                |                                                                                                                                            |
| 6ayf_EC                                        | -13.3          | Ala420.B, Tyr423.B, Leu424.B, Cys427.B, Ser443.B, Leu444.B, Asn445.B, Ser448.B, Tyr472.C, Trp475.C, Tyr483.C                               |
|                                                | -13.2          | Trp475.A, Tyr483.A, Tyr423.D, Leu424.D, Cys427.D, Ser443.D, Leu444.D, Asn445.D, Ser448.D                                                   |
|                                                | -13.1          | Ala420.C, Tyr423.C, Leu424.C, Cys427.C, Leu444.C, Asn445.C, Ser448.C, Tyr472.D, Trp475.D, Tyr483.D                                         |
|                                                | -12.7          | Phe428.A, Trp431.A, Ser443.A, Leu444.A, Asn445.A, Ala71.D, Val78.D, Leu82.D, Trp385.D                                                      |
|                                                | -12.7          | Ala71.A, Val78.A, Leu82.A, Gln85.A, Trp385.A, Phe428.B, Trp431.B, Ser443.B, Leu444.B, Asn445.B                                             |
|                                                | -13.4          | Ile70.B, Ala71.B, Thr74.B, Val78.B, Leu82.B, Trp385.B, Phe428.C, Leu444.C                                                                  |
|                                                | -13.3          | Ala420.A, Tyr423.A, Leu424.A, Cys427.A, Ser443.A, Leu444.A, Asn445.A, Ser448.A, Tyr472.B, Trp475.B, Tyr483.B                               |
|                                                | -13.0          | Ile70.C, Ala71.C, Thr74.C, Val78.C, Leu82.C, Trp385.C, Phe428.D, Leu444.D                                                                  |
| 6ayf_IC                                        | -14.0          | Glu51.A, Leu63.A, Ile67.A, Ile70.A, Ala71.A, Thr74.A, Ile75.A, Trp385.A, Val388.A, Tyr391.A, Leu392.A, Phe394.A, Phe395.A                  |

| PDB <sup>a</sup>                                      | E <sup>b</sup> | Local Residues <sup>c</sup>                                                                                                                   |
|-------------------------------------------------------|----------------|-----------------------------------------------------------------------------------------------------------------------------------------------|
| -14.0                                                 |                | Leu63.B, Ile67.B, Ile70.B, Ala71.B, Thr74.B, Ile75.B, Trp385.B, Val388.B, Tyr391.B, Leu392.B, Phe394.B, Phe395.B                              |
| -14.0                                                 |                | Leu63.C, Ile67.C, Ile70.C, Ala71.C, Thr74.C, Ile75.C, Trp385.C, Val388.C, Tyr391.C, Leu392.C, Phe394.C, Phe395.C                              |
| -13.4                                                 |                | Trp341.B, Met344.B, Met382.B, Leu383.B, Leu386.B, Ile402.B, Leu405.B, Gln406.B, Ile422.C, Phe477.C, Ile480.C, Tyr481.C, Ser484.C, Leu488.C    |
| -13.3                                                 |                | Trp341.C, Met344.C, Met382.C, Leu383.C, Leu386.C, Ile402.C, Leu405.C, Gln406.C, Ile422.D, Phe477.D, Ile480.D, Tyr481.D, Leu488.D              |
| -14.0                                                 |                | Leu63.D, Ile67.D, Ile70.D, Ala71.D, Thr74.D, Ile75.D, Trp385.D, Val388.D, Tyr391.D, Leu392.D, Phe394.D, Phe395.D                              |
| -13.5                                                 |                | Ile422.A, Phe477.A, Ile480.A, Tyr481.A, Leu488.A, Trp341.D, Met344.D, Met382.D, Leu383.D, Leu386.D, Ile402.D, Leu405.D, Gln406.D              |
| -13.5                                                 |                | Trp341.A, Met344.A, Met382.A, Leu383.A, Leu386.A, Ile402.A, Leu405.A, Gln406.A, Phe477.B, Ile480.B, Tyr481.B, Ser484.B, Leu488.B              |
| TRPN                                                  |                |                                                                                                                                               |
| TRPN (NOMPC), closed, with PC, <i>Drosophila</i> 5vkq |                |                                                                                                                                               |
| 5vkq_EC                                               | -12.8          | Phe1452.A, Met1456.A, Phe1486.A, Val1489.A, His1492.A, Pro1493.A, Ile1312.D, Met1315.D, Ile1316.D, Ser1319.D, Thr1324.D, Phe1409.D            |
|                                                       | -12.6          | Ile1279.C, Ile1312.C, Met1315.C, Ile1316.C, Ser1319.C, Thr1324.C, Phe1452.D, Met1456.D, Phe1486.D, His1492.D, Pro1493.D                       |
|                                                       | -12.4          | Tyr1337.D, Trp1338.D, Val1341.D, Gly1342.D, Ile1345.D, Trp1346.D, Pro1592.D, Leu1593.D, Val1596.D                                             |
|                                                       | -12.4          | Trp1338.C, Val1341.C, Gly1342.C, Ile1345.C, Trp1346.C, Pro1592.C, Leu1593.C, Val1596.C                                                        |
|                                                       | -12.3          | Leu1373.A, Ala1377.A, Gly1380.A, Val1381.A, Ser1384.A, Phe1388.A, Ser1390.A, Lys1391.A, Leu1397.A                                             |
|                                                       | -12.4          | Trp1338.A, Val1341.A, Gly1342.A, Ile1345.A, Trp1346.A, Pro1592.A, Leu1593.A, Leu1595.A, Val1596.A                                             |
|                                                       | -12.7          | Leu1373.D, Ala1377.D, Gly1380.D, Val1381.D, Ser1384.D, Phe1388.D, Ser1390.D, Lys1391.D, Leu1397.D                                             |
|                                                       | -13.0          | Ile1312.B, Met1315.B, Ser1319.B, Thr1324.B, Phe1452.C, Met1456.C, Phe1486.C, His1492.C, Pro1493.C                                             |
|                                                       | -12.8          | Ile1312.A, Met1315.A, Ile1316.A, Ser1319.A, Thr1324.A, Phe1409.A, Phe1452.B, Met1456.B, Phe1486.B, Val1489.B, His1492.B, Pro1493.B            |
|                                                       | -12.6          | Leu1373.C, Leu1374.C, Ala1377.C, Val1381.C, Ser1384.C, Phe1388.C, Lys1391.C, Leu1397.C                                                        |
|                                                       | -12.3          | Trp1338.B, Val1341.B, Gly1342.B, Ile1345.B, Trp1346.B, Pro1592.B, Leu1593.B, Leu1595.B, Val1596.B                                             |
|                                                       | -12.5          | Leu1373.B, Leu1374.B, Ala1377.B, Val1381.B, Ser1384.B, Phe1388.B, Lys1391.B, Leu1397.B                                                        |
| 5vkq_IC                                               | -14.1          | Leu1275.C, Ile1279.C, Phe1304.C, Leu1308.C, Ile1312.C, Met1315.C, Ile1316.C, Ile1416.C, Phe1419.C, Leu1420.C, Phe1422.C, Phe1452.D            |
|                                                       | -14.0          | Phe1452.A, Leu1275.D, Phe1304.D, Leu1308.D, Ile1312.D, Met1315.D, Ile1416.D, Phe1419.D, Leu1420.D, Phe1422.D                                  |
|                                                       | -13.9          | Leu1533.A, Ile1536.A, Val1537.A, Ile1540.A, Gly1363.D, Leu1364.D, Ser1366.D, Ile1367.D, Leu1370.D, Leu1407.D, Leu1411.D, Val1414.D, Leu1437.D |
|                                                       | -13.6          | Gly1363.A, Leu1364.A, Ser1366.A, Ile1367.A, Leu1370.A, Leu1407.A, Leu1411.A, Val1414.A, Leu1437.A, Leu1533.B, Ile1536.B, Val1537.B, Ile1540.B |
|                                                       | -13.2          | Leu1437.A, Lys1438.A, Leu1440.A, Ala1441.A, Leu1444.A, Phe1497.A, Ile1536.B, Ile1540.B, Leu1543.B                                             |
|                                                       | -14.1          | Leu1275.A, Phe1304.A, Leu1308.A, Ile1312.A, Met1315.A, Ile1416.A, Phe1419.A, Leu1420.A, Phe1422.A, Phe1452.B                                  |
|                                                       | -14.7          | Ala1445.A, Ala1448.A, Ile1449.A, Phe1452.A, Ile1494.A, Phe1497.A, Leu1420.D, His1423.D, Leu1425.D, Phe1426.D                                  |
|                                                       | -13.6          | Leu1420.C, Leu1425.C, Ala1441.D, Ala1445.D, Ala1448.D, Phe1452.D, Ile1494.D, Phe1497.D                                                        |
|                                                       | -13.5          | Ile1536.A, Ile1540.A, Leu1543.A, Leu1437.D, Leu1440.D, Ala1441.D, Leu1444.D, Phe1497.D, Glu1498.D, Phe1501.D                                  |
|                                                       | -13.6          | Leu1437.C, Leu1440.C, Ala1441.C, Leu1444.C, Phe1497.C, Glu1498.C, Phe1501.C, Ile1536.D, Ile1540.D, Leu1543.D                                  |
|                                                       | -14.1          | Gly1363.C, Leu1364.C, Ser1366.C, Ile1367.C, Leu1370.C, Leu1407.C, Leu1411.C, Val1414.C, Leu1437.C, Ile1536.D, Val1537.D, Ile1540.D            |
|                                                       | -13.7          | Gly1363.B, Leu1364.B, Ser1366.B, Ile1367.B, Leu1370.B, Leu1407.B, Leu1411.B, Val1414.B, Leu1437.B, Leu1533.C, Ile1536.C, Val1537.C, Ile1540.C |
|                                                       | -13.2          | Leu1275.B, Ile1279.B, Phe1304.B, Leu1308.B, Ile1312.B, Met1315.B, Ile1316.B, Ser1319.B, Ile1416.B, Phe1419.B, Leu1420.B, Phe1422.B, Phe1452.C |
|                                                       | -13.0          | Leu1437.B, Leu1440.B, Ala1441.B, Leu1444.B, Phe1497.B, Glu1498.B, Phe1501.B, Lys1535.C, Ile1536.C, Gly1539.C, Ile1540.C, Leu1543.C            |
|                                                       | -14.2          | Leu1420.A, Leu1425.A, Ala1445.B, Ala1448.B, Ile1449.B, Phe1452.B, Ile1494.B, Phe1497.B                                                        |
|                                                       | -13.6          | Leu1420.B, His1423.B, Leu1425.B, Phe1426.B, Ala1441.C, Ala1445.C, Ala1448.C, Phe1452.C, Ile1494.C, Phe1497.C                                  |

| PDB <sup>a</sup>                                              | E <sup>b</sup> | Local Residues <sup>c</sup>                                                                                                                                                                                                          |
|---------------------------------------------------------------|----------------|--------------------------------------------------------------------------------------------------------------------------------------------------------------------------------------------------------------------------------------|
| TRPP                                                          |                |                                                                                                                                                                                                                                      |
| TRPP (PC2), closed, Human 5k47                                |                |                                                                                                                                                                                                                                      |
| 5k47_EC                                                       | -14.2          | Leu228.A, Ile232.A, Cys235.A, Tyr239.A, Ser244.A, Trp570.A, Gln613.B, Tyr616.B, Phe629.B                                                                                                                                             |
|                                                               | -14.1          | Leu228.B, Ile232.B, Cys235.B, Tyr239.B, Trp570.B, Gln613.C, Tyr616.C, Phe629.C                                                                                                                                                       |
|                                                               | -13.5          | Val513.C, Leu517.C, Ile556.C, Gln557.C, Asn560.C, Ile561.C, Val564.C, Val655.D                                                                                                                                                       |
|                                                               | -13.5          | Val513.B, Leu517.B, Gln557.B, Asn560.B, Ile561.B, Val564.B, Phe568.B, Val655.C, Leu656.C                                                                                                                                             |
|                                                               | -12.5          | Cys509.A, Val513.A, Leu517.A, Gln557.A, Asn560.A, Ile561.A, Val564.A, Phe568.A, Val655.B, Leu656.B                                                                                                                                   |
|                                                               | -12.8          | Val512.B, Val513.B, Val516.B, Leu517.B, Val520.B, Tyr553.B, Gln557.B, Ile561.B                                                                                                                                                       |
|                                                               | -12.8          | Ile492.C, Val516.C, Val519.C, Val520.C, Gly523.C, Ile524.C, Tyr527.C, Arg528.C                                                                                                                                                       |
|                                                               | -12.5          | Ile492.B, Val516.B, Val519.B, Val520.B, Gly523.B, Ile524.B, Tyr527.B, Arg528.B                                                                                                                                                       |
|                                                               | -14.1          | Gln613.A, Tyr616.A, Phe629.A, Leu228.D, Ile232.D, Cys235.D, Tyr239.D, Trp570.D                                                                                                                                                       |
|                                                               | -14.0          | Leu228.C, Ile232.C, Cys235.C, Tyr239.C, Trp570.C, Gln613.D, Tyr616.D, Phe629.D                                                                                                                                                       |
|                                                               | -13.5          | Val655.A, Leu656.A, Val513.D, Leu517.D, Gln557.D, Asn560.D, Ile561.D, Val564.D, Phe568.D                                                                                                                                             |
|                                                               | -12.6          | Ile492.A, Val516.A, Val519.A, Val520.A, Gly523.A, Ile524.A, Tyr527.A, Arg528.A                                                                                                                                                       |
|                                                               | -12.5          | Ile492.D, Val516.D, Val519.D, Val520.D, Gly523.D, Ile524.D, Tyr527.D, Arg528.D                                                                                                                                                       |
|                                                               | -13.1          | Val512.D, Val513.D, Val516.D, Leu517.D, Val520.D, Tyr553.D, Gln557.D, Ile561.D                                                                                                                                                       |
|                                                               | -13.0          | Val512.A, Val513.A, Val516.A, Leu517.A, Val520.A, Tyr553.A, Trp554.A, Ile561.A                                                                                                                                                       |
| 5k47_IC                                                       | -14.0          | Phe503.C, Arg504.C, Phe506.C, Cys509.C, Phe567.C, Phe568.C, Tyr611.D, Thr663.D                                                                                                                                                       |
|                                                               | -13.9          | Leu228.B, Trp570.B, Leu573.B, Phe576.B, Ile577.B, Asn578.B, Phe579.B, Ile602.C, Ile606.C, Leu609.C                                                                                                                                   |
|                                                               | -13.9          | Phe503.B, Arg504.B, Phe506.B, Cys509.B, Phe567.B, Phe568.B, Tyr611.C, Thr663.C                                                                                                                                                       |
|                                                               | -13.9          | Leu228.A, Trp570.A, Leu573.A, Phe576.A, Ile577.A, Asn578.A, Phe579.A, Ile602.B, Ile606.B, Leu609.B                                                                                                                                   |
|                                                               | -13.1          | Ile495.B, His498.B, Lys499.B, Leu500.B, Tyr502.B, Phe503.B, Val512.B, Val516.B, Val519.B                                                                                                                                             |
|                                                               | -13.1          | Ile495.C, Lys499.C, Leu500.C, Tyr502.C, Phe503.C, Val512.C, Val516.C, Val519.C                                                                                                                                                       |
|                                                               | -13.2          | Ile495.A, Lys499.A, Leu500.A, Tyr502.A, Phe503.A, Val512.A, Val516.A, Val519.A                                                                                                                                                       |
|                                                               | -13.2          | Arg504.A, Phe506.A, Cys509.A, Val564.A, Phe568.A, Ile659.B, Thr663.B, Phe667.B                                                                                                                                                       |
|                                                               | -13.9          | Tyr611.A, Thr663.A, Phe503.D, Arg504.D, Phe506.D, Cys509.D, Phe567.D, Phe568.D                                                                                                                                                       |
|                                                               | -13.9          | Leu228.C, Trp570.C, Leu573.C, Phe576.C, Ile577.C, Asn578.C, Phe579.C, Asn580.C, Ile602.D, Ile606.D, Leu609.D                                                                                                                         |
|                                                               | -13.9          | Ile602.A, Ile606.A, Leu609.A, Leu228.D, Trp570.D, Leu573.D, Phe576.D, Ile577.D, Phe579.D                                                                                                                                             |
|                                                               | -13.1          | Ile495.D, Lys499.D, Leu500.D, Tyr502.D, Phe503.D, Val512.D, Val516.D, Val519.D                                                                                                                                                       |
| TRPP (PC2), closed, with Ca, PA and palmitic acid, Human 5mke |                |                                                                                                                                                                                                                                      |
| 5mke_EC                                                       | -18.3          | Cys235.C, Thr238.C, Tyr239.C, Met242.C, Ser243.C, Ser244.C, Trp570.C, Leu609.D, Tyr616.D, Phe629.D                                                                                                                                   |
|                                                               | -18.0          | Cys235.B, Thr238.B, Tyr239.B, Met242.B, Ser243.B, Ser244.B, Trp570.B, Leu609.C, Tyr616.C, Phe629.C                                                                                                                                   |
|                                                               | -15.3          | Arg654.A, Val655.A, Pro658.A, Ile659.A, Thr662.A, Trp380.D, Phe605.D, Gln630.D, Ile633.D, Phe634.D                                                                                                                                   |
|                                                               | -15.0          | Trp380.A, Phe605.A, Gln630.A, Ile633.A, Phe634.A, Arg654.B, Val655.B, Pro658.B, Ile659.B, Thr662.B                                                                                                                                   |
|                                                               | -16.2          | Cys235.A, Thr238.A, Tyr239.A, Met242.A, Ser243.A, Trp570.A, Leu609.B, Gln613.B, Tyr616.B, Phe629.B                                                                                                                                   |
|                                                               | -15.9          | Gln613.A, Tyr616.A, Phe629.A, Cys235.D, Thr238.D, Tyr239.D, Met242.D, Ser243.D, Ser244.D, Trp570.D                                                                                                                                   |
|                                                               | -15.0          | Trp380.B, Phe605.B, Gln630.B, Ile633.B, Phe634.B, Arg654.C, Val655.C, Pro658.C, Ile659.C, Thr662.C                                                                                                                                   |
| 5mke_IC                                                       | -14.2          | Leu641.A, Gly642.A, Asp643.A, Phe669.A, Leu673.A, Leu677.A, Leu641.B, Gly642.B, Asp643.B, Phe669.B, Leu673.B, Leu677.B, Ile640.C, Leu641.C, Gly642.C, Asp643.C, Phe669.C, Leu673.C, Leu677.C, Leu641.D, Gly642.D, Asp643.D, Leu677.D |
|                                                               | -13.7          | Tyr611.A, Leu614.A, Val618.A, Leu656.A, Gly657.A, Ile659.A, Tyr660.A, Thr663.A, Phe667.A, Val564.D, Phe567.D, Phe568.D, Ser591.D                                                                                                     |
|                                                               | -13.5          | Leu510.B, Val564.B, Phe567.B, Phe568.B, Ser591.B, Tyr611.C, Val655.C, Leu656.C, Gly657.C, Ile659.C, Tyr660.C, Thr663.C, Phe667.C                                                                                                     |
|                                                               | -13.5          | Leu228.B, Leu231.B, Ile232.B, Tyr239.B, Trp570.B, Leu573.B, Phe576.B, Ile577.B, Ile606.C                                                                                                                                             |
|                                                               | -13.5          | Ile606.A, Leu228.D, Leu231.D, Ile232.D, Trp570.D, Leu573.D, Phe576.D, Ile577.D                                                                                                                                                       |
|                                                               | -13.6          | Leu228.C, Leu231.C, Trp570.C, Leu573.C, Phe576.C, Ile577.C, Ile606.D, Phe629.D                                                                                                                                                       |
|                                                               | -14.4          | Val564.A, Phe567.A, Phe568.A, Ser591.A, Tyr611.B, Leu614.B, Val618.B, Leu656.B, Gly657.B, Ile659.B, Tyr660.B, Thr663.B, Phe667.B                                                                                                     |

| PDB <sup>a</sup>                                              | E <sup>b</sup> | Local Residues <sup>c</sup>                                                                                            |
|---------------------------------------------------------------|----------------|------------------------------------------------------------------------------------------------------------------------|
|                                                               | -13.0          | Phe598.C, Gln630.C, Ile633.C, Phe634.C, Ile659.D, Thr662.D, Phe666.D, Phe667.D                                         |
|                                                               | -13.4          | Leu228.A, Leu231.A, Trp570.A, Leu573.A, Phe576.A, Ile577.A, Asn578.A, Ile606.B                                         |
| TRPP (PC2), closed, with Ca, PA and palmitic acid, Human 5mkf |                |                                                                                                                        |
| 5mkf_EC                                                       | -15.5          | Trp380.A, Gln630.A, Phe634.A, Arg654.B, Val655.B, Pro658.B, Ile659.B, Thr662.B, Thr663.B, Phe667.B                     |
|                                                               | -15.3          | Arg654.A, Val655.A, Pro658.A, Ile659.A, Thr662.A, Trp380.D, Gln630.D, Ile633.D, Phe634.D                               |
|                                                               | -15.3          | Phe605.A, Leu609.A, Gln613.A, Tyr616.A, Phe629.A, Thr238.D, Tyr239.D, Met242.D, Ser244.D                               |
|                                                               | -15.2          | Thr238.C, Tyr239.C, Ser244.C, Phe605.D, Leu609.D, Gln613.D, Tyr616.D, Phe629.D                                         |
|                                                               | -14.0          | Leu510.A, Val513.A, Leu517.A, Gln557.A, Asn560.A, Ile561.A, Val564.A, Phe568.A, Val655.B, Leu656.B                     |
|                                                               | -13.9          | Val655.A, Leu656.A, Leu510.D, Val513.D, Leu517.D, Tyr553.D, Gln557.D, Asn560.D, Ile561.D, Val564.D, Phe568.D           |
|                                                               | -14.0          | Val512.A, Val513.A, Val516.A, Leu517.A, Val520.A, Tyr553.A, Trp554.A, Gln557.A, Ile561.A                               |
|                                                               | -13.9          | Val512.D, Val513.D, Val516.D, Leu517.D, Val520.D, Tyr553.D, Trp554.D, Gln557.D, Ile561.D                               |
|                                                               | -15.4          | Trp380.C, Gln630.C, Ile633.C, Phe634.C, Arg654.D, Val655.D, Pro658.D, Ile659.D, Thr662.D                               |
|                                                               | -15.3          | Thr238.A, Tyr239.A, Ser244.A, Phe605.B, Leu609.B, Gln613.B, Tyr616.B, Phe629.B                                         |
|                                                               | -15.3          | Trp380.B, Gln630.B, Ile633.B, Phe634.B, Arg654.C, Val655.C, Pro658.C, Ile659.C, Thr662.C, Thr663.C, Phe666.C           |
|                                                               | -15.2          | Thr238.B, Tyr239.B, Met242.B, Ser244.B, Phe605.C, Leu609.C, Gln613.C, Tyr616.C, Phe629.C                               |
|                                                               | -14.1          | Leu510.C, Val513.C, Leu517.C, Gln557.C, Asn560.C, Ile561.C, Val564.C, Phe568.C, Val655.D, Leu656.D                     |
|                                                               | -14.0          | Leu510.B, Val513.B, Leu517.B, Gln557.B, Asn560.B, Ile561.B, Val564.B, Phe568.B, Val655.C, Leu656.C                     |
|                                                               | -13.9          | Val512.B, Val513.B, Val516.B, Leu517.B, Val520.B, Tyr553.B, Trp554.B, Gln557.B, Ile561.B                               |
|                                                               | -13.9          | Val512.C, Val513.C, Val516.C, Leu517.C, Val520.C, Tyr553.C, Trp554.C, Gln557.C, Ile561.C                               |
| 5mkf_IC                                                       | -14.2          | Ile602.A, Ile606.A, Gln613.A, Leu231.D, Cys235.D, Trp570.D, Leu573.D, Ile577.D, Asn578.D, Phe579.D, Asn580.D           |
|                                                               | -14.2          | Leu231.C, Cys235.C, Trp570.C, Leu573.C, Ile577.C, Asn578.C, Asn580.C, Ile602.D, Ile606.D, Gln613.D                     |
|                                                               | -13.7          | Tyr611.A, Leu614.A, Leu656.A, Ile659.A, Tyr660.A, Phe667.A, Phe506.D, Leu510.D, Val564.D, Phe567.D, Phe568.D, Phe598.D |
|                                                               | -13.7          | Phe506.C, Leu510.C, Val564.C, Phe567.C, Phe568.C, Phe598.C, Tyr611.D, Leu614.D, Leu656.D, Ile659.D, Phe667.D           |
|                                                               | -13.7          | Phe506.A, Leu510.A, Val564.A, Phe567.A, Phe568.A, Phe598.A, Tyr611.B, Leu614.B, Leu656.B, Ile659.B, Phe667.B           |
|                                                               | -13.1          | Thr662.A, Phe598.D, Gly599.D, Ala601.D, Ile602.D, Phe605.D, Ile633.D, Phe634.D                                         |
|                                                               | -13.0          | Phe598.A, Gly599.A, Ala601.A, Ile602.A, Phe605.A, Ile633.A, Phe634.A, Thr662.B, Arg581.D                               |
|                                                               | -14.4          | Leu231.B, Cys235.B, Trp570.B, Leu573.B, Ile577.B, Asn578.B, Phe579.B, Asn580.B, Ile602.C, Ile606.C, Gln613.C           |
|                                                               | -14.3          | Leu231.A, Cys235.A, Trp570.A, Leu573.A, Ile577.A, Asn578.A, Phe579.A, Asn580.A, Ile602.B, Ile606.B, Gln613.B           |
|                                                               | -13.7          | Phe506.B, Leu510.B, Val564.B, Phe567.B, Phe568.B, Phe598.B, Leu614.C, Leu656.C, Ile659.C, Tyr660.C, Phe667.C           |
|                                                               | -13.1          | Arg581.B, Phe598.C, Gly599.C, Ala601.C, Ile602.C, Phe605.C, Ile633.C, Phe634.C, Thr662.D                               |
|                                                               | -13.2          | Asn580.A, Phe598.B, Gly599.B, Ala601.B, Ile602.B, Phe605.B, Phe634.B, Thr662.C                                         |
| TRPP (PKD2), closed, Human 5t4d                               |                |                                                                                                                        |
| 5t4d_EC                                                       | -16.4          | Val655.C, Leu656.C, Ile659.C, Cys509.D, Val513.D, Leu517.D, Gln557.D, Asn560.D, Ile561.D, Val564.D, Phe568.D           |
|                                                               | -16.4          | Val655.B, Leu656.B, Ile659.B, Cys509.C, Val513.C, Leu517.C, Ile556.C, Gln557.C, Asn560.C, Ile561.C, Val564.C, Phe568.C |
|                                                               | -15.0          | Arg654.B, Val655.B, Pro658.B, Ile659.B, Thr662.B, Trp380.C, Ile602.C, Phe605.C, Gln630.C, Ile633.C, Phe634.C           |
|                                                               | -15.0          | Arg654.C, Val655.C, Pro658.C, Ile659.C, Thr662.C, Trp380.D, Ile602.D, Phe605.D, Gln630.D, Ile633.D, Phe634.D           |
|                                                               | -13.4          | Val512.C, Val513.C, Val516.C, Leu517.C, Val520.C, Tyr553.C, Gln557.C, Ile561.C                                         |
|                                                               | -13.3          | Val512.D, Val513.D, Val516.D, Leu517.D, Val520.D, Tyr553.D, Gln557.D, Ile561.D                                         |
|                                                               | -16.4          | Val655.A, Leu656.A, Ile659.A, Cys509.B, Val513.B, Leu517.B, Gln557.B, Asn560.B, Ile561.B, Val564.B, Phe568.B           |
|                                                               | -16.4          | Cys509.A, Val513.A, Leu517.A, Gln557.A, Asn560.A, Ile561.A, Val564.A, Phe568.A, Val655.D, Leu656.D, Ile659.D           |

| PDB <sup>a</sup>                       | E <sup>b</sup> | Local Residues <sup>c</sup>                                                                                                      |
|----------------------------------------|----------------|----------------------------------------------------------------------------------------------------------------------------------|
|                                        | -15.0          | Trp380.A, Ile602.A, Phe605.A, Gln630.A, Ile633.A, Phe634.A, Arg654.D, Val655.D, Pro658.D, Ile659.D, Thr662.D                     |
|                                        | -15.0          | Arg654.A, Val655.A, Pro658.A, Ile659.A, Thr662.A, Trp380.B, Ile602.B, Phe605.B, Gln630.B, Ile633.B, Phe634.B                     |
|                                        | -13.3          | Val512.A, Val513.A, Val516.A, Leu517.A, Val520.A, Tyr553.A, Gln557.A, Ile561.A                                                   |
|                                        | -13.3          | Val512.B, Val513.B, Val516.B, Leu517.B, Val520.B, Tyr553.B, Gln557.B, Ile561.B                                                   |
| 5t4d_IC                                | -16.6          | Phe506.A, Trp507.A, Phe567.A, Phe568.A, Ile571.A, Ser587.A, Thr588.A, Met590.A, Ser591.A, Ile607.D, Tyr611.D, Thr663.D, Phe667.D |
|                                        | -16.6          | Ile607.B, Tyr611.B, Thr663.B, Phe667.B, Phe506.C, Trp507.C, Phe567.C, Phe568.C, Ile571.C, Ser587.C, Met590.C, Ser591.C           |
|                                        | -16.6          | Ile607.C, Tyr611.C, Thr663.C, Phe667.C, Phe506.D, Trp507.D, Phe567.D, Phe568.D, Ile571.D, Ser587.D, Thr588.D, Met590.D, Ser591.D |
|                                        | -13.0          | Thr662.B, Thr663.B, Phe666.B, Phe667.B, Arg504.C, Phe506.C, Ala594.C, Phe598.C, Phe605.C                                         |
|                                        | -13.0          | Thr662.C, Thr663.C, Phe666.C, Phe667.C, Phe506.D, Ala594.D, Phe598.D, Phe605.D                                                   |
|                                        | -12.5          | Leu609.C, Leu221.D, Leu224.D, Leu228.D, Trp570.D, Leu573.D, Phe576.D, Phe579.D                                                   |
|                                        | -12.5          | Leu221.A, Leu224.A, Leu228.A, Trp570.A, Leu573.A, Phe576.A, Phe579.A, Ile606.D, Leu609.D                                         |
|                                        | -12.5          | Leu609.B, Leu221.C, Leu224.C, Leu228.C, Trp570.C, Leu573.C, Phe576.C, Phe579.C                                                   |
|                                        | -16.6          | Ile607.A, Tyr611.A, Thr663.A, Phe667.A, Phe506.B, Trp507.B, Phe567.B, Phe568.B, Ile571.B, Ser587.B, Met590.B, Ser591.B           |
|                                        | -13.0          | Thr662.A, Thr663.A, Phe666.A, Phe667.A, Arg504.B, Phe506.B, Ala594.B, Phe598.B, Phe605.B                                         |
|                                        | -12.9          | Phe506.A, Ala594.A, Phe598.A, Phe605.A, Thr662.D, Thr663.D, Phe666.D, Phe667.D                                                   |
|                                        | -12.5          | Leu609.A, Leu221.B, Leu224.B, Leu228.B, Trp570.B, Leu573.B, Phe576.B, Phe579.B                                                   |
| TRPP (3PKD2/1PKD1), closed, Human 6a70 |                |                                                                                                                                  |
| 6a70_EC                                | -13.7          | Leu4031.B, His4081.B, Leu4085.B, Arg654.G, Val655.G, Pro658.G, Ile659.G, Thr662.G                                                |
|                                        | -13.7          | Phe634.A, Phe637.A, Ile640.A, Leu641.A, Leu673.A, Phe676.A, Leu677.A, Leu4095.B, Gly4097.B                                       |
|                                        | -13.3          | Leu228.A, Ile232.A, Cys235.A, Tyr239.A, Trp570.A, Leu573.A, Ile577.A, Val4038.B, Gln4042.B, Ile4045.B, Pro4084.B                 |
|                                        | -13.3          | Phe485.A, Val488.A, Val489.A, Ile492.A, Leu493.A, Ile522.A, Gly523.A, Asn525.A, Ile526.A                                         |
|                                        | -12.9          | Leu3318.B, Leu3590.B, Leu3597.B, Gly3896.B, Leu3897.B, Leu3901.B, Leu3902.B, Val3905.B, Cys3906.B, Leu3909.B                     |
|                                        | -12.9          | Glu491.F, Val516.F, Val519.F, Val520.F, Gly523.F, Ile524.F, Tyr527.F, Arg528.F                                                   |
|                                        | -14.4          | Arg654.A, Val655.A, Pro658.A, Ile659.A, Thr662.A, Thr663.A, Phe666.A, Phe598.F, Phe605.F, Gln630.F, Phe634.F                     |
|                                        | -14.1          | Leu656.A, Phe506.F, Cys509.F, Val513.F, Leu517.F, Gln557.F, Asn560.F, Ile561.F, Val564.F, Phe568.F                               |
|                                        | -13.9          | Arg654.F, Val655.F, Pro658.F, Ile659.F, Thr662.F, Thr663.F, Phe666.F, Phe598.G, Ala601.G, Phe605.G, Gln630.G, Phe634.G           |
|                                        | -13.5          | Ile602.F, Ile606.F, Leu609.F, Phe629.F, Gln630.F, Ile633.F, Trp570.G, Leu573.G                                                   |
|                                        | -13.6          | Val655.F, Leu656.F, Ile659.F, Phe506.G, Val513.G, Leu517.G, Gln557.G, Asn560.G, Ile561.G, Val564.G, Phe568.G                     |
| 6a70_IC                                | -16.0          | Ile495.A, His498.A, His501.A, Tyr502.A, Phe503.A, Arg504.A, Val513.A, Val516.A                                                   |
|                                        | -15.7          | Trp3263.B, Leu3264.B, Ser3265.B, Ile3266.B, Cys3284.B, Ile3288.B, Leu3589.B, Phe3596.B, Phe3600.B, Leu3675.B, Leu3679.B          |
|                                        | -14.1          | Trp570.A, Ile577.A, Phe579.A, Asn580.A, Met583.A, Leu4031.B, Val4034.B, Val4035.B, Val4038.B                                     |
|                                        | -13.6          | Met3089.B, Leu3999.B, Ala4002.B, Gln4005.B, Leu4006.B, Phe4008.B, Val4009.B, Ile606.G, Gln613.G                                  |
|                                        | -13.3          | Arg222.A, Glu223.A, Thr226.A, Phe230.A, Phe482.A, Phe483.A, Tyr486.A, Glu490.A                                                   |
|                                        | -16.3          | Ile659.F, Thr663.F, Phe667.F, Phe506.G, Trp507.G, Phe567.G, Phe568.G, Ile571.G, Phe574.G, Ser587.G, Met590.G, Ser591.G           |
|                                        | -13.7          | Phe506.G, Val513.G, Leu517.G, Val564.G, Phe568.G, Ala594.G, Lys595.G, Phe598.G                                                   |
|                                        | -13.6          | Glu491.G, Ile495.G, His501.G, Phe503.G, Arg504.G, Val512.G, Val516.G, Val519.G                                                   |
|                                        | -13.6          | Thr662.F, Thr663.F, Phe666.F, Phe667.F, Ala594.G, Phe598.G, Phe605.G, Phe637.G                                                   |
|                                        | -13.6          | Thr662.A, Thr663.A, Phe666.A, Phe667.A, Phe506.F, Ala594.F, Phe598.F, Phe605.F                                                   |
|                                        | -14.7          | Phe598.F, Ile602.F, Ile606.F, Leu609.F, Phe629.F, Trp570.G, Leu573.G, Ile577.G, Phe579.G, Asn580.G                               |
|                                        | -14.5          | Ile659.A, Thr663.A, Phe667.A, Phe506.F, Phe568.F, Ile571.F, Phe574.F, Ser587.F, Met590.F, Ser591.F, Ala594.F                     |
|                                        | -14.2          | Ile602.A, Ile606.A, Leu609.A, Trp570.F, Leu573.F, Ile577.F, Phe579.F, Asn580.F                                                   |

| PDB <sup>a</sup>                  | E <sup>b</sup>                                                                                                                   | Local Residues <sup>c</sup>                                                                                                      |
|-----------------------------------|----------------------------------------------------------------------------------------------------------------------------------|----------------------------------------------------------------------------------------------------------------------------------|
| TRPP (PKD2L1), closed, Human 6d1w |                                                                                                                                  |                                                                                                                                  |
| 6d1w_EC                           | -14.2                                                                                                                            | Arg654.A, Val655.A, Pro658.A, Ile659.A, Thr662.A, Trp380.D, Phe605.D, Gln630.D, Ile633.D, Phe634.D                               |
|                                   | -14.2                                                                                                                            | Trp380.B, Phe605.B, Gln630.B, Ile633.B, Phe634.B, Arg654.D, Val655.D, Pro658.D, Ile659.D, Thr662.D                               |
|                                   | -14.3                                                                                                                            | Arg654.B, Val655.B, Pro658.B, Ile659.B, Thr662.B, Trp380.C, Phe605.C, Gln630.C, Ile633.C, Phe634.C                               |
|                                   | -14.2                                                                                                                            | Trp380.A, Phe605.A, Gln630.A, Ile633.A, Phe634.A, Arg654.C, Val655.C, Pro658.C, Ile659.C, Thr662.C                               |
| 6d1w_IC                           | -14.6                                                                                                                            | Ile659.B, Thr662.B, Thr663.B, Phe666.B, Phe667.B, Ala594.C, Lys595.C, Phe598.C, Phe605.C, Ile633.C, Phe634.C                     |
|                                   | -14.6                                                                                                                            | Ile659.A, Thr662.A, Thr663.A, Phe666.A, Phe667.A, Ala594.D, Lys595.D, Leu597.D, Phe598.D, Phe605.D, Ile633.D, Phe634.D           |
|                                   | -14.3                                                                                                                            | Val488.D, Glu491.D, Ile492.D, Leu493.D, Val512.D, Val516.D, Val519.D, Val520.D                                                   |
|                                   | -14.0                                                                                                                            | Val564.B, Phe568.B, Ala594.B, Lys595.B, Leu597.B, Phe598.B, Ile659.D, Thr663.D, Phe667.D, Phe670.D                               |
|                                   | -14.0                                                                                                                            | Val488.B, Glu491.B, Ile492.B, Leu493.B, Val512.B, Val516.B, Val519.B, Val520.B                                                   |
|                                   | -14.3                                                                                                                            | Val488.C, Glu491.C, Ile492.C, Leu493.C, Val512.C, Val516.C, Val519.C, Val520.C                                                   |
|                                   | -14.2                                                                                                                            | Val488.A, Glu491.A, Ile492.A, Leu493.A, Val512.A, Val516.A, Val519.A, Val520.A                                                   |
|                                   | -14.0                                                                                                                            | Val564.A, Phe568.A, Ala594.A, Lys595.A, Leu597.A, Phe598.A, Ile659.C, Thr663.C, Phe667.C, Phe670.C                               |
| TRPP (PKD2L1), closed, Human 6du8 |                                                                                                                                  |                                                                                                                                  |
| 6du8_EC                           | -16.6                                                                                                                            | Ile108.C, Leu111.C, Val112.C, Tyr119.C, Thr122.C, Ser124.C, Trp450.C, Tyr496.D, Phe509.D                                         |
|                                   | -16.6                                                                                                                            | Ile108.A, Leu111.A, Val112.A, Tyr119.A, Thr122.A, Ser124.A, Trp450.A, Tyr496.C, Phe509.C                                         |
|                                   | -13.6                                                                                                                            | Ile388.C, Leu391.C, Val392.C, Leu395.C, Leu396.C, Phe433.C, Gln437.C, Met441.C, Ile535.D, Leu536.D                               |
|                                   | -13.6                                                                                                                            | Ile535.B, Leu536.B, Ile388.D, Leu391.D, Val392.D, Leu395.D, Leu396.D, Gln437.D, Met441.D                                         |
|                                   | -13.2                                                                                                                            | Leu521.A, Gly522.A, Asp523.A, Leu521.B, Gly522.B, Asp523.B, Leu521.C, Gly522.C, Asp523.C, Leu521.D, Gly522.D                     |
|                                   | -13.6                                                                                                                            | Ile388.A, Leu391.A, Val392.A, Leu395.A, Leu396.A, Phe433.A, Gln437.A, Met441.A, Ile535.C, Leu536.C                               |
|                                   | -12.6                                                                                                                            | Arg534.B, Ile535.B, Pro538.B, Ala539.B, Phe485.D, Phe489.D, Ile510.D, Phe514.D                                                   |
|                                   | -12.4                                                                                                                            | Phe485.C, Ile510.C, Phe514.C, Arg534.D, Ile535.D, Pro538.D, Ala539.D, Val542.D                                                   |
|                                   | -16.6                                                                                                                            | Tyr496.A, Phe509.A, Ile108.B, Leu111.B, Val112.B, Tyr119.B, Ser124.B, Trp450.B                                                   |
|                                   | -16.6                                                                                                                            | Tyr496.B, Phe509.B, Ile108.D, Leu111.D, Val112.D, Tyr119.D, Ser124.D, Trp450.D                                                   |
|                                   | -13.6                                                                                                                            | Ile535.A, Leu536.A, Ile388.B, Leu391.B, Val392.B, Leu395.B, Leu396.B, Phe433.B, Gln437.B, Met441.B                               |
|                                   | -12.4                                                                                                                            | Arg534.A, Ile535.A, Pro538.A, Ala539.A, Val542.A, Phe485.B, Ile510.B, Phe514.B                                                   |
| -12.4                             | Phe485.A, Ile510.A, Phe514.A, Arg534.C, Ile535.C, Pro538.C, Ala539.C, Val542.C                                                   |                                                                                                                                  |
| 6du8_IC                           | -13.9                                                                                                                            | Ala481.C, Phe484.C, Phe485.C, Ile513.C, Phe514.C, Phe517.C, Met555.C, Ile559.C, Val542.D, Phe546.D, Phe549.D, Leu553.D           |
|                                   | -13.8                                                                                                                            | Val542.B, Phe546.B, Phe549.B, Ala481.D, Phe484.D, Phe485.D, Ile513.D, Phe514.D, Phe517.D, Met555.D, Ile559.D                     |
|                                   | -13.0                                                                                                                            | Phe556.A, Ile519.B, Ile520.B, Leu521.B, Gly522.B, Phe524.B, Phe549.B, Leu552.B, Leu553.B, Phe556.B, Leu521.D, Phe556.D           |
|                                   | -12.9                                                                                                                            | Val444.C, Phe447.C, Phe448.C, Ile451.C, Met483.D, Val487.D, Tyr491.D, Leu494.D, Leu536.D, Ala539.D, Thr543.D, Phe547.D, Phe550.D |
|                                   | -12.7                                                                                                                            | Ile385.A, Trp386.A, Phe447.A, Phe448.A, Ile451.A, Tyr491.C, Leu536.C, Ala539.C, Tyr540.C, Thr543.C                               |
|                                   | -13.5                                                                                                                            | Ile519.A, Ile520.A, Leu521.A, Gly522.A, Val545.A, Phe549.A, Leu552.A, Phe556.A, Leu521.B, Phe549.C, Leu553.C, Phe556.C           |
|                                   | -13.9                                                                                                                            | Val542.A, Phe546.A, Phe549.A, Ala481.B, Phe484.B, Phe485.B, Ile513.B, Phe514.B, Phe517.B, Met555.B, Ile559.B                     |
|                                   | -13.8                                                                                                                            | Ala481.A, Phe484.A, Phe485.A, Ile513.A, Phe514.A, Phe517.A, Met555.A, Ile559.A, Val542.C, Phe546.C, Phe549.C                     |
|                                   | -12.9                                                                                                                            | Ile519.A, Ile520.A, Leu521.A, Gly522.A, Phe524.A, Phe549.A, Leu552.A, Leu553.A, Phe556.A, Leu521.B, Phe556.B                     |
|                                   | -12.9                                                                                                                            | Met483.A, Val487.A, Tyr491.A, Leu494.A, Leu536.A, Ala539.A, Thr543.A, Phe547.A, Phe550.A, Val444.B, Phe447.B, Phe448.B, Ile451.B |
| -13.4                             | Leu521.A, Ile519.C, Ile520.C, Leu521.C, Gly522.C, Val545.C, Phe549.C, Leu552.C, Leu553.C, Phe556.C, Phe549.D, Leu553.D, Phe556.D |                                                                                                                                  |
| -12.9                             | Met483.B, Val487.B, Tyr491.B, Leu494.B, Leu536.B, Ala539.B, Thr543.B, Phe547.B, Phe550.B, Val444.D, Phe447.D, Phe448.D, Ile451.D |                                                                                                                                  |

| PDB <sup>a</sup>                                        | E <sup>b</sup> | Local Residues <sup>c</sup>                                                                                   |
|---------------------------------------------------------|----------------|---------------------------------------------------------------------------------------------------------------|
| TRPV1                                                   |                |                                                                                                               |
| TRPV1, closed, Rat 3j5p                                 |                |                                                                                                               |
| 3j5p_EC                                                 | -14.0          | Phe517.B, Val518.B, Leu521.B, Phe522.B, Val525.B, Leu529.B, Arg534.B, Glu536.B                                |
|                                                         | -14.0          | Phe517.D, Val518.D, Leu521.D, Phe522.D, Val525.D, Leu529.D, Arg534.D, Glu536.D                                |
|                                                         | -14.0          | Phe517.A, Val518.A, Leu521.A, Phe522.A, Val525.A, Leu529.A, Arg534.A, Glu536.A                                |
|                                                         | -14.0          | Phe517.C, Val518.C, Leu521.C, Phe522.C, Val525.C, Leu529.C, Arg534.C, Glu536.C                                |
| 3j5p_IC                                                 | -13.4          | Phe496.D, Val508.D, Ile514.D, Phe517.D, Val518.D, Leu521.D, Phe522.D, Val525.D                                |
|                                                         | -13.4          | Phe496.B, Val508.B, Ile514.B, Phe517.B, Val518.B, Leu521.B, Phe522.B, Val525.B                                |
|                                                         | -13.4          | Phe496.C, Val508.C, Ile514.C, Phe517.C, Val518.C, Leu521.C, Phe522.C, Val525.C                                |
|                                                         | -13.2          | Phe496.A, Val508.A, Ile514.A, Phe517.A, Val518.A, Leu521.A, Phe522.A, Val525.A                                |
| TRPV1, open, with DkTx and RTX, Rat 3j5q                |                |                                                                                                               |
| 3j5q_EC                                                 | -13.6          | Val658.D, Phe517.G, Leu521.G, Phe522.G, Val525.G, Leu529.G, Glu536.G, Ala539.G, Ser540.G, Phe54               |
|                                                         | -13.5          | Phe517.E, Leu521.E, Phe522.E, Val525.E, Leu529.E, Glu536.E, Ala539.E, Ser540.E, Phe543.E,                     |
|                                                         | -13.5          | Phe517.B, Leu521.B, Phe522.B, Val525.B, Leu529.B, Glu536.B, Ala539.B, Ser540.B, Phe543.B,                     |
|                                                         | -13.6          | Val658.B, Phe517.D, Leu521.D, Phe522.D, Val525.D, Leu529.D, Glu536.D, Ala539.D, Ser540.D, Phe54               |
| 3j5q_IC                                                 | -14.0          | Val508.B, Tyr511.B, Ile514.B, Leu515.B, Val518.B, Phe543.B, Met547.B, Leu574.B, Ala665.E                      |
|                                                         | -13.7          | Val508.E, Tyr511.E, Ile514.E, Leu515.E, Val518.E, Phe543.E, Met547.E, Leu574.E, Leu662.G, Ala665.G            |
|                                                         | -13.6          | Gly643.B, Tyr671.B, Asn676.B, Ile679.B, Ala680.B, Tyr671.D, Ile679.D, Ala680.D, Gly643.E, Tyr671.E, Ile679.E, |
|                                                         |                | Gly643.G, Tyr671.G, Ile679.G                                                                                  |
|                                                         | -13.1          | Phe438.B, Ile446.B, Met552.B, Thr556.B, Phe559.B, Met562.B, Phe582.E, Val586.E, Phe589.E                      |
|                                                         | -13.1          | Phe582.B, Val586.B, Phe589.B, Phe438.D, Ile446.D, Met552.D, Thr556.D, Phe559.D, Met562.D                      |
|                                                         | -12.8          | Phe438.E, Ile446.E, Met552.E, Thr556.E, Phe559.E, Met562.E, Phe582.G, Phe589.G                                |
|                                                         | -13.7          | Ala665.D, Val508.G, Tyr511.G, Ile514.G, Leu515.G, Val518.G, Phe543.G, Met547.G, Leu574.G                      |
|                                                         | -13.2          | Leu662.B, Ala665.B, Val508.D, Tyr511.D, Ile514.D, Leu515.D, Met547.D, Ile573.D, Leu574.D                      |
|                                                         | -13.0          | Phe582.D, Phe589.D, Phe438.G, Ile446.G, Met552.G, Thr556.G, Phe559.G, Met562.G                                |
| TRPV1, activated intermediate, with capsaicin, Rat 3j5r |                |                                                                                                               |
| 3j5r_EC                                                 | -15.2          | Val518.C, Leu521.C, Phe522.C, Val525.C, Leu529.C, Arg534.C, Glu536.C, Ser540.C                                |
|                                                         | -14.9          | Val518.A, Phe522.A, Val525.A, Leu529.A, Arg534.A, Glu536.A, Ser540.A, Phe543.A                                |
|                                                         | -14.9          | Val518.B, Leu521.B, Phe522.B, Val525.B, Leu529.B, Arg534.B, Glu536.B, Ser540.B                                |
|                                                         | -14.8          | Val518.D, Leu521.D, Phe522.D, Val525.D, Leu529.D, Arg534.D, Glu536.D, Ser540.D                                |
| 3j5r_IC                                                 |                | [none]                                                                                                        |
| TRPV1, closed, Rat 3j9j                                 |                |                                                                                                               |
| 3j9j_EC                                                 | -13.7          | Phe209.A, Phe58.B, Cys62.B, Ile66.B, Tyr73.B, Tyr74.B, Trp169.B, Met172.B                                     |
|                                                         | -13.6          | Val106.C, Phe109.C, Phe110.C, Leu144.C, Val147.C, Val148.C, Phe151.C, Ser152.C                                |
|                                                         | -13.5          | Val106.A, Phe109.A, Phe110.A, Leu144.A, Val147.A, Val148.A, Phe151.A, Ser152.A                                |
|                                                         | -13.5          | Phe109.A, Ile113.A, Phe137.A, Leu141.A, Val145.A, Val148.A, Leu149.A, Arg154.A                                |
|                                                         | -13.2          | Phe59.B, Leu63.B, Ile66.B, Ile67.B, Ala70.B, Tyr74.B, Phe93.B, Leu100.B                                       |
|                                                         | -13.8          | Leu141.A, Phe142.A, Val145.A, Glu156.A, Ala159.A, Ser160.A, Phe252.C, Val255.C                                |
|                                                         | -13.5          | Phe109.C, Ile113.C, Phe137.C, Leu141.C, Val145.C, Val148.C, Leu149.C, Arg154.C                                |
|                                                         | -13.8          | Leu141.C, Phe142.C, Val145.C, Glu156.C, Ala159.C, Ser160.C, Phe252.D, Val255.D                                |
|                                                         | -13.8          | Phe58.C, Cys62.C, Ile66.C, Tyr73.C, Tyr74.C, Trp169.C, Met172.C, Phe209.D                                     |
|                                                         | -12.9          | Ile66.A, Tyr73.A, Tyr74.A, Trp169.A, Met172.A, Leu205.C, Val206.C, Phe209.C, Leu227.C                         |
|                                                         | -13.1          | Phe59.C, Leu63.C, Ile66.C, Ile67.C, Ala70.C, Tyr74.C, Phe93.C, Leu100.C                                       |
|                                                         | -13.1          | Phe59.D, Leu63.D, Ile66.D, Ile67.D, Ala70.D, Tyr74.D, Phe93.D, Arg94.D, Leu100.D                              |
|                                                         | -13.6          | Val106.B, Phe109.B, Phe110.B, Leu144.B, Val147.B, Val148.B, Phe151.B, Ser152.B                                |



| PDB <sup>a</sup>                           | E <sup>b</sup> | Local Residues <sup>c</sup>                                                                                                                |
|--------------------------------------------|----------------|--------------------------------------------------------------------------------------------------------------------------------------------|
|                                            | -13.6          | Val106.D, Phe109.D, Phe110.D, Leu144.D, Val147.D, Val148.D, Phe151.D, Ser152.D                                                             |
|                                            | -13.6          | Phe109.B, Ile113.B, Phe137.B, Leu141.B, Val145.B, Val148.B, Leu149.B, Arg154.B                                                             |
|                                            | -13.4          | Phe109.D, Ile113.D, Phe137.D, Leu141.D, Val145.D, Val148.D, Leu149.D, Arg154.D                                                             |
|                                            | -13.9          | Phe252.B, Val255.B, Val138.D, Leu141.D, Phe142.D, Val145.D, Leu149.D, Glu156.D, Ala159.D, Ser160.D, Phe163.D                               |
|                                            | -13.8          | Phe252.A, Val255.A, Leu141.B, Phe142.B, Val145.B, Glu156.B, Ala159.B, Ser160.B                                                             |
|                                            | -12.7          | Phe209.B, Leu227.B, Phe59.D, Cys62.D, Ile66.D, Thr69.D, Tyr73.D, Tyr74.D                                                                   |
| 3j9j_IC                                    | -15.0          | Phe109.A, Ile113.A, Phe116.A, Leu117.A, Arg120.A, Pro121.A, Ser122.A, Phe137.A                                                             |
|                                            | -14.2          | Phe109.C, Ile113.C, Phe116.C, Leu117.C, Arg120.C, Pro121.C, Phe137.C, Leu141.C, Leu144.C, Val145.C, Val148.C                               |
|                                            | -13.7          | Ile53.C, Phe56.C, Asn57.C, Val60.C, Ile99.C, Leu100.C, Ser103.C, Tyr107.C                                                                  |
|                                            | -13.6          | Ile53.B, Phe56.B, Asn57.B, Val60.B, Ile99.B, Leu100.B, Ser103.B, Tyr107.B, Phe309.B                                                        |
|                                            | -13.6          | Ile53.A, Phe56.A, Asn57.A, Val60.A, Ile99.A, Leu100.A, Ser103.A, Tyr107.A                                                                  |
|                                            | -14.2          | Phe109.B, Ile113.B, Phe116.B, Leu117.B, Arg120.B, Pro121.B, Phe137.B, Leu141.B, Leu144.B, Val145.B, Val148.B                               |
|                                            | -14.2          | Phe109.D, Ile113.D, Phe116.D, Leu117.D, Arg120.D, Pro121.D, Phe137.D, Leu141.D, Leu144.D, Val145.D, Val148.D                               |
|                                            | -13.6          | Ile53.D, Phe56.D, Asn57.D, Val60.D, Ile99.D, Leu100.D, Ser103.D, Tyr107.D                                                                  |
| TRPV1, open, with DkTx and RTX, Rat 5irx   |                |                                                                                                                                            |
| 5irx_EC                                    | -15.0          | Gly643.A, Met644.A, Gly645.A, Tyr671.A, Gly643.B, Met644.B, Asp646.B, Gly643.C, Met644.C, Tyr671.C, Ile679.C, Gly643.D, Met644.D, Tyr671.D |
|                                            | -14.2          | Phe582.B, Leu585.B, Val586.B, Phe589.B, Leu630.B, Tyr631.B, Glu26.F, Phe27.F, Ile28.F                                                      |
|                                            | -14.5          | Ile446.A, Ala450.A, Tyr453.A, Tyr454.A, Trp549.A, Met552.A, Phe589.B, Leu630.B                                                             |
|                                            | -13.3          | Phe582.A, Phe589.A, Leu630.A, Ile446.C, Tyr453.C, Tyr454.C, Trp549.C, Met552.C                                                             |
|                                            | -14.9          | Phe582.C, Leu585.C, Val586.C, Phe589.C, Leu630.C, Tyr631.C, Met552.D, Glu26.E, Phe27.E                                                     |
|                                            | -14.5          | Phe589.C, Leu630.C, Ile446.D, Ala450.D, Tyr453.D, Tyr454.D, Trp549.D, Met552.D                                                             |
|                                            | -13.4          | Ile446.B, Tyr453.B, Tyr454.B, Trp549.B, Met552.B, Phe582.D, Phe589.D, Leu630.D                                                             |
| 5irx_IC                                    | -15.9          | Gly643.A, Met644.A, Tyr671.A, Asn676.A, Ile679.A, Gly643.B, Tyr671.B, Asn676.B, Ile679.B, Gly643.C, Asn676.C, Ile679.C, Ile679.D           |
|                                            | -14.1          | Phe582.A, Leu585.A, Val586.A, Phe589.A, Phe438.C, Met552.C, Leu553.C, Tyr555.C, Thr556.C, Phe559.C                                         |
|                                            | -13.7          | Phe436.C, Asn437.C, Val440.C, Ile479.C, Leu480.C, Ser483.C, Tyr487.C, Arg491.C                                                             |
|                                            | -14.1          | Phe438.A, Met552.A, Leu553.A, Tyr555.A, Thr556.A, Phe559.A, Phe582.B, Leu585.B, Val586.B, Phe589.B                                         |
|                                            | -14.1          | Phe582.C, Leu585.C, Val586.C, Phe589.C, Phe438.D, Met552.D, Leu553.D, Tyr555.D, Thr556.D, Phe559.D                                         |
|                                            | -14.1          | Phe438.B, Met552.B, Leu553.B, Tyr555.B, Thr556.B, Phe559.B, Phe582.D, Leu585.D, Val586.D, Phe589.D                                         |
|                                            | -13.7          | Phe436.D, Asn437.D, Val440.D, Ile479.D, Leu480.D, Ser483.D, Tyr487.D, Arg491.D                                                             |
| TRPV1, closed, Rat 5irz                    |                |                                                                                                                                            |
| 5irz_EC                                    |                | [none]                                                                                                                                     |
| 5irz_IC                                    | -13.9          | Phe436.E, Asn437.E, Val440.E, Ile479.E, Leu480.E, Ser483.E, Tyr487.E, Arg491.E                                                             |
|                                            | -13.9          | Phe436.C, Asn437.C, Val440.C, Ile479.C, Leu480.C, Ser483.C, Tyr487.C, Arg491.C                                                             |
|                                            | -13.9          | Phe436.D, Asn437.D, Val440.D, Ile479.D, Leu480.D, Ser483.D, Tyr487.D, Arg491.D                                                             |
|                                            | -13.8          | Phe436.B, Asn437.B, Val440.B, Ile479.B, Leu480.B, Ser483.B, Tyr487.B, Arg491.B                                                             |
| TRPV1, closed, with capsaizepine, Rat 5is0 |                |                                                                                                                                            |
| 5is0_EC                                    | -12.9          | Phe582.C, Phe589.C, Leu630.C, Ile446.D, Tyr453.D, Tyr454.D, Trp549.D, Met552.D                                                             |
|                                            | -12.9          | Phe582.D, Phe589.D, Leu630.D, Ile446.E, Tyr453.E, Tyr454.E, Trp549.E, Met552.E                                                             |
|                                            | -12.7          | Ala657.C, Ile660.C, Ile661.C, Leu664.C, Ala665.C, Ile668.C, Leu577.D, Met581.D, Tyr631.D                                                   |
|                                            | -12.5          | Ala657.B, Ile660.B, Ile661.B, Leu664.B, Ala665.B, Ile668.B, Leu577.C, Met581.C, Tyr631.C                                                   |
|                                            | -13.1          | Ile446.B, Tyr453.B, Tyr454.B, Trp549.B, Met552.B, Phe582.E, Phe589.E, Leu630.E                                                             |
|                                            | -13.0          | Phe582.B, Phe589.B, Leu630.B, Ile446.C, Tyr453.C, Tyr454.C, Trp549.C, Met552.C                                                             |

| PDB <sup>a</sup>                 | E <sup>b</sup> | Local Residues <sup>c</sup>                                                                                                                                                                                      |
|----------------------------------|----------------|------------------------------------------------------------------------------------------------------------------------------------------------------------------------------------------------------------------|
|                                  | -12.8          | Leu577.B, Met581.B, Tyr631.B, Ala657.E, Ile660.E, Ile661.E, Leu664.E, Ile668.E                                                                                                                                   |
|                                  | -12.6          | Ala657.D, Ile660.D, Ile661.D, Leu664.D, Ile668.D, Leu577.E, Met581.E, Tyr631.E                                                                                                                                   |
| Siso_IC                          | -14.1          | Phe436.D, Asn437.D, Val440.D, Ile479.D, Leu480.D, Ser483.D, Tyr487.D, Phe488.D, Arg491.D                                                                                                                         |
|                                  | -13.7          | Asn437.C, Val440.C, Ile479.C, Leu480.C, Ser483.C, Tyr487.C, Phe488.C, Arg491.C                                                                                                                                   |
|                                  | -13.2          | Ile433.B, Phe436.B, Asn437.B, Val440.B, Ile479.B, Leu480.B, Ser483.B, Tyr487.B                                                                                                                                   |
| TRPV2                            |                |                                                                                                                                                                                                                  |
| TRPV2, closed, Rabbit San8       |                |                                                                                                                                                                                                                  |
| San8_EC                          |                | [none]                                                                                                                                                                                                           |
| San8_IC                          | -14.3          | Leu540.A, Leu543.A, Val544.A, Phe547.A, Phe395.C, Leu510.C, Leu511.C, Tyr513.C, Thr514.C, Arg515.C, Phe517.C, Gln518.C                                                                                           |
|                                  | -14.0          | Phe395.A, Leu399.A, Leu403.A, Leu510.A, Thr514.A, Phe517.A, Gln518.A, Arg537.B, Leu540.B                                                                                                                         |
|                                  | -14.0          | Arg537.C, Leu540.C, Phe395.D, Leu399.D, Leu403.D, Leu510.D, Thr514.D, Phe517.D, Gln518.D                                                                                                                         |
|                                  | -14.3          | Phe395.B, Leu510.B, Leu511.B, Tyr513.B, Thr514.B, Phe517.B, Gln518.B, Leu540.D, Leu543.D, Val544.D, Phe547.D                                                                                                     |
| TRPV2, open, Rat 6bo4            |                |                                                                                                                                                                                                                  |
| 6bo4_EC                          | -17.2          | Lys602.A, Met607.A, Phe540.B, Val543.B, Tyr544.B, Leu548.B, Phe551.B, Leu555.B, Phe603.B, Thr604.B, Gly606.B, Gly608.B, Glu609.B, Leu610.B, Ala611.B, Leu626.B, Tyr629.B, Val630.B, Thr633.B, Tyr634.B, Leu638.B |
|                                  | -17.1          | Phe540.A, Val543.A, Tyr544.A, Phe547.A, Leu548.A, Phe551.A, Leu555.A, Phe603.A, Thr604.A, Gly608.A, Glu609.A, Leu610.A, Ala611.A, Tyr629.A, Val630.A, Thr633.A, Tyr634.A, Leu637.A, Leu638.A, Met607.D           |
|                                  | -17.0          | Met607.B, Phe540.C, Val543.C, Tyr544.C, Phe547.C, Leu548.C, Phe551.C, Leu555.C, Phe603.C, Thr604.C, Gly608.C, Glu609.C, Leu610.C, Ala611.C, Tyr629.C, Val630.C, Thr633.C, Tyr634.C, Leu637.C, Leu638.C           |
|                                  | -15.7          | Phe405.B, Val546.C, Phe549.C, Lys566.C, Asn571.C, Asn572.C, Ala588.C, Pro589.C                                                                                                                                   |
|                                  | -15.7          | Val546.A, Phe549.A, Lys566.A, Asn571.A, Asn572.A, Ala588.A, Pro589.A, Phe405.D                                                                                                                                   |
|                                  | -15.7          | Phe405.A, Val546.B, Phe549.B, Lys566.B, Asn571.B, Asn572.B, Ala588.B, Pro589.B                                                                                                                                   |
|                                  | -15.0          | Gly606.B, Met607.B, Leu638.B, Gly606.C, Met607.C, Tyr634.C, Val635.C, Leu638.C, Gly606.D, Met607.D, Gly608.D, Glu609.D                                                                                           |
|                                  | -14.4          | Leu538.B, Leu541.B, Leu545.B, Pro587.B, Ala588.B, Tyr590.B, Leu594.B, Leu598.B, Leu624.C                                                                                                                         |
|                                  | -14.1          | Leu538.C, Leu541.C, Leu545.C, Pro587.C, Ala588.C, Tyr590.C, Leu594.C, Leu598.C, Leu623.D, Leu624.D                                                                                                               |
|                                  | -14.1          | Leu541.A, Leu545.A, Phe549.A, Pro587.A, Ala588.A, Tyr590.A, Leu594.A, Leu598.A, Leu623.B, Leu624.B                                                                                                               |
|                                  | -17.4          | Met607.C, Phe540.D, Val543.D, Tyr544.D, Leu548.D, Phe551.D, Leu555.D, Phe603.D, Thr604.D, Gly606.D, Gly608.D, Glu609.D, Leu610.D, Ala611.D, Leu626.D, Tyr629.D, Val630.D, Thr633.D, Tyr634.D, Leu638.D           |
|                                  | -15.8          | Phe405.C, Val546.D, Phe549.D, Lys566.D, Asn571.D, Asn572.D, Ala588.D, Pro589.D                                                                                                                                   |
|                                  | -16.4          | Gly606.A, Tyr634.A, Leu638.A, Gly606.B, Met607.B, Tyr634.B, Val635.B, Leu638.B, Gly606.C, Met607.C, Gly608.C, Glu609.C                                                                                           |
|                                  | -14.0          | Leu623.A, Leu624.A, Leu627.A, Leu538.D, Leu541.D, Leu545.D, Glu586.D, Pro587.D, Ala588.D, Tyr590.D, Leu594.D, Leu598.D                                                                                           |
| 6bo4_IC                          | -15.0          | Phe462.A, Ile463.A, Trp464.A, Ile465.A, Ser466.A, Phe467.A, Met468.A, Ile474.A, Gln583.A                                                                                                                         |
|                                  | -14.6          | Leu538.A, Arg539.A, Leu541.A, Leu542.A, Leu545.A, Val546.A, Phe549.A, Phe519.D, Thr522.D                                                                                                                         |
|                                  | -14.5          | Phe519.B, Thr522.B, Phe467.C, Leu538.C, Arg539.C, Leu541.C, Leu542.C, Leu545.C, Val546.C, Phe549.C                                                                                                               |
|                                  | -14.4          | Phe405.A, Trp509.A, Phe519.A, Thr522.A, Phe467.B, Leu538.B, Arg539.B, Leu542.B, Val546.B, Phe549.B                                                                                                               |
|                                  | -14.7          | Phe462.C, Ile463.C, Trp464.C, Ile465.C, Ser466.C, Phe467.C, Met468.C, Ile474.C, Gln583.C                                                                                                                         |
|                                  | -13.7          | Phe462.B, Ile463.B, Trp464.B, Ile465.B, Ser466.B, Phe467.B, Met468.B, Ile474.B, Gln583.B                                                                                                                         |
|                                  | -15.1          | Phe462.D, Ile463.D, Trp464.D, Ile465.D, Ser466.D, Phe467.D, Met468.D, Ile474.D, Gln583.D                                                                                                                         |
|                                  | -14.5          | Phe519.C, His521.C, Thr522.C, Leu538.D, Arg539.D, Leu541.D, Leu542.D, Leu545.D, Val546.D, Phe549.D                                                                                                               |
| TRPV2, partially close, Rat 6bo5 |                |                                                                                                                                                                                                                  |
| 6bo5_EC                          | -12.5          | Leu542.A, Leu545.A, Val546.A, Phe549.A, Leu598.A, Phe601.A, Gly620.B, Val621.B, Leu624.B                                                                                                                         |
|                                  | -12.5          | Gly620.A, Val621.A, Leu624.A, Leu542.D, Leu545.D, Val546.D, Phe549.D, Leu598.D, Phe601.D                                                                                                                         |
|                                  | -12.3          | Leu478.A, Leu482.A, Trp496.A, Pro499.A, Leu500.A, Leu503.A, Phe618.B, Val621.B                                                                                                                                   |
|                                  | -12.3          | Phe618.A, Val621.A, Leu478.D, Leu482.D, Trp496.D, Pro499.D, Leu500.D, Leu503.D                                                                                                                                   |

| PDB <sup>a</sup>                          | E <sup>b</sup> | Local Residues <sup>c</sup>                                                                                                                |
|-------------------------------------------|----------------|--------------------------------------------------------------------------------------------------------------------------------------------|
|                                           | -12.5          | Leu542.C, Leu545.C, Val546.C, Phe549.C, Leu598.C, Phe601.C, Gly620.D, Val621.D, Leu624.D                                                   |
|                                           | -12.5          | Leu542.B, Leu545.B, Val546.B, Phe549.B, Leu598.B, Phe601.B, Gly620.C, Val621.C, Leu624.C                                                   |
|                                           | -12.3          | Leu478.B, Leu482.B, Trp496.B, Pro499.B, Leu500.B, Leu503.B, Phe618.C, Val621.C                                                             |
|                                           | -12.3          | Leu478.C, Leu482.C, Trp496.C, Pro499.C, Leu500.C, Leu503.C, Phe618.D, Val621.D                                                             |
| 6bo5_IC                                   | -15.6          | Phe397.A, Leu401.A, Phe405.A, Thr408.A, Trp509.A, Phe519.A, Thr522.A, Arg539.B, Leu542.B, Val546.B, Phe549.B                               |
|                                           | -15.5          | Phe397.C, Leu401.C, Phe405.C, Thr408.C, Trp509.C, Phe519.C, Thr522.C, Arg539.D, Leu542.D, Val546.D, Phe549.D                               |
|                                           | -15.5          | Arg539.A, Leu542.A, Val546.A, Phe549.A, Phe397.D, Leu401.D, Phe405.D, Thr408.D, Trp509.D, Phe519.D, Thr522.D                               |
|                                           | -14.5          | Phe456.D, Arg460.D, Leu461.D, Phe462.D, Ile463.D, Leu477.D, Leu478.D, Leu481.D                                                             |
|                                           | -14.2          | Phe456.A, Arg460.A, Leu461.A, Phe462.A, Ile463.A, Leu477.A, Leu481.A, Leu485.A                                                             |
|                                           | -13.4          | Ser466.B, Phe467.B, Met468.B, Tyr471.B, Leu538.B, Leu541.B, Leu542.B, Leu545.B, Phe549.B                                                   |
|                                           | -13.3          | Ser466.D, Phe467.D, Met468.D, Tyr471.D, Leu538.D, Leu541.D, Leu542.D, Leu545.D, Phe549.D                                                   |
|                                           | -13.8          | Ser466.A, Phe467.A, Met468.A, Tyr471.A, Ile474.A, Leu538.A, Leu541.A, Leu624.B, Leu625.B                                                   |
|                                           | -15.5          | Phe397.B, Leu401.B, Phe405.B, Thr408.B, Trp509.B, Phe519.B, Thr522.B, Arg539.C, Leu542.C, Val546.C, Phe549.C                               |
|                                           | -14.4          | Phe456.B, Arg460.B, Leu461.B, Phe462.B, Ile463.B, Leu477.B, Leu478.B, Leu481.B                                                             |
|                                           | -13.7          | Ser466.C, Phe467.C, Met468.C, Tyr471.C, Leu538.C, Leu541.C, Leu542.C, Leu545.C                                                             |
| TRPV2, with Rtx, C2 symmetry, Rabbit 6bwj |                |                                                                                                                                            |
| 6bwj_EC                                   | -13.5          | Phe547.C, Ile591.C, Leu403.D, Thr406.D, Ala407.D, Tyr410.D, His411.D, Trp507.D                                                             |
|                                           | -14.0          | Phe547.A, Arg589.A, Ser590.A, Ile591.A, Leu592.A, Leu399.B, Leu403.B, Tyr410.B                                                             |
| 6bwj_IC                                   | -17.7          | Asn394.C, Cys397.C, Tyr398.C, Tyr401.C, Leu438.C, Gly442.C, Tyr445.C, Leu446.C, Tyr512.C, Tyr513.C, Ser665.C, Glu668.C, Met669.C, Tyr673.C |
|                                           | -15.8          | Phe454.D, Arg458.D, Trp462.D, Ile463.D, Ser464.D, Phe465.D, Ile472.D, Leu475.D, Leu476.D, Leu479.D                                         |
|                                           | -14.9          | Leu451.C, Phe454.C, Trp455.C, Arg458.C, Leu459.C, Phe460.C, Leu475.C, Leu479.C, Leu483.C                                                   |
|                                           | -14.6          | Leu451.D, Phe454.D, Trp455.D, Arg458.D, Leu459.D, Leu475.D, Leu479.D, Leu483.D                                                             |
|                                           | -14.0          | Phe460.C, Trp462.C, Ile463.C, Ser464.C, Phe465.C, Ile472.C, Leu476.C, Leu479.C, Leu480.C, Leu483.C                                         |
|                                           | -17.7          | Asn394.A, Cys397.A, Tyr398.A, Tyr401.A, Leu438.A, Gly442.A, Tyr445.A, Leu446.A, Tyr512.A, Tyr513.A, Ser665.A, Glu668.A, Met669.A, Tyr673.A |
|                                           | -15.8          | Phe454.B, Trp462.B, Ile463.B, Ser464.B, Phe465.B, Ile472.B, Leu475.B, Leu476.B, Leu479.B                                                   |
|                                           | -14.9          | Leu451.A, Phe454.A, Trp455.A, Arg458.A, Leu459.A, Phe460.A, Leu475.A, Leu479.A, Leu483.A                                                   |
|                                           | -14.6          | Leu451.B, Phe454.B, Trp455.B, Arg458.B, Leu459.B, Leu475.B, Leu479.B, Leu483.B                                                             |
|                                           | -14.0          | Phe460.A, Trp462.A, Ile463.A, Ser464.A, Phe465.A, Ile472.A, Leu476.A, Leu479.A, Leu480.A, Leu483.A                                         |
| TRPV2, Ca bound, C2 symmetry, Rabbit 6bwm |                |                                                                                                                                            |
| 6bwm_EC                                   | -13.8          | Phe393.C, Leu396.C, Val400.C, Ile404.C, Met431.C, Leu434.C, Gly435.C, Leu438.C                                                             |
|                                           | -13.6          | Leu614.A, Arg615.A, Gly618.A, Leu622.A, Leu539.B, Leu540.B, Leu543.B, Leu592.B                                                             |
|                                           | -13.4          | Leu614.C, Arg615.C, Gly618.C, Leu622.C, Leu539.D, Leu540.D, Leu543.D, Leu592.D                                                             |
|                                           | -13.0          | Leu403.A, Thr406.A, Ala407.A, Tyr410.A, His411.A, Trp507.A, Leu540.D, Leu543.D, Val544.D, Phe547.D                                         |
|                                           | -12.8          | Leu396.D, Val400.D, Leu403.D, Ile404.D, Ala407.D, Met431.D, Leu432.D, Gly435.D                                                             |
|                                           | -12.4          | Leu540.B, Phe547.B, Ile591.B, Leu399.C, Leu403.C, Thr406.C, Tyr410.C, Trp507.C                                                             |
|                                           | -13.6          | Phe393.A, Leu396.A, Val400.A, Ile404.A, Met431.A, Leu434.A, Gly435.A, Leu438.A                                                             |
|                                           | -12.6          | Leu396.B, Leu399.B, Val400.B, Leu403.B, Ile404.B, Met431.B, Leu432.B, Gly435.B                                                             |
| 6bwm_IC                                   | -17.4          | Asn394.C, Cys397.C, Tyr398.C, Tyr401.C, Leu438.C, Tyr445.C, Leu446.C, Trp452.C, Tyr453.C, Glu668.C, Met669.C, Asn671.C, Gly672.C, Tyr673.C |
|                                           | -15.0          | Leu540.C, Val544.C, Phe391.D, Phe395.D, Tyr513.D, Thr514.D, Arg515.D, Gly516.D, Phe517.D, Thr520.D                                         |
|                                           | -16.9          | Arg390.C, Phe393.C, Asn394.C, Leu441.C, Tyr445.C, Gly672.C, Trp674.C, Trp675.C, Arg678.C                                                   |
|                                           | -18.0          | Asn394.A, Cys397.A, Tyr398.A, Tyr401.A, Tyr445.A, Leu446.A, Trp452.A, Tyr453.A, Glu668.A, Met669.A, Asn671.A, Gly672.A, Tyr673.A           |
|                                           | -17.4          | Arg390.A, Phe393.A, Asn394.A, Cys397.A, Leu438.A, Tyr445.A, Glu668.A, Met669.A, Asn671.A, Gly672.A, Tyr673.A, Trp674.A                     |

| PDB <sup>a</sup> | E <sup>b</sup> | Local Residues <sup>c</sup>                                                                        |
|------------------|----------------|----------------------------------------------------------------------------------------------------|
|                  | -15.4          | Leu540.A, Val544.A, Phe391.B, Phe395.B, Tyr513.B, Thr514.B, Arg515.B, Gly516.B, Phe517.B, Thr520.B |

## TRPV3

## TRPV3, with bromo 2-APB, Mouse 6dvy

|         |       |                                                                                                              |
|---------|-------|--------------------------------------------------------------------------------------------------------------|
| 6dvy_EC | -15.5 | Phe447.D, Phe450.D, Ile453.D, Thr454.D, Leu457.D, Val458.D, Leu482.D, Gln483.D, Leu485.D, Gly486.D           |
|         | -15.5 | Phe447.A, Phe450.A, Ile453.A, Thr454.A, Leu457.A, Val458.A, Leu482.A, Gln483.A, Leu485.A, Gly486.A           |
|         | -15.5 | Phe447.C, Phe450.C, Ile453.C, Thr454.C, Leu457.C, Val458.C, Leu482.C, Gln483.C, Leu485.C, Gly486.C, Arg487.C |
|         | -13.3 | Phe449.A, Ile453.A, Thr456.A, Leu457.A, Tyr460.A, Tyr461.A, Leu588.D, Phe592.D, Ile595.D, Leu599.D, Phe625.D |
|         | -13.2 | Leu588.C, Phe592.C, Ile595.C, Leu599.C, Phe625.C, Phe449.D, Ile453.D, Thr456.D, Leu457.D, Tyr460.D, Tyr461.D |
|         | -13.1 | Leu588.B, Phe592.B, Ile595.B, Leu599.B, Phe625.B, Phe449.C, Ile453.C, Thr456.C, Leu457.C, Tyr460.C, Tyr461.C |
|         | -15.5 | Phe447.B, Phe450.B, Ile453.B, Thr454.B, Leu457.B, Val458.B, Leu482.B, Gln483.B, Leu485.B, Gly486.B, Arg487.B |
|         | -13.3 | Leu588.A, Phe592.A, Ile595.A, Leu599.A, Phe625.A, Phe449.B, Ile453.B, Thr456.B, Leu457.B, Tyr460.B, Tyr461.B |
| 6dvy_IC |       | [none]                                                                                                       |

## TRPV3, closed, Human 6mho

|         |       |                                                                                                                                  |
|---------|-------|----------------------------------------------------------------------------------------------------------------------------------|
| 6mho_EC | -13.7 | Phe449.B, Tyr460.B, Tyr461.B, Trp559.B, Phe592.C, Val596.C, Leu599.C, Val603.C, Phe625.C                                         |
|         | -13.5 | Phe592.A, Val596.A, Leu599.A, Val603.A, Phe625.A, Phe449.D, Tyr460.D, Tyr461.D, Trp559.D                                         |
|         | -13.5 | Phe449.C, Tyr460.C, Tyr461.C, Trp559.C, Met562.C, Phe592.D, Val596.D, Leu599.D, Val603.D, Phe625.D                               |
|         | -13.3 | Tyr544.C, Glu546.C, Ala549.C, Leu553.C, Tyr650.D, Ile652.D, Leu653.D, Phe656.D                                                   |
|         | -13.2 | Leu591.A, Ile595.A, Ser626.A, Asp627.A, Leu630.A, Ile652.B, Leu655.B, Phe656.B, Ile659.B                                         |
|         | -13.1 | Ile652.A, Leu655.A, Phe656.A, Ile659.A, Leu591.D, Ile595.D, Ser626.D, Leu630.D                                                   |
|         | -12.9 | Tyr650.A, Ile652.A, Leu653.A, Phe656.A, Tyr544.D, Glu546.D, Ala549.D, Leu553.D                                                   |
|         | -12.8 | Phe590.C, Leu591.C, Tyr594.C, Ile595.C, Leu598.C, Ser626.C, Leu630.C, Phe633.C, Ile652.D, Leu655.D, Phe656.D, Ile659.D, Ile663.D |
|         | -13.9 | Phe449.A, Tyr460.A, Tyr461.A, Trp559.A, Met562.A, Phe592.B, Val596.B, Leu599.B, Val603.B, Phe625.B                               |
|         | -13.6 | Tyr544.A, Glu546.A, Ala549.A, Leu553.A, Tyr650.B, Ile652.B, Leu653.B, Phe656.B                                                   |
|         | -13.4 | Tyr544.B, Glu546.B, Ala549.B, Leu553.B, Tyr650.C, Ile652.C, Leu653.C, Phe656.C                                                   |
|         | -13.1 | Leu591.B, Ser626.B, Asp627.B, Leu630.B, Ile652.C, Leu655.C, Phe656.C, Ile659.C                                                   |
|         | -12.8 | Phe590.C, Leu591.C, Tyr594.C, Ile595.C, Leu598.C, Ser626.C, Leu630.C, Phe633.C, Ile652.D, Leu655.D, Phe656.D, Ile659.D, Ile663.D |
| 6mho_IC | -13.2 | Ile505.C, Phe506.C, Leu508.C, Phe527.C, Ile528.C, Val531.C, Leu532.C, Leu535.C                                                   |
|         | -13.2 | Phe447.D, Met488.D, Phe489.D, Ile492.D, Trp493.D, Cys496.D, Lys500.D, Met706.D                                                   |
|         | -13.0 | Ile505.D, Phe506.D, Phe527.D, Ile528.D, Val531.D, Leu532.D, Leu535.D, Cys550.D                                                   |
|         | -12.8 | Trp521.C, Gln580.C, Ile583.C, Leu584.C, Leu588.C, Leu591.C, Ile595.C, Ile659.D, Ile663.D                                         |
|         | -12.4 | Val499.C, Gly502.C, Ile503.C, Phe506.C, Phe527.C, Val531.C, Ile534.C, Leu535.C                                                   |
|         | -13.2 | Phe447.C, Met488.C, Phe489.C, Ile492.C, Trp493.C, Cys496.C, Lys500.C, Met706.C                                                   |
|         | -12.6 | Ser498.D, Val499.D, Gly502.D, Ile503.D, Phe506.D, Phe527.D, Val531.D, Ile534.D, Leu535.D                                         |
|         | -13.5 | Trp521.A, Gln580.A, Ile583.A, Leu584.A, Leu588.A, Leu591.A, Ile595.A, Ile659.B, Ile663.B                                         |
|         | -13.2 | Phe447.B, Met488.B, Phe489.B, Ile492.B, Trp493.B, Cys496.B, Lys500.B, Met706.B                                                   |
|         | -13.1 | Ile505.A, Phe506.A, Phe527.A, Ile528.A, Val531.A, Leu532.A, Leu535.A, Cys550.A                                                   |
|         | -13.0 | Ile505.B, Phe506.B, Phe527.B, Ile528.B, Val531.B, Leu532.B, Leu535.B, Cys550.B                                                   |
|         | -13.0 | Trp521.B, Gln580.B, Ile583.B, Leu584.B, Leu588.B, Leu591.B, Ile595.B, Ile659.C, Ile663.C                                         |
|         | -12.6 | Met495.B, Ser498.B, Val499.B, Gly502.B, Ile503.B, Phe527.B, Ile534.B, Leu535.B, Phe538.B                                         |
|         | -12.5 | Ser498.A, Val499.A, Gly502.A, Ile503.A, Phe527.A, Ile534.A, Leu535.A, Phe538.A                                                   |

## TRPV3, with 2-APB, Human 6mhs

| PDB <sup>a</sup>                           | E <sup>b</sup>                                                                                               | Local Residues <sup>c</sup>                                                                                            |                                                                                                    |
|--------------------------------------------|--------------------------------------------------------------------------------------------------------------|------------------------------------------------------------------------------------------------------------------------|----------------------------------------------------------------------------------------------------|
| 6mhs_EC                                    | -15.2                                                                                                        | Phe592.A, Val596.A, Leu599.A, Val603.A, Phe625.A, Phe449.D, Leu457.D, Tyr460.D, Tyr461.D, Trp559.D, Met562.D           |                                                                                                    |
|                                            | -15.1                                                                                                        | Phe449.C, Leu457.C, Tyr460.C, Tyr461.C, Trp559.C, Phe592.D, Val596.D, Leu599.D, Val603.D, Phe625.D                     |                                                                                                    |
|                                            | -15.1                                                                                                        | Phe449.B, Leu457.B, Tyr460.B, Tyr461.B, Trp559.B, Met562.B, Phe592.C, Val596.C, Leu599.C, Val603.C, Phe625.C           |                                                                                                    |
|                                            | -13.7                                                                                                        | Leu591.A, Ile595.A, Ser626.A, Val629.A, Leu630.A, Ile644.B, Ile652.B, Leu655.B, Phe656.B                               |                                                                                                    |
|                                            | -13.7                                                                                                        | Ile644.A, Ile652.A, Leu655.A, Phe656.A, Leu591.D, Ile595.D, Ser626.D, Val629.D, Leu630.D                               |                                                                                                    |
|                                            | -13.7                                                                                                        | Leu591.C, Ile595.C, Ser626.C, Val629.C, Leu630.C, Ile644.D, Ile652.D, Leu655.D, Phe656.D                               |                                                                                                    |
|                                            | -15.2                                                                                                        | Phe449.A, Leu457.A, Tyr460.A, Tyr461.A, Trp559.A, Met562.A, Phe592.B, Val596.B, Leu599.B, Val603.B, Phe625.B           |                                                                                                    |
|                                            | -13.7                                                                                                        | Leu591.B, Ile595.B, Ser626.B, Val629.B, Leu630.B, Ile644.C, Ile652.C, Leu655.C, Phe656.C, Ile659.C                     |                                                                                                    |
|                                            | 6mhs_IC                                                                                                      | -14.9                                                                                                                  | Phe656.A, Ile659.A, Thr660.A, Ile663.A, Leu664.A, Ser518.D, Trp521.D, Gln580.D, Ile583.D, Leu588.D |
|                                            |                                                                                                              | -14.8                                                                                                                  | Ser518.C, Trp521.C, Gln580.C, Ile583.C, Leu588.C, Phe656.D, Ile659.D, Thr660.D, Ile663.D, Leu664.D |
| -13.0                                      |                                                                                                              | Phe601.A, Thr660.A, Leu664.A, Ser518.D, Trp521.D, Ala556.D, Leu557.D, Ala560.D, Gln580.D, Ile583.D, Leu584.D, Leu588.D |                                                                                                    |
| -13.0                                      |                                                                                                              | Trp521.C, Ala556.C, Leu557.C, Ala560.C, Gln580.C, Ile583.C, Leu584.C, Leu588.C, Phe601.D, Thr660.D, Leu664.D           |                                                                                                    |
| -12.5                                      |                                                                                                              | Phe656.A, Ser571.C, Met572.C, Leu588.D, Lys589.D, Leu591.D, Phe592.D, Ile595.D                                         |                                                                                                    |
| -12.5                                      |                                                                                                              | Leu588.A, Lys589.A, Leu591.A, Phe592.A, Ile595.A, Phe656.B, Ser571.D, Met572.D                                         |                                                                                                    |
| -12.5                                      |                                                                                                              | Ser571.B, Met572.B, Leu588.C, Lys589.C, Leu591.C, Phe592.C, Ile595.C, Phe656.D                                         |                                                                                                    |
| -14.9                                      |                                                                                                              | Ser518.A, Trp521.A, Gln580.A, Ile583.A, Leu588.A, Phe656.B, Ile659.B, Thr660.B, Ile663.B, Leu664.B                     |                                                                                                    |
| -14.8                                      |                                                                                                              | Ser518.B, Trp521.B, Gln580.B, Ile583.B, Leu588.B, Phe656.C, Ile659.C, Thr660.C, Ile663.C, Leu664.C                     |                                                                                                    |
| -13.0                                      |                                                                                                              | Ser518.B, Trp521.B, Ala556.B, Leu557.B, Ala560.B, Gln580.B, Ile583.B, Leu584.B, Leu588.B, Phe601.C, Thr660.C, Leu664.C |                                                                                                    |
| -13.0                                      | Trp521.A, Ala556.A, Leu557.A, Ala560.A, Gln580.A, Ile583.A, Leu584.A, Leu588.A, Phe601.B, Thr660.B, Leu664.B |                                                                                                                        |                                                                                                    |
| -12.5                                      | Ser571.A, Met572.A, Leu588.B, Lys589.B, Leu591.B, Phe592.B, Ile595.B, Phe656.C                               |                                                                                                                        |                                                                                                    |
| TRPV3, with 2-APB, Human 6mhv              |                                                                                                              |                                                                                                                        |                                                                                                    |
| 6mhv_EC                                    | -14.5                                                                                                        | Phe592.A, Val596.A, Leu599.A, Val603.A, Phe625.A, Phe449.D, Tyr460.D, Tyr461.D, Trp559.D, Met562.D                     |                                                                                                    |
|                                            | -14.5                                                                                                        | Phe449.A, Tyr460.A, Tyr461.A, Trp559.A, Met562.A, Phe592.B, Val596.B, Leu599.B, Val603.B, Phe625.B                     |                                                                                                    |
|                                            | -14.5                                                                                                        | Phe449.C, Tyr460.C, Tyr461.C, Trp559.C, Met562.C, Phe592.D, Val596.D, Leu599.D, Val603.D, Phe625.D                     |                                                                                                    |
|                                            | -12.8                                                                                                        | Ile644.A, Ile652.A, Leu655.A, Phe656.A, Ile659.A, Leu591.D, Ile595.D, Ser626.D, Asp627.D, Leu630.D                     |                                                                                                    |
|                                            | -12.8                                                                                                        | Leu591.A, Ile595.A, Ser626.A, Leu630.A, Ile644.B, Ile652.B, Leu655.B, Phe656.B, Ile659.B                               |                                                                                                    |
|                                            | -12.8                                                                                                        | Leu591.B, Ile595.B, Ser626.B, Asp627.B, Leu630.B, Ile644.C, Ile652.C, Leu655.C, Phe656.C, Ile659.C                     |                                                                                                    |
|                                            | -14.5                                                                                                        | Phe449.B, Tyr460.B, Tyr461.B, Trp559.B, Met562.B, Phe592.C, Val596.C, Leu599.C, Val603.C, Phe625.C                     |                                                                                                    |
|                                            | -12.8                                                                                                        | Leu591.C, Ile595.C, Ser626.C, Leu630.C, Ile644.D, Ile652.D, Leu655.D, Phe656.D, Ile659.D                               |                                                                                                    |
| 6mhv_IC                                    | -13.1                                                                                                        | Ser498.A, Val499.A, Gly502.A, Ile503.A, Phe527.A, Ile534.A, Leu535.A, Phe538.A                                         |                                                                                                    |
|                                            | -13.1                                                                                                        | Ser498.D, Val499.D, Gly502.D, Ile503.D, Phe527.D, Ile534.D, Leu535.D, Phe538.D                                         |                                                                                                    |
|                                            | -12.9                                                                                                        | Phe569.A, Met572.A, Leu588.B, Lys589.B, Leu591.B, Phe592.B, Ile595.B, Phe656.C                                         |                                                                                                    |
|                                            | -12.9                                                                                                        | Phe656.A, Phe569.C, Met572.C, Leu588.D, Lys589.D, Leu591.D, Phe592.D, Ile595.D                                         |                                                                                                    |
|                                            | -12.9                                                                                                        | Leu588.A, Lys589.A, Leu591.A, Phe592.A, Ile595.A, Phe656.B, Phe569.D, Met572.D                                         |                                                                                                    |
|                                            | -13.0                                                                                                        | Ser498.C, Val499.C, Gly502.C, Ile503.C, Phe506.C, Phe527.C, Ile534.C, Leu535.C, Phe538.C                               |                                                                                                    |
|                                            | -13.0                                                                                                        | Ser498.B, Val499.B, Gly502.B, Ile503.B, Phe527.B, Ile534.B, Leu535.B, Phe538.B                                         |                                                                                                    |
|                                            | -12.9                                                                                                        | Phe569.B, Met572.B, Leu588.C, Lys589.C, Leu591.C, Phe592.C, Ile595.C, Phe656.D                                         |                                                                                                    |
| TRPV3, with 2-APB, C2 symmetry, Human 6mhw |                                                                                                              |                                                                                                                        |                                                                                                    |
| 6mhw_EC                                    | -14.1                                                                                                        | Phe449.A, Ile453.A, Thr456.A, Leu457.A, Tyr460.A, Tyr461.A, Trp559.A, Met562.A, Phe592.B, Val596.B, Leu599.B, Val603.B |                                                                                                    |
|                                            | -13.6                                                                                                        | Phe449.B, Tyr460.B, Tyr461.B, Trp559.B, Met562.B, Phe592.C, Val596.C, Leu599.C, Val603.C                               |                                                                                                    |
|                                            | -12.8                                                                                                        | Phe592.A, Leu599.A, Val603.A, Phe625.A, Phe449.D, Leu457.D, Tyr460.D, Trp559.D                                         |                                                                                                    |
|                                            | -14.9                                                                                                        | Phe449.C, Ile453.C, Tyr460.C, Tyr461.C, Trp559.C, Met562.C, Phe592.D, Val596.D, Leu599.D, Val603.D                     |                                                                                                    |

| PDB <sup>a</sup>                            | E <sup>b</sup>                                                                                                                   | Local Residues <sup>c</sup>                                                                                                      |
|---------------------------------------------|----------------------------------------------------------------------------------------------------------------------------------|----------------------------------------------------------------------------------------------------------------------------------|
| 6mhw_IC                                     | -13.9                                                                                                                            | Ser518.A, Trp521.A, Gln580.A, Ile583.A, Leu584.A, Leu588.A, Phe656.B, Ile659.B, Thr660.B, Ile663.B                               |
|                                             | -13.0                                                                                                                            | Ser498.A, Val499.A, Gly502.A, Ile503.A, Phe506.A, Phe527.A, Ile534.A, Leu535.A, Phe538.A                                         |
|                                             | -12.4                                                                                                                            | Val499.B, Gly502.B, Ile503.B, Phe506.B, Phe527.B, Val531.B, Ile534.B, Leu535.B                                                   |
|                                             | -13.2                                                                                                                            | Ser518.C, Trp521.C, Leu584.C, Leu588.C, Leu591.C, Phe656.D, Ile659.D, Thr660.D, Ile663.D                                         |
|                                             | -12.7                                                                                                                            | Ser498.C, Val499.C, Gly502.C, Ile503.C, Phe506.C, Phe527.C, Ile534.C, Leu535.C                                                   |
| TRPV3, with 2-APB, C2 symmetry, Human 6mhx  |                                                                                                                                  |                                                                                                                                  |
| 6mhx_EC                                     | -15.2                                                                                                                            | Phe449.A, Ile453.A, Thr456.A, Leu457.A, Tyr460.A, Tyr461.A, Trp559.A, Met562.A, Phe592.B, Val596.B, Leu599.B, Val603.B           |
|                                             | -15.2                                                                                                                            | Phe449.C, Ile453.C, Thr456.C, Leu457.C, Tyr460.C, Tyr461.C, Trp559.C, Met562.C, Phe592.D, Val596.D, Leu599.D, Val603.D           |
|                                             | -14.4                                                                                                                            | Phe592.A, Val596.A, Leu599.A, Phe449.D, Ile453.D, Thr456.D, Leu457.D, Tyr460.D, Tyr461.D, Trp559.D, Met562.D                     |
|                                             | -13.2                                                                                                                            | Ser498.A, Phe527.A, Val531.A, Ile534.A, Leu535.A, Phe538.A, Leu539.A, Tyr544.A                                                   |
|                                             | -14.4                                                                                                                            | Phe449.B, Ile453.B, Thr456.B, Leu457.B, Tyr460.B, Tyr461.B, Trp559.B, Met562.B, Phe592.C, Val596.C, Leu599.C                     |
| -13.2                                       | Ser498.C, Phe527.C, Val531.C, Ile534.C, Leu535.C, Phe538.C, Leu539.C, Tyr544.C                                                   |                                                                                                                                  |
| 6mhx_IC                                     | [none]                                                                                                                           |                                                                                                                                  |
| TRPV4                                       |                                                                                                                                  |                                                                                                                                  |
| TRPV4, closed, Xenopus 6bbj                 |                                                                                                                                  |                                                                                                                                  |
| 6bbj_EC                                     | [none]                                                                                                                           |                                                                                                                                  |
| 6bbj_IC                                     | -13.7                                                                                                                            | Leu619.B, Gly623.B, Val471.D, Leu475.D, Trp582.D, Met583.D, Ala585.D, Leu586.D, Phe588.D, Thr589.D                               |
|                                             | -13.6                                                                                                                            | Val471.A, Leu475.A, Trp582.A, Met583.A, Ala585.A, Leu586.A, Phe588.A, Thr589.A, Leu619.C, Gly623.C                               |
|                                             | -13.6                                                                                                                            | Leu619.A, Gly623.A, Val471.B, Leu475.B, Trp582.B, Met583.B, Ala585.B, Leu586.B, Phe588.B, Thr589.B                               |
|                                             | -13.6                                                                                                                            | Val471.C, Leu475.C, Trp582.C, Met583.C, Ala585.C, Leu586.C, Phe588.C, Thr589.C, Leu619.D, Gly623.D                               |
| TRPV5                                       |                                                                                                                                  |                                                                                                                                  |
| TRPV5, closed, bound econazole, Rabbit 6b5v |                                                                                                                                  |                                                                                                                                  |
| 6b5v_EC                                     | -13.8                                                                                                                            | Val427.C, Thr431.C, Leu435.C, Leu438.C, Met447.C, Glu450.C, Pro453.C, Phe456.C                                                   |
|                                             | -13.8                                                                                                                            | Val427.D, Thr431.D, Leu435.D, Leu438.D, Met447.D, Glu450.D, Pro453.D, Phe456.D                                                   |
|                                             | -13.4                                                                                                                            | Val397.C, Leu400.C, Leu401.C, Leu437.C, Met440.C, Val441.C, Arg443.C, Leu444.C                                                   |
|                                             | -13.7                                                                                                                            | Val427.A, Thr431.A, Leu435.A, Leu438.A, Met447.A, Glu450.A, Pro453.A, Phe456.A, Leu460.A                                         |
|                                             | -12.8                                                                                                                            | Cys556.B, Ile557.B, Ala560.B, Ile564.B, Pro527.D, Thr528.D, Phe531.D, Phe534.D                                                   |
|                                             | -12.8                                                                                                                            | Cys556.A, Ile557.A, Ala560.A, Ile564.A, Pro527.B, Thr528.B, Phe531.B, Phe534.B                                                   |
|                                             | -13.7                                                                                                                            | Val427.B, Thr431.B, Leu435.B, Leu438.B, Met447.B, Glu450.B, Pro453.B, Phe456.B                                                   |
|                                             | -13.4                                                                                                                            | Val397.A, Leu400.A, Leu401.A, Leu437.A, Met440.A, Val441.A, Arg443.A, Leu444.A                                                   |
| 6b5v_IC                                     | -14.3                                                                                                                            | Leu332.D, Leu335.D, Tyr336.D, Leu338.D, Tyr339.D, Cys342.D, Val391.D, Ile398.D, Ile399.D, Leu402.D, Glu403.D, Met603.D, Met608.D |
|                                             | -14.2                                                                                                                            | Leu332.C, Leu335.C, Tyr336.C, Leu338.C, Tyr339.C, Cys342.C, Val391.C, Ile398.C, Ile399.C, Leu402.C, Met603.C, Lys607.C, Met608.C |
|                                             | -14.1                                                                                                                            | Ile557.B, Thr558.B, Ala561.B, Ile565.B, Pro424.D, Val427.D, Ile428.D, Phe456.D, Val459.D, Leu460.D, Gln483.D, Ile486.D, Phe487.D |
|                                             | -14.1                                                                                                                            | Pro424.C, Val427.C, Ile428.C, Phe456.C, Val459.C, Leu460.C, Gln483.C, Ile486.C, Phe487.C, Ile557.D, Thr558.D, Ala561.D, Ile565.D |
|                                             | -14.2                                                                                                                            | Ile557.A, Thr558.A, Ala561.A, Ile565.A, Pro424.B, Val427.B, Ile428.B, Phe456.B, Val459.B, Leu460.B, Gln483.B, Ile486.B, Phe487.B |
|                                             | -14.2                                                                                                                            | Leu332.B, Leu335.B, Tyr336.B, Leu338.B, Tyr339.B, Cys342.B, Val391.B, Ile398.B, Ile399.B, Leu402.B, Met603.B, Lys607.B, Met608.B |
|                                             | -14.2                                                                                                                            | Leu332.A, Leu335.A, Tyr336.A, Leu338.A, Tyr339.A, Cys342.A, Val391.A, Ile398.A, Ile399.A, Leu402.A, Met603.A, Lys607.A, Met608.A |
| -14.1                                       | Pro424.A, Val427.A, Ile428.A, Phe456.A, Val459.A, Leu460.A, Gln483.A, Ile486.A, Phe487.A, Ile557.C, Thr558.C, Ala561.C, Ile565.C |                                                                                                                                  |

| PDB <sup>a</sup>                                | E <sup>b</sup> | Local Residues <sup>c</sup>                                                                                                                                              |                                                                                                                                                      |
|-------------------------------------------------|----------------|--------------------------------------------------------------------------------------------------------------------------------------------------------------------------|------------------------------------------------------------------------------------------------------------------------------------------------------|
| TRPV5, closed, Rabbit 6dmr                      |                |                                                                                                                                                                          |                                                                                                                                                      |
| 6dmr_EC                                         | -14.8          | Val499.A, Leu502.A, Tyr526.A, Ile337.B, Ile341.B, Thr344.B, Thr345.B, Ile348.B, Tyr349.B, Trp462.B                                                                       |                                                                                                                                                      |
|                                                 | -14.6          | Ile337.A, Ile341.A, Thr344.A, Thr345.A, Ile348.A, Tyr349.A, Trp462.A, Val465.A, Val499.C, Leu502.C, Tyr526.C                                                             |                                                                                                                                                      |
|                                                 | -14.5          | Ile337.C, Ile341.C, Thr344.C, Thr345.C, Ile348.C, Tyr349.C, Trp462.C, Val465.C, Val499.D, Leu502.D, Tyr526.D                                                             |                                                                                                                                                      |
|                                                 | -13.5          | Thr431.C, Leu435.C, Leu438.C, Met442.C, Met447.C, Asn448.C, Gly449.C, Val452.C, Pro453.C, Phe456.C                                                                       |                                                                                                                                                      |
|                                                 | -13.4          | Thr431.A, Leu435.A, Leu438.A, Met442.A, Met447.A, Asn448.A, Gly449.A, Val452.A, Pro453.A, Phe456.A                                                                       |                                                                                                                                                      |
|                                                 | -13.2          | Cys556.B, Ile557.B, Ala560.B, Ile564.B, Cys494.D, Met497.D, Pro527.D, Thr528.D, Leu530.D, Phe531.D, Phe534.D                                                             |                                                                                                                                                      |
|                                                 | -13.2          | Cys494.C, Met497.C, Pro527.C, Thr528.C, Leu530.C, Phe531.C, Phe534.C, Cys556.D, Ile557.D, Ala560.D, Ile564.D                                                             |                                                                                                                                                      |
|                                                 | -13.1          | Cys494.A, Met497.A, Pro527.A, Leu530.A, Phe531.A, Phe534.A, Cys556.C, Ile557.C, Ala560.C, Ile564.C                                                                       |                                                                                                                                                      |
|                                                 | -14.8          | Val499.B, Leu502.B, Tyr526.B, Ile337.D, Ile341.D, Thr344.D, Thr345.D, Ile348.D, Tyr349.D, Trp462.D                                                                       |                                                                                                                                                      |
|                                                 | -13.7          | Thr431.D, Leu435.D, Leu438.D, Met442.D, Met447.D, Asn448.D, Gly449.D, Val452.D, Pro453.D, Phe456.D                                                                       |                                                                                                                                                      |
|                                                 | -13.5          | Thr431.B, Leu435.B, Leu438.B, Met442.B, Met447.B, Asn448.B, Gly449.B, Val452.B, Pro453.B, Phe456.B                                                                       |                                                                                                                                                      |
|                                                 | -13.1          | Cys556.A, Ile557.A, Ala560.A, Ile564.A, Cys494.B, Met497.B, Pro527.B, Thr528.B, Leu530.B, Phe531.B, Phe534.B                                                             |                                                                                                                                                      |
|                                                 | 6dmr_IC        | -15.6                                                                                                                                                                    | Phe425.C, Phe456.C, Val459.C, Leu460.C, Cys463.C, Met466.C, Thr479.C, Ile480.C, Ile482.C, Gln483.C, Ile486.C, Phe504.D, Thr558.D, Ala561.D, Ile565.D |
|                                                 |                | -15.6                                                                                                                                                                    | Phe425.A, Phe456.A, Val459.A, Leu460.A, Cys463.A, Met466.A, Thr479.A, Ile480.A, Ile482.A, Gln483.A, Ile486.A, Phe504.C, Thr558.C, Ala561.C, Ile565.C |
|                                                 |                | -13.0                                                                                                                                                                    | Phe329.C, Ala333.C, Ile337.C, Val465.C, Phe468.C, Ala469.C, Gly471.C, Phe472.C, Leu475.C, Trp495.D, Ala498.D, Val499.D, Leu530.D                     |
| -12.9                                           |                | Phe329.A, Cys330.A, Ala333.A, Ile337.A, Val465.A, Phe468.A, Ala469.A, Phe472.A, Leu475.A, Trp495.C, Ala498.C, Val499.C, Leu530.C                                         |                                                                                                                                                      |
| -12.9                                           |                | Trp495.A, Ala498.A, Val499.A, Leu530.A, Phe329.B, Ala333.B, Ile337.B, Val465.B, Phe468.B, Ala469.B, Gly471.B, Phe472.B, Leu475.B                                         |                                                                                                                                                      |
| -15.6                                           |                | Phe504.B, Thr558.B, Ala561.B, Ile565.B, Phe425.D, Phe456.D, Val459.D, Leu460.D, Cys463.D, Met466.D, Thr479.D, Ile480.D, Ile482.D, Gln483.D, Ile486.D                     |                                                                                                                                                      |
| -15.5                                           |                | Phe504.A, Thr558.A, Ala561.A, Ile565.A, Phe425.B, Phe456.B, Val459.B, Leu460.B, Cys463.B, Met466.B, Thr479.B, Ile480.B, Ile482.B, Gln483.B, Ile486.B                     |                                                                                                                                                      |
| -12.9                                           |                | Trp495.B, Ala498.B, Val499.B, Leu530.B, Phe329.D, Cys330.D, Ala333.D, Ile337.D, Val465.D, Phe468.D, Ala469.D, Phe472.D, Leu475.D                                         |                                                                                                                                                      |
| TRPV5, closed, bound PtdIns(4,5)P2, Rabbit 6dmu |                |                                                                                                                                                                          |                                                                                                                                                      |
| 6dmu_EC                                         |                | -14.2                                                                                                                                                                    | Leu502.A, Ile337.B, Ile341.B, Thr344.B, Thr345.B, Ile348.B, Tyr349.B, Trp462.B                                                                       |
|                                                 | -14.2          | Ile337.A, Ile341.A, Thr344.A, Thr345.A, Ile348.A, Tyr349.A, Trp462.A, Leu502.C                                                                                           |                                                                                                                                                      |
|                                                 | -14.1          | Leu502.B, Tyr526.B, Ile337.D, Ile341.D, Thr344.D, Thr345.D, Ile348.D, Tyr349.D, Trp462.D                                                                                 |                                                                                                                                                      |
|                                                 | -13.3          | Cys494.C, Ala498.C, Ile501.C, Pro527.C, Leu530.C, Phe531.C, Phe534.C, Phe553.D, Cys556.D, Ile557.D                                                                       |                                                                                                                                                      |
|                                                 | -13.2          | Cys494.A, Pro527.A, Phe531.A, Phe553.C, Cys556.C, Ile557.C, Ala560.C, Ile564.C                                                                                           |                                                                                                                                                      |
|                                                 | -13.2          | Phe553.A, Cys556.A, Ile557.A, Ala560.A, Ile564.A, Cys494.B, Pro527.B, Phe531.B                                                                                           |                                                                                                                                                      |
|                                                 | -13.0          | Leu335.A, Leu338.A, Cys342.A, Thr345.A, Tyr349.A, Gln381.A, Ile384.A, Arg385.A, Val391.A                                                                                 |                                                                                                                                                      |
|                                                 | -13.9          | Leu335.B, Leu338.B, Cys342.B, Thr345.B, Tyr349.B, Gln381.B, Ile384.B, Arg385.B, Val391.B                                                                                 |                                                                                                                                                      |
|                                                 | -14.1          | Ile337.C, Ile341.C, Thr344.C, Thr345.C, Ile348.C, Tyr349.C, Trp462.C, Leu502.D, Tyr526.D                                                                                 |                                                                                                                                                      |
|                                                 | -13.2          | Phe553.B, Cys556.B, Ile557.B, Cys494.D, Ala498.D, Ile501.D, Pro527.D, Leu530.D, Phe531.D, Phe534.D                                                                       |                                                                                                                                                      |
|                                                 | -13.0          | Leu335.C, Leu338.C, Cys342.C, Thr345.C, Tyr349.C, Gln381.C, Ile384.C, Arg385.C, Val391.C                                                                                 |                                                                                                                                                      |
|                                                 | -13.0          | Leu335.D, Leu338.D, Cys342.D, Thr345.D, Tyr349.D, Gln381.D, Ile384.D, Arg385.D, Val391.D                                                                                 |                                                                                                                                                      |
| 6dmu_IC                                         | -16.6          | Ile337.A, Ile341.A, Trp462.A, Val465.A, Phe468.A, Ala469.A, Phe472.A, Leu475.A, Trp495.C, Leu496.C, Ala498.C, Val499.C, Leu502.C                                         |                                                                                                                                                      |
|                                                 | -16.5          | Trp495.B, Leu496.B, Ala498.B, Val499.B, Leu502.B, Ile337.D, Ile341.D, Trp462.D, Val465.D, Phe468.D, Ala469.D, Phe472.D, Leu475.D                                         |                                                                                                                                                      |
|                                                 | -16.3          | Trp495.A, Leu496.A, Ala498.A, Val499.A, Leu502.A, Ile337.B, Ile341.B, Trp462.B, Val465.B, Phe468.B, Ala469.B, Phe472.B, Leu475.B                                         |                                                                                                                                                      |
|                                                 | -14.5          | Ile557.A, Thr558.A, Ala561.A, Ile565.A, Phe425.B, Ile482.B, Phe456.B, Val459.B, Leu460.B, Cys463.B, Met466.B, Thr479.B, Ile480.B, Ile482.B, Gln483.B, Ile486.B, Phe487.B |                                                                                                                                                      |
|                                                 | -14.1          | Thr539.A, Asn572.A, Thr539.B, Ile540.B, Ile575.B, Thr539.C, Ile575.C, Thr539.D, Asn572.D, Ile575.D                                                                       |                                                                                                                                                      |
|                                                 | -13.9          | Leu332.A, Leu335.A, Tyr336.A, Leu338.A, Tyr339.A, Cys342.A, Val391.A, Gly395.A, Ile398.A, Ile399.A, Leu402.A, Lys607.A                                                   |                                                                                                                                                      |

| PDB <sup>a</sup>   | E <sup>b</sup> | Local Residues <sup>c</sup>                                                                                                                                    |
|--------------------|----------------|----------------------------------------------------------------------------------------------------------------------------------------------------------------|
|                    | -13.8          | Leu332.B, Leu335.B, Tyr336.B, Leu338.B, Tyr339.B, Cys342.B, Val391.B, Gly395.B, Ile398.B, Ile399.B, Leu402.B, Lys607.B                                         |
|                    | -13.1          | Phe425.A, Ile428.A, Phe456.A, Val459.A, Leu460.A, Cys463.A, Met466.A, Thr479.A, Ile482.A, Gln483.A, Ile486.A, Phe487.A, Ile557.C, Thr558.C, Ala561.C, Ile565.C |
|                    | -12.4          | Pro424.B, Val427.B, Ile428.B, Thr431.B, Leu435.B, Phe456.B, Leu460.B, Phe487.B                                                                                 |
|                    | -12.4          | Phe416.A, Pro424.A, Val427.A, Ile428.A, Thr431.A, Leu435.A, Phe456.A, Phe487.A                                                                                 |
|                    | -16.3          | Ile337.C, Ile341.C, Trp462.C, Val465.C, Phe468.C, Ala469.C, Phe472.C, Leu475.C, Trp495.D, Leu496.D, Ala498.D, Val499.D, Leu502.D                               |
|                    | -14.5          | Ile557.B, Thr558.B, Ala561.B, Ile565.B, Phe425.D, Ile428.D, Phe456.D, Val459.D, Leu460.D, Cys463.D, Met466.D, Thr479.D, Ile482.D, Gln483.D, Ile486.D, Phe487.D |
|                    | -14.5          | Phe425.C, Ile428.C, Phe456.C, Val459.C, Leu460.C, Cys463.C, Met466.C, Thr479.C, Ile482.C, Gln483.C, Ile486.C, Phe487.C, Ile557.D, Thr558.D, Ala561.D, Ile565.D |
|                    | -13.9          | Leu332.D, Leu335.D, Tyr336.D, Leu338.D, Tyr339.D, Cys342.D, Val391.D, Gly395.D, Ile398.D, Ile399.D, Leu402.D, Lys607.D                                         |
|                    | -13.8          | Leu332.C, Leu335.C, Tyr336.C, Leu338.C, Tyr339.C, Cys342.C, Val391.C, Gly395.C, Ile398.C, Ile399.C, Leu402.C, Lys607.C                                         |
|                    | -12.4          | Pro424.C, Val427.C, Ile428.C, Thr431.C, Leu435.C, Phe456.C, Leu460.C, Phe487.C                                                                                 |
| TRPV5, Rabbit 6o1n |                |                                                                                                                                                                |
| 6o1n_EC            | -14.2          | Ile341.A, Thr345.A, Ile348.A, Tyr349.A, Ala498.B, Leu502.B, Tyr526.B, Pro527.B, Leu530.B                                                                       |
|                    | -14.3          | Ile341.C, Thr345.C, Ile348.C, Tyr349.C, Trp462.C, Val499.D, Leu502.D, Tyr526.D                                                                                 |
|                    | -14.1          | Ile341.B, Thr345.B, Ile348.B, Tyr349.B, Trp462.B, Val499.C, Leu502.C, Tyr526.C                                                                                 |
|                    | -13.9          | Trp495.A, Ala498.A, Val499.A, Leu502.A, Tyr526.A, Pro527.A, Leu530.A, Ile341.D, Thr345.D, Ile348.D, Tyr349.D                                                   |
| 6o1n_IC            | -13.9          | Phe416.B, Pro424.B, Val427.B, Ile428.B, Phe456.B, Val459.B, Leu460.B, Phe487.B, Ile557.C, Thr558.C, Ala561.C                                                   |
|                    | -13.5          | Phe416.A, Gly417.A, Pro424.A, Val427.A, Ile428.A, Phe456.A, Val459.A, Leu460.A, Phe487.A, Ile557.B, Thr558.B, Ala561.B                                         |
|                    | -13.1          | Ala412.A, Ser413.A, Phe416.A, Val427.A, Thr431.A, Leu435.A, Leu438.A, Phe456.A                                                                                 |
|                    | -13.0          | Ala412.B, Ser413.B, Phe416.B, Val427.B, Thr431.B, Leu435.B, Leu438.B, Phe456.B                                                                                 |
|                    | -14.4          | Pro424.C, Phe425.C, Ile428.C, Phe456.C, Leu460.C, Met466.C, Thr479.C, Ile480.C, Ile482.C, Gln483.C, Ile486.C, Phe487.C, Ile557.D, Thr558.D, Ala561.D, Ile565.D |
|                    | -13.8          | Phe416.C, Gly417.C, Pro424.C, Val427.C, Ile428.C, Phe456.C, Val459.C, Leu460.C, Phe487.C, Ile557.D, Thr558.D, Ala561.D                                         |
| TRPV5, Rabbit 6o1p |                |                                                                                                                                                                |
| 6o1p_EC            | -14.7          | Ile341.C, Thr344.C, Thr345.C, Ile348.C, Tyr349.C, Trp495.D, Ala498.D, Leu502.D, Tyr526.D, Pro527.D, Leu530.D                                                   |
|                    | -14.4          | Ile341.A, Thr345.A, Ile348.A, Tyr349.A, Trp495.B, Ala498.B, Leu502.B, Tyr526.B, Pro527.B, Leu530.B                                                             |
|                    | -14.4          | Ile341.B, Thr345.B, Ile348.B, Tyr349.B, Trp495.C, Ala498.C, Leu502.C, Tyr526.C, Pro527.C, Leu530.C                                                             |
|                    | -14.6          | Trp495.A, Ala498.A, Leu502.A, Tyr526.A, Pro527.A, Leu530.A, Ile341.D, Thr345.D, Ile348.D, Tyr349.D                                                             |
| 6o1p_IC            |                | [none]                                                                                                                                                         |
| TRPV5, Rabbit 6o1u |                |                                                                                                                                                                |
| 6o1u_EC            | -14.6          | Phe553.A, Cys556.A, Ala560.A, Ile564.A, Cys494.B, Met497.B, Ala498.B, Ile501.B, Pro527.B, Thr528.B, Leu530.B, Phe531.B, Phe534.B                               |
|                    | -14.7          | Leu551.C, Phe553.C, Cys556.C, Ile557.C, Cys494.D, Ala498.D, Ile501.D, Pro527.D, Thr528.D, Leu530.D, Phe531.D, Phe534.D                                         |
|                    | -14.7          | Phe553.B, Cys556.B, Ile557.B, Ala560.B, Leu490.C, Cys494.C, Ala498.C, Ile501.C, Pro527.C, Thr528.C, Leu530.C, Phe531.C, Phe534.C                               |
|                    | -14.7          | Cys494.A, Ala498.A, Ile501.A, Pro527.A, Thr528.A, Leu530.A, Phe531.A, Phe534.A, Phe553.D, Cys556.D, Ile557.D                                                   |
|                    | -14.4          | Trp495.C, Leu502.C, Tyr526.C, Pro527.C, Leu530.C, Ile337.D, Ile341.D, Thr345.D, Ile348.D, Tyr349.D, Trp462.D                                                   |
|                    | -14.2          | Trp495.A, Leu502.A, Tyr526.A, Pro527.A, Leu530.A, Ile337.B, Ile341.B, Thr344.B, Thr345.B, Ile348.B, Tyr349.B, Trp462.B                                         |
|                    | -14.1          | Ile337.A, Ile341.A, Thr345.A, Ile348.A, Tyr349.A, Trp462.A, Trp495.D, Leu502.D, Tyr526.D, Pro527.D, Leu530.D                                                   |
|                    | -13.3          | Tyr377.D, Leu386.D, Leu390.D, Val393.D, Thr394.D, Val397.D, Leu401.D, Met440.D, Leu444.D                                                                       |
|                    | -13.2          | Tyr377.A, Leu386.A, Leu390.A, Val393.A, Thr394.A, Val397.A, Leu401.A, Met440.A, Leu444.A                                                                       |
|                    | -14.4          | Trp495.B, Ala498.B, Leu502.B, Tyr526.B, Pro527.B, Leu530.B, Thr345.C, Ile348.C, Tyr349.C                                                                       |



| PDB <sup>a</sup>                                        | E <sup>b</sup> | Local Residues <sup>c</sup>                                                                                                                |
|---------------------------------------------------------|----------------|--------------------------------------------------------------------------------------------------------------------------------------------|
|                                                         | -13.1          | Tyr377.B, Leu386.B, Leu390.B, Val393.B, Thr394.B, Val397.B, Leu401.B, Met440.B, Leu444.B                                                   |
| 6o1u_IC                                                 | -15.3          | Thr539.A, Asp542.A, Asn572.A, Ile575.A, Thr539.B, Ile575.B, Thr539.C, Asn572.C, Ile575.C, Thr539.D, Asn572.D, Ile575.D                     |
|                                                         | -14.1          | Trp495.A, Leu496.A, Val499.A, Leu502.A, Ile337.B, Ile341.B, Trp462.B, Val465.B, Met466.B, Phe468.B, Ala469.B, Gly471.B, Phe472.B, Leu475.B |
|                                                         | -14.0          | Ile337.A, Ile341.A, Trp462.A, Val465.A, Met466.A, Phe468.A, Ala469.A, Arg470.A, Phe472.A, Leu475.A, Trp495.D, Leu496.D, Val499.D, Leu502.D |
|                                                         | -14.0          | Trp495.C, Leu496.C, Val499.C, Leu502.C, Ile337.D, Ile341.D, Trp462.D, Val465.D, Met466.D, Phe468.D, Ala469.D, Phe472.D, Leu475.D           |
|                                                         | -13.0          | Leu332.D, Leu335.D, Tyr336.D, Leu338.D, Tyr339.D, Val391.D, Ile398.D, Leu402.D, Lys607.D, Met608.D                                         |
|                                                         | -13.0          | Leu332.A, Leu335.A, Tyr336.A, Leu338.A, Tyr339.A, Val391.A, Ile398.A, Leu402.A, Leu604.A, Lys607.A, Met608.A                               |
|                                                         | -12.9          | Phe504.C, Met554.C, Ile557.C, Thr558.C, Ala561.C, Phe416.D, Pro424.D, Val427.D, Ile428.D, Phe456.D, Val459.D, Leu460.D, Phe487.D           |
|                                                         | -12.0          | Phe416.A, Gly417.A, Pro424.A, Val427.A, Ile428.A, Thr431.A, Leu435.A, Val452.A, Pro453.A, Phe456.A, Leu460.A, Phe487.A                     |
|                                                         | -12.0          | Pro424.C, Val427.C, Ile428.C, Thr431.C, Leu435.C, Val452.C, Pro453.C, Phe456.C, Leu460.C, Phe487.C                                         |
|                                                         | -13.8          | Trp495.B, Leu496.B, Val499.B, Leu502.B, Ile337.C, Ile341.C, Trp462.C, Val465.C, Met466.C, Phe468.C, Ala469.C, Phe472.C, Leu475.C           |
|                                                         | -13.1          | Leu332.C, Leu335.C, Leu338.C, Tyr339.C, Cys342.C, Val391.C, Ile398.C, Leu402.C, Met608.C, Pro609.C                                         |
|                                                         | -12.8          | Leu332.B, Leu335.B, Leu338.B, Tyr339.B, Cys342.B, Val391.B, Ile398.B, Leu402.B, Met608.B                                                   |
|                                                         | -12.7          | Phe504.A, Met554.A, Ile557.A, Thr558.A, Ala561.A, Phe416.B, Gly417.B, Pro424.B, Val427.B, Ile428.B, Phe456.B, Val459.B, Leu460.B, Phe487.B |
| TRPV5, calmodulin bound, Rabbit 6o20                    |                |                                                                                                                                            |
| 6o20_EC                                                 | -14.5          | Ile337.A, Ile341.A, Thr345.A, Ile348.A, Tyr349.A, Trp462.A, Trp495.B, Ala498.B, Leu502.B, Tyr526.B, Pro527.B, Leu530.B                     |
|                                                         | -14.3          | Ile337.B, Ile341.B, Thr345.B, Ile348.B, Tyr349.B, Trp462.B, Trp495.C, Ala498.C, Leu502.C, Tyr526.C, Pro527.C, Leu530.C                     |
|                                                         | -14.2          | Ile337.C, Ile341.C, Thr345.C, Ile348.C, Tyr349.C, Trp462.C, Trp495.D, Ala498.D, Leu502.D, Tyr526.D, Pro527.D, Leu530.D                     |
|                                                         | -13.0          | Leu335.B, Leu338.B, Cys342.B, Thr345.B, Tyr349.B, Gln381.B, Ile384.B, Arg385.B, Val391.B                                                   |
|                                                         | -13.0          | Leu335.C, Leu338.C, Ile341.C, Cys342.C, Thr345.C, Tyr349.C, Ile384.C, Val391.C                                                             |
|                                                         | -12.4          | Leu386.B, Leu390.B, Val393.B, Thr394.B, Val397.B, Ile398.B, Leu401.B, Leu444.B                                                             |
|                                                         | -12.4          | Leu386.C, Leu390.C, Val393.C, Thr394.C, Val397.C, Ile398.C, Leu401.C, Leu444.C                                                             |
|                                                         | -14.5          | Trp495.A, Ala498.A, Leu502.A, Tyr526.A, Pro527.A, Leu530.A, Ile337.D, Ile341.D, Thr345.D, Ile348.D, Tyr349.D                               |
|                                                         | -13.1          | Leu335.A, Leu338.A, Ile341.A, Cys342.A, Thr345.A, Tyr349.A, Ile384.A, Arg385.A, Val391.A                                                   |
|                                                         | -13.0          | Leu335.D, Leu338.D, Cys342.D, Thr345.D, Tyr349.D, Gln381.D, Ile384.D, Arg385.D, Val391.D                                                   |
|                                                         | -12.4          | Leu386.D, Leu390.D, Val393.D, Thr394.D, Val397.D, Ile398.D, Leu401.D, Leu444.D                                                             |
| 6o20_IC                                                 | -14.0          | Phe416.B, Gly417.B, Pro424.B, Val427.B, Ile428.B, Phe456.B, Val459.B, Leu460.B, Phe487.B, Phe504.C, Ile557.C, Thr558.C, Ala561.C           |
|                                                         | -14.0          | Phe416.C, Gly417.C, Pro424.C, Val427.C, Ile428.C, Phe456.C, Val459.C, Leu460.C, Phe487.C, Phe504.D, Ile557.D, Thr558.D, Ala561.D           |
|                                                         | -14.0          | Phe416.A, Gly417.A, Pro424.A, Val427.A, Ile428.A, Phe456.A, Val459.A, Leu460.A, Phe487.A, Phe504.B, Ile557.B, Thr558.B, Ala561.B           |
|                                                         | -13.9          | Phe504.A, Ile557.A, Thr558.A, Ala561.A, Phe416.D, Gly417.D, Pro424.D, Val427.D, Ile428.D, Phe456.D, Val459.D, Leu460.D, Phe487.D           |
| TRPV6                                                   |                |                                                                                                                                            |
| TRPV6, closed, [Incomplete helices and loops], Rat 5iwk |                |                                                                                                                                            |
| 5iwk_EC                                                 | -14.2          | Ile340.D, Met344.D, Val347.D, Tyr348.D, Trp461.D, Trp494.D, Leu501.D, Tyr525.D, Pro526.D, Leu529.D                                         |
|                                                         | -14.1          | Ile340.B, Met344.B, Val347.B, Tyr348.B, Trp461.B, Trp494.B, Leu501.B, Tyr525.B, Pro526.B, Leu529.B                                         |
|                                                         | -13.3          | Met496.B, Pro526.B, Phe530.B, Phe552.D, Ser555.D, Ile556.D, Ala559.D, Ile563.D                                                             |
|                                                         | -13.3          | Phe552.A, Ser555.A, Ile556.A, Ala559.A, Ile563.A, Met496.D, Pro526.D, Phe530.D                                                             |
|                                                         | -12.4          | Thr430.D, Phe433.D, Met434.D, Val437.D, Met441.D, Val451.D, Pro452.D, Phe455.D, Phe552.D                                                   |
|                                                         | -12.4          | Thr430.A, Phe433.A, Met434.A, Val437.A, Met441.A, Val451.A, Pro452.A, Phe455.A, Phe552.A                                                   |
|                                                         | -14.1          | Ile340.A, Met344.A, Val347.A, Tyr348.A, Trp461.A, Trp494.A, Leu501.A, Tyr525.A, Pro526.A, Leu529.A                                         |

| PDB <sup>a</sup>                                                  | E <sup>b</sup> | Local Residues <sup>c</sup>                                                                                            |
|-------------------------------------------------------------------|----------------|------------------------------------------------------------------------------------------------------------------------|
|                                                                   | -14.1          | Ile340.C, Met344.C, Val347.C, Tyr348.C, Trp461.C, Trp494.C, Leu501.C, Tyr525.C, Pro526.C, Leu529.C                     |
|                                                                   | -13.3          | Phe552.B, Ser555.B, Ile556.B, Ala559.B, Ile563.B, Cys493.C, Met496.C, Ala497.C, Pro526.C, Leu529.C, Phe530.C           |
|                                                                   | -13.3          | Cys493.A, Met496.A, Ala497.A, Pro526.A, Leu529.A, Phe530.A, Phe552.C, Ser555.C, Ile556.C, Ala559.C, Ile563.C           |
|                                                                   | -12.4          | Thr430.C, Phe433.C, Met434.C, Val437.C, Met441.C, Val451.C, Pro452.C, Phe455.C, Phe552.C                               |
|                                                                   | -12.4          | Thr430.B, Phe433.B, Met434.B, Val437.B, Met441.B, Val451.B, Pro452.B, Phe455.B, Phe552.B                               |
| Siwk_IC                                                           |                | [none]                                                                                                                 |
| TRPV6, closed, Ca bound, [Incomplete helices and loops], Rat Siwp |                |                                                                                                                        |
| Siwp_EC                                                           | -13.8          | Ile340.D, Met344.D, Val347.D, Tyr348.D, Leu501.D, Tyr525.D, Pro526.D, Leu529.D                                         |
|                                                                   | -13.8          | Ile340.B, Met344.B, Val347.B, Tyr348.B, Leu501.B, Tyr525.B, Pro526.B, Leu529.B                                         |
|                                                                   | -13.3          | Ile334.B, Leu337.B, Cys341.B, Met344.B, Tyr348.B, Leu383.B, Arg384.B, Gly387.B, Val390.B                               |
|                                                                   | -13.3          | Ile334.D, Leu337.D, Cys341.D, Met344.D, Tyr348.D, Lys380.D, Leu383.D, Arg384.D, Gly387.D, Val390.D                     |
|                                                                   | -13.1          | Phe552.A, Ser555.A, Ile556.A, Ala559.A, Ile563.A, Met496.D, Pro526.D, Phe530.D                                         |
|                                                                   | -13.1          | Met496.B, Pro526.B, Phe530.B, Phe552.D, Ser555.D, Ile556.D, Ala559.D, Ile563.D                                         |
|                                                                   | -13.8          | Ile340.A, Met344.A, Val347.A, Tyr348.A, Leu501.A, Tyr525.A, Pro526.A, Leu529.A                                         |
|                                                                   | -13.7          | Ile340.C, Met344.C, Val347.C, Tyr348.C, Leu501.C, Tyr525.C, Pro526.C, Leu529.C                                         |
|                                                                   | -13.3          | Ile334.C, Leu337.C, Cys341.C, Met344.C, Tyr348.C, Lys380.C, Leu383.C, Arg384.C, Gly387.C, Val390.C                     |
|                                                                   | -13.3          | Ile334.A, Leu337.A, Cys341.A, Met344.A, Tyr348.A, Leu383.A, Arg384.A, Gly387.A, Val390.A                               |
|                                                                   | -13.1          | Phe552.B, Ser555.B, Ile556.B, Ala559.B, Ile563.B, Met496.C, Pro526.C, Phe530.C                                         |
|                                                                   | -13.1          | Met496.A, Pro526.A, Phe530.A, Phe552.C, Ser555.C, Ile556.C, Ala559.C, Ile563.C                                         |
| Siwp_IC                                                           | -13.4          | Ile334.B, Leu337.B, Tyr338.B, Cys341.B, Val390.B, Ile397.B, Val401.B, Lys606.B, Leu607.B, Pro608.B                     |
|                                                                   | -13.4          | Ile334.D, Leu337.D, Tyr338.D, Cys341.D, Val390.D, Ile397.D, Val401.D, Lys606.D, Leu607.D, Pro608.D                     |
|                                                                   | -13.4          | Ile334.A, Leu337.A, Tyr338.A, Cys341.A, Val390.A, Ile397.A, Val401.A, Lys606.A, Leu607.A, Pro608.A                     |
|                                                                   | -13.4          | Ile334.C, Leu337.C, Tyr338.C, Cys341.C, Val390.C, Ile397.C, Val401.C, Lys606.C, Leu607.C, Pro608.C                     |
| TRPV6, closed, Ba bound, [Incomplete helices and loops], Rat Siwr |                |                                                                                                                        |
| Siwr_EC                                                           | -13.8          | Ile340.B, Met344.B, Val347.B, Tyr348.B, Leu501.B, Tyr525.B, Pro526.B, Leu529.B                                         |
|                                                                   | -13.8          | Ile340.C, Met344.C, Val347.C, Tyr348.C, Leu501.C, Tyr525.C, Pro526.C, Leu529.C                                         |
|                                                                   | -13.3          | Met496.B, Ala497.B, Ile500.B, Pro526.B, Leu529.B, Phe530.B, Phe533.B, Phe552.D, Ser555.D, Ile556.D, Ala559.D, Ile563.D |
|                                                                   | -13.3          | Ile334.B, Leu337.B, Cys341.B, Met344.B, Tyr348.B, Leu383.B, Arg384.B, Gly387.B, Val390.B                               |
|                                                                   | -13.3          | Phe552.B, Ser555.B, Ile556.B, Ala559.B, Ile563.B, Met496.C, Ala497.C, Ile500.C, Pro526.C, Leu529.C, Phe530.C, Phe533.C |
|                                                                   | -13.3          | Ile334.C, Leu337.C, Cys341.C, Met344.C, Tyr348.C, Leu383.C, Arg384.C, Gly387.C, Val390.C                               |
|                                                                   | -12.9          | Phe433.B, Met434.B, Val437.B, Met441.B, Ser446.B, Gly448.B, Val451.B, Pro452.B, Phe455.B                               |
|                                                                   | -12.9          | Phe433.D, Met434.D, Val437.D, Met441.D, Ser446.D, Gly448.D, Val451.D, Pro452.D, Phe455.D                               |
|                                                                   | -13.3          | Ile334.D, Leu337.D, Cys341.D, Met344.D, Tyr348.D, Leu383.D, Arg384.D, Gly387.D, Val390.D                               |
|                                                                   | -13.8          | Ile340.D, Met344.D, Val347.D, Tyr348.D, Leu501.D, Tyr525.D, Pro526.D, Leu529.D                                         |
|                                                                   | -13.8          | Ile340.A, Met344.A, Val347.A, Tyr348.A, Leu501.A, Tyr525.A, Pro526.A, Leu529.A                                         |
|                                                                   | -13.3          | Met496.A, Ala497.A, Ile500.A, Pro526.A, Leu529.A, Phe530.A, Phe533.A, Phe552.C, Ser555.C, Ile556.C, Ala559.C, Ile563.C |
|                                                                   | -13.3          | Ile334.A, Leu337.A, Cys341.A, Met344.A, Tyr348.A, Leu383.A, Arg384.A, Gly387.A, Val390.A                               |
|                                                                   | -13.3          | Phe552.A, Ser555.A, Ile556.A, Ala559.A, Ile563.A, Met496.D, Ala497.D, Ile500.D, Pro526.D, Leu529.D, Phe530.D, Phe533.D |
|                                                                   | -13.0          | Phe433.A, Met434.A, Val437.A, Met441.A, Ser446.A, Gly448.A, Val451.A, Pro452.A, Phe455.A                               |
|                                                                   | -13.0          | Phe433.C, Met434.C, Val437.C, Met441.C, Ser446.C, Gly448.C, Val451.C, Pro452.C, Phe455.C                               |
| Siwr_IC                                                           | -13.6          | Ile334.B, Leu337.B, Tyr338.B, Cys341.B, Val390.B, Ile397.B, Val401.B, Lys606.B, Leu607.B, Pro608.B                     |
|                                                                   | -13.6          | Ile334.D, Leu337.D, Tyr338.D, Cys341.D, Val390.D, Ile397.D, Val401.D, Lys606.D, Leu607.D, Pro608.D                     |
|                                                                   | -13.5          | Ile334.C, Leu337.C, Tyr338.C, Cys341.C, Val390.C, Ile397.C, Val401.C, Lys606.C, Leu607.C, Pro608.C                     |

| PDB <sup>a</sup>                                                  | E <sup>b</sup> | Local Residues <sup>c</sup>                                                                                                                                                        |
|-------------------------------------------------------------------|----------------|------------------------------------------------------------------------------------------------------------------------------------------------------------------------------------|
|                                                                   | -13.5          | Ile334.A, Leu337.A, Tyr338.A, Cys341.A, Val390.A, Ile397.A, Val401.A, Lys606.A, Leu607.A, Pro608.A                                                                                 |
| TRPV6, closed, Gd bound, [Incomplete helices and loops], Rat 5iwt |                |                                                                                                                                                                                    |
| 5iwt_EC                                                           | -13.7          | Ile340.D, Met344.D, Val347.D, Tyr348.D, Ala497.D, Leu501.D, Tyr525.D, Leu529.D                                                                                                     |
|                                                                   | -13.7          | Ile340.A, Met344.A, Val347.A, Tyr348.A, Ala497.A, Leu501.A, Tyr525.A, Leu529.A                                                                                                     |
|                                                                   | -13.6          | Ile334.D, Leu337.D, Cys341.D, Met344.D, Tyr348.D, Lys380.D, Leu383.D, Arg384.D, Gly387.D, Val390.D                                                                                 |
|                                                                   | -13.5          | Ile334.C, Leu337.C, Cys341.C, Met344.C, Tyr348.C, Lys380.C, Leu383.C, Arg384.C, Gly387.C, Val390.C                                                                                 |
|                                                                   | -13.5          | Ile334.A, Leu337.A, Cys341.A, Met344.A, Tyr348.A, Lys380.A, Leu383.A, Arg384.A, Gly387.A, Val390.A                                                                                 |
|                                                                   | -13.2          | Phe552.A, Ser555.A, Ile556.A, Ala559.A, Ile563.A, Met496.D, Ala497.D, Pro526.D, Leu529.D                                                                                           |
|                                                                   | -13.2          | Met496.A, Ala497.A, Pro526.A, Leu529.A, Phe552.C, Ser555.C, Ile556.C, Ala559.C, Ile563.C                                                                                           |
|                                                                   | -12.6          | Thr430.A, Phe433.A, Met434.A, Val437.A, Met441.A, Gly448.A, Val451.A, Pro452.A, Phe552.A                                                                                           |
|                                                                   | -12.6          | Thr430.C, Phe433.C, Met434.C, Val437.C, Met441.C, Gly448.C, Val451.C, Pro452.C                                                                                                     |
|                                                                   | -13.7          | Ile340.C, Met344.C, Val347.C, Tyr348.C, Ala497.C, Leu501.C, Tyr525.C, Leu529.C                                                                                                     |
|                                                                   | -13.7          | Ile340.B, Met344.B, Val347.B, Tyr348.B, Ala497.B, Leu501.B, Tyr525.B, Leu529.B                                                                                                     |
|                                                                   | -13.5          | Ile334.B, Leu337.B, Cys341.B, Met344.B, Tyr348.B, Lys380.B, Leu383.B, Arg384.B, Gly387.B, Val390.B                                                                                 |
|                                                                   | -13.2          | Met496.B, Ala497.B, Pro526.B, Leu529.B, Phe552.D, Ser555.D, Ile556.D, Ala559.D, Ile563.D                                                                                           |
|                                                                   | -13.2          | Phe552.B, Ser555.B, Ile556.B, Ala559.B, Ile563.B, Met496.C, Ala497.C, Pro526.C, Leu529.C                                                                                           |
|                                                                   | -12.6          | Thr430.B, Phe433.B, Met434.B, Val437.B, Met441.B, Gly448.B, Val451.B, Pro452.B, Phe552.B                                                                                           |
|                                                                   | -12.6          | Thr430.D, Phe433.D, Met434.D, Val437.D, Met441.D, Gly448.D, Val451.D, Pro452.D                                                                                                     |
| 5iwt_IC                                                           | -13.5          | Leu331.C, Ile334.C, Tyr335.C, Leu337.C, Tyr338.C, Cys341.C, Val390.C, Gly394.C, Ile397.C, Ile398.C, Val401.C, Glu402.C, Phe424.C, Met602.C, Leu603.C, Lys606.C                     |
|                                                                   | -13.5          | Leu331.D, Ile334.D, Tyr335.D, Leu337.D, Tyr338.D, Cys341.D, Val390.D, Gly394.D, Ile397.D, Ile398.D, Val401.D, Glu402.D, Phe424.D, Lys606.D                                         |
|                                                                   | -13.5          | Leu331.B, Ile334.B, Tyr335.B, Leu337.B, Tyr338.B, Cys341.B, Val390.B, Gly394.B, Ile397.B, Ile398.B, Val401.B, Glu402.B, Phe424.B, Met602.B, Leu603.B, Lys606.B                     |
| TRPV6, [Incomplete helices and loops], Human 6bo8                 |                |                                                                                                                                                                                    |
| 6bo8_EC                                                           | -15.5          | Leu490.A, Cys494.A, Met497.A, Ala498.A, Ile501.A, Pro527.A, Met528.A, Leu530.A, Phe531.A, Phe534.A, Phe553.B, Ser556.B, Ile557.B, Ala560.B, Ile564.B                               |
|                                                                   | -14.7          | Cys494.C, Pro527.C, Met528.C, Phe531.C, Phe553.D, Ser556.D, Ile557.D, Ala560.D, Ile564.D                                                                                           |
|                                                                   | -14.5          | Cys494.B, Tyr524.B, Pro527.B, Met528.B, Phe531.B, Phe553.C, Ser556.C, Ile557.C, Ile564.C                                                                                           |
|                                                                   | -14.1          | Ile341.A, Met345.A, Ile348.A, Tyr349.A, Ala498.B, Leu502.B, Tyr526.B, Pro527.B, Leu530.B                                                                                           |
|                                                                   | -14.0          | Ala498.A, Leu502.A, Tyr526.A, Leu530.A, Ile341.D, Met345.D, Ile348.D, Tyr349.D, Trp462.D                                                                                           |
|                                                                   | -13.7          | Ile341.B, Ile348.B, Tyr349.B, Trp462.B, Ala498.C, Leu502.C, Tyr526.C, Pro527.C, Leu530.C                                                                                           |
|                                                                   | -15.1          | Phe553.A, Ser556.A, Ile557.A, Ala560.A, Ile564.A, Cys494.D, Met497.D, Ala498.D, Ile501.D, Pro527.D, Met528.D, Leu530.D, Phe531.D, Phe534.D                                         |
|                                                                   | -13.6          | Ile341.C, Met345.C, Ile348.C, Tyr349.C, Trp462.C, Trp495.D, Leu502.D, Tyr526.D                                                                                                     |
| 6bo8_IC                                                           | -17.0          | Pro424.A, Phe425.A, Leu428.A, Phe456.A, Val459.A, Leu460.A, Cys463.A, Thr479.A, Ile482.A, Gln483.A, Ile486.A, Phe487.A, Met554.B, Ile557.B, Thr558.B, Ala561.B, Ile565.B           |
|                                                                   | -16.6          | Pro424.B, Phe425.B, Leu428.B, Phe456.B, Val459.B, Leu460.B, Cys463.B, Met466.B, Thr479.B, Ile482.B, Gln483.B, Ile486.B, Phe487.B, Met554.C, Ile557.C, Thr558.C, Ala561.C, Ile565.C |
|                                                                   | -15.3          | Thr539.A, Ile575.A, Thr539.B, Ile575.B, Thr539.C, Asn572.C, Ile575.C, Thr539.D, Asn572.D, Ile575.D                                                                                 |
|                                                                   | -16.8          | Met554.A, Ile557.A, Thr558.A, Ala561.A, Ile565.A, Pro424.D, Phe425.D, Leu428.D, Phe456.D, Val459.D, Leu460.D, Cys463.D, Met466.D, Thr479.D, Ile482.D, Gln483.D, Ile486.D, Phe487.D |
|                                                                   | -15.5          | Pro424.C, Phe425.C, Leu428.C, Phe456.C, Val459.C, Leu460.C, Cys463.C, Thr479.C, Ile482.C, Gln483.C, Ile486.C, Phe487.C, Met554.D, Ile557.D, Thr558.D, Ala561.D, Ile565.D           |
| TRPV6, [Incomplete helices and loops], Human 6bo9                 |                |                                                                                                                                                                                    |
| 6bo9_EC                                                           | -14.0          | Cys494.B, Met497.B, Ile501.B, Pro527.B, Met528.B, Phe531.B, Phe534.B, Phe553.C, Ser556.C, Ile557.C, Ile564.C                                                                       |
|                                                                   | -14.0          | Cys494.A, Met497.A, Ile501.A, Pro527.A, Met528.A, Phe531.A, Phe534.A, Phe553.B, Ser556.B, Ile557.B, Ile564.B                                                                       |
|                                                                   | -13.8          | Thr539.A, Ile540.A, Asp542.A, Ile575.A, Thr539.B, Ile540.B, Ile541.B, Asp542.B, Thr539.C, Ile540.C, Asp542.C, Thr539.D, Asp542.D, Ile575.D                                         |
|                                                                   | -13.8          | Ile341.B, Met345.B, Ile348.B, Tyr349.B, Ala498.C, Leu502.C, Tyr526.C, Pro527.C, Leu530.C                                                                                           |

| PDB <sup>a</sup>                                  | E <sup>b</sup> | Local Residues <sup>c</sup>                                                                                                      |
|---------------------------------------------------|----------------|----------------------------------------------------------------------------------------------------------------------------------|
|                                                   | -13.7          | Ile341.A, Ile348.A, Tyr349.A, Ala498.B, Leu502.B, Tyr526.B, Pro527.B, Leu530.B                                                   |
|                                                   | -13.7          | Ala498.A, Leu502.A, Tyr526.A, Pro527.A, Leu530.A, Ile341.D, Met345.D, Ile348.D, Tyr349.D                                         |
|                                                   | -13.4          | Cys494.C, Met497.C, Ala498.C, Ile501.C, Pro527.C, Met528.C, Leu530.C, Phe531.C, Phe534.C, Phe553.D, Ser556.D                     |
|                                                   | -14.1          | Phe553.A, Ser556.A, Ile557.A, Ile564.A, Cys494.D, Met497.D, Ile501.D, Pro527.D, Met528.D, Phe531.D, Phe534.D                     |
|                                                   | -13.8          | Ile341.B, Met345.B, Ile348.B, Tyr349.B, Ala498.C, Leu502.C, Tyr526.C, Pro527.C, Leu530.C                                         |
|                                                   | -13.7          | Ile341.C, Ile348.C, Tyr349.C, Ala498.D, Leu502.D, Tyr526.D, Pro527.D, Leu530.D                                                   |
| 6bo9_IC                                           |                | [none]                                                                                                                           |
| TRPV6, [Incomplete helices and loops], Human 6bob |                |                                                                                                                                  |
| 6bob_EC                                           |                | [none]                                                                                                                           |
| 6bob_IC                                           |                | [none]                                                                                                                           |
| TRPV6, plus 2-APB, Rat 6d7o                       |                |                                                                                                                                  |
| 6d7o_EC                                           | -13.6          | Ile334.B, Leu337.B, Cys341.B, Met344.B, Tyr348.B, Lys380.B, Leu383.B, Arg384.B, Gly387.B, Val390.B                               |
|                                                   | -13.6          | Ile334.C, Leu337.C, Cys341.C, Met344.C, Tyr348.C, Lys380.C, Leu383.C, Arg384.C, Gly387.C, Val390.C                               |
|                                                   | -13.6          | Phe552.B, Ser555.B, Ile556.B, Cys493.C, Met496.C, Ala497.C, Ile500.C, Pro526.C, Leu529.C, Phe530.C, Phe533.C                     |
|                                                   | -13.6          | Cys493.B, Met496.B, Ala497.B, Ile500.B, Pro526.B, Leu529.B, Phe530.B, Phe552.D, Ser555.D, Ile556.D                               |
|                                                   | -13.5          | Phe552.A, Ser555.A, Ile556.A, Cys493.D, Met496.D, Ala497.D, Ile500.D, Pro526.D, Leu529.D, Phe530.D                               |
|                                                   | -13.3          | Ile340.A, Tyr348.A, Trp461.A, Trp494.C, Val498.C, Leu501.C, Tyr525.C, Leu529.C                                                   |
|                                                   | -13.3          | Trp494.B, Val498.B, Leu501.B, Tyr525.B, Leu529.B, Ile340.C, Tyr348.C, Trp461.C                                                   |
|                                                   | -13.3          | Ile340.B, Tyr348.B, Trp461.B, Trp494.D, Val498.D, Leu501.D, Tyr525.D, Leu529.D                                                   |
|                                                   | -13.1          | Pro526.B, Met527.B, Phe530.B, Phe552.D, Ser555.D, Ile556.D, Ala559.D, Ile563.D                                                   |
|                                                   | -13.1          | Ile334.A, Leu337.A, Cys341.A, Met344.A, Tyr348.A, Leu383.A, Arg384.A, Gly387.A, Val390.A                                         |
|                                                   | -13.1          | Phe552.B, Ser555.B, Ile556.B, Ala559.B, Asp524.C, Pro526.C, Met527.C, Phe530.C                                                   |
|                                                   | -13.6          | Ile334.D, Leu337.D, Cys341.D, Met344.D, Tyr348.D, Leu383.D, Arg384.D, Gly387.D, Val390.D                                         |
|                                                   | -13.5          | Cys493.A, Met496.A, Ala497.A, Ile500.A, Pro526.A, Leu529.A, Phe530.A, Phe552.C, Ser555.C, Ile556.C                               |
|                                                   | -13.3          | Trp494.A, Val498.A, Leu501.A, Tyr525.A, Leu529.A, Ile340.D, Tyr348.D, Trp461.D                                                   |
|                                                   | -13.1          | Asp524.A, Pro526.A, Met527.A, Phe530.A, Phe552.C, Ser555.C, Ile556.C, Ala559.C, Ile563.C                                         |
|                                                   | -13.1          | Phe552.A, Ser555.A, Ile556.A, Ala559.A, Ile563.A, Asp524.D, Pro526.D, Met527.D, Phe530.D                                         |
| 6d7o_IC                                           | -15.5          | Trp494.B, Val498.B, Leu501.B, Phe328.C, Ala333.C, Val336.C, Ile340.C, Trp461.C, Val464.C, Phe467.C, Ala468.C, Phe471.C           |
|                                                   | -15.5          | Phe328.B, Ala333.B, Val336.B, Ile340.B, Trp461.B, Val464.B, Phe467.B, Ala468.B, Phe471.B, Trp494.D, Val498.D, Leu501.D           |
|                                                   | -15.5          | Phe328.A, Ala333.A, Val336.A, Ile340.A, Trp461.A, Val464.A, Phe467.A, Ala468.A, Phe471.A, Trp494.C, Val498.C, Leu501.C           |
|                                                   | -13.1          | Leu331.B, Ile334.B, Tyr338.B, Cys341.B, Val390.B, Ile397.B, Val401.B, Lys606.B                                                   |
|                                                   | -13.1          | Leu331.C, Ile334.C, Tyr338.C, Cys341.C, Val390.C, Ile397.C, Val401.C, Lys606.C, Leu607.C                                         |
|                                                   | -15.5          | Trp494.A, Val498.A, Leu501.A, Phe328.D, Ala333.D, Val336.D, Ile340.D, Trp461.D, Val464.D, Phe467.D, Ala468.D, Phe471.D           |
|                                                   | -13.1          | Leu331.D, Ile334.D, Tyr338.D, Cys341.D, Val390.D, Ile397.D, Val401.D, Lys606.D                                                   |
|                                                   | -13.1          | Leu331.A, Ile334.A, Tyr338.A, Cys341.A, Val390.A, Ile397.A, Val401.A, Lys606.A                                                   |
| TRPV6, Rat 6d7p                                   |                |                                                                                                                                  |
| 6d7p_EC                                           | -13.6          | Ile334.A, Leu337.A, Cys341.A, Met344.A, Tyr348.A, Lys380.A, Leu383.A, Arg384.A, Val386.A, Gly387.A, Val390.A                     |
|                                                   | -13.6          | Ile334.D, Leu337.D, Cys341.D, Met344.D, Tyr348.D, Lys380.D, Leu383.D, Arg384.D, Val386.D, Gly387.D, Val390.D                     |
|                                                   | -13.2          | Ile334.B, Leu337.B, Cys341.B, Met344.B, Tyr348.B, Lys380.B, Leu383.B, Arg384.B, Val386.B, Gly387.B, Val390.B                     |
|                                                   | -13.0          | Val336.B, Ile340.B, Met344.B, Val347.B, Tyr348.B, Trp461.B, Val464.B, Trp494.D, Val498.D, Leu501.D, Tyr525.D, Pro526.D, Leu529.D |

| PDB <sup>a</sup>            | E <sup>b</sup> | Local Residues <sup>c</sup>                                                                                                      |
|-----------------------------|----------------|----------------------------------------------------------------------------------------------------------------------------------|
|                             | -13.0          | Trp494.A, Val498.A, Leu501.A, Tyr525.A, Pro526.A, Leu529.A, Val336.D, Ile340.D, Met344.D, Val347.D, Tyr348.D, Trp461.D, Val464.D |
|                             | -13.0          | Val336.A, Ile340.A, Met344.A, Val347.A, Tyr348.A, Trp461.A, Val464.A, Trp494.C, Val498.C, Leu501.C, Tyr525.C, Pro526.C, Leu529.C |
|                             | -12.9          | Phe552.A, Ser555.A, Ile556.A, Cys493.D, Trp494.D, Ala497.D, Pro526.D, Phe530.D                                                   |
|                             | -12.9          | Cys493.A, Trp494.A, Ala497.A, Pro526.A, Phe530.A, Phe552.C, Ser555.C, Ile556.C                                                   |
|                             | -12.9          | Phe552.B, Ser555.B, Ile556.B, Cys493.C, Trp494.C, Ala497.C, Pro526.C, Phe530.C                                                   |
|                             | -13.6          | Ile334.C, Leu337.C, Cys341.C, Met344.C, Tyr348.C, Lys380.C, Leu383.C, Arg384.C, Val386.C, Gly387.C, Val390.C                     |
|                             | -13.0          | Trp494.B, Val498.B, Leu501.B, Tyr525.B, Pro526.B, Leu529.B, Val336.C, Ile340.C, Met344.C, Val347.C, Tyr348.C, Trp461.C, Val464.C |
|                             | -12.9          | Cys493.B, Trp494.B, Ala497.B, Pro526.B, Phe530.B, Phe552.D, Ser555.D, Ile556.D                                                   |
| 6d7p_IC                     | -15.4          | Phe328.B, Gly332.B, Ala333.B, Val336.B, Leu337.B, Ile340.B, Phe467.B, Ala468.B, Phe471.B, Trp494.D                               |
|                             | -15.4          | Trp494.A, Phe328.D, Gly332.D, Ala333.D, Val336.D, Leu337.D, Ile340.D, Phe467.D, Ala468.D, Phe471.D                               |
|                             | -15.4          | Phe328.A, Gly332.A, Ala333.A, Val336.A, Leu337.A, Ile340.A, Phe467.A, Ala468.A, Phe471.A, Trp494.C                               |
|                             | -15.4          | Trp494.B, Phe328.C, Gly332.C, Ala333.C, Val336.C, Leu337.C, Ile340.C, Phe467.C, Ala468.C, Phe471.C                               |
| TRPV6, plus 2-APB, Rat 6d7q |                |                                                                                                                                  |
| 6d7q_EC                     | -13.9          | Leu489.A, Cys493.A, Pro526.A, Met527.A, Phe530.A, Phe552.C, Ser555.C, Ile556.C, Ala559.C, Ile563.C                               |
|                             | -13.8          | Phe552.A, Ser555.A, Ile556.A, Ala559.A, Ile563.A, Leu489.D, Cys493.D, Pro526.D, Met527.D, Phe530.D                               |
|                             | -13.8          | Phe552.B, Ser555.B, Ile556.B, Ala559.B, Ile563.B, Cys493.C, Pro526.C, Met527.C, Phe530.C                                         |
|                             | -13.8          | Cys493.A, Met496.A, Ala497.A, Ile500.A, Pro526.A, Phe530.A, Phe533.A, Phe552.C, Ser555.C, Ile556.C                               |
|                             | -13.8          | Phe552.A, Ser555.A, Ile556.A, Cys493.D, Met496.D, Ala497.D, Ile500.D, Pro526.D, Phe530.D, Phe533.D                               |
|                             | -13.8          | Phe552.B, Ser555.B, Ile556.B, Cys493.C, Met496.C, Ala497.C, Ile500.C, Pro526.C, Phe530.C, Phe533.C                               |
|                             | -13.6          | Val336.B, Ile340.B, Trp461.B, Trp494.D, Ala497.D, Val498.D, Leu501.D, Pro526.D, Leu529.D                                         |
|                             | -13.5          | Val336.A, Ile340.A, Trp461.A, Trp494.C, Ala497.C, Val498.C, Leu501.C, Pro526.C, Leu529.C                                         |
|                             | -13.4          | Trp494.A, Val498.A, Leu501.A, Pro526.A, Leu529.A, Val336.D, Ile340.D, Trp461.D                                                   |
|                             | -13.8          | Cys493.B, Pro526.B, Met527.B, Phe530.B, Phe552.D, Ser555.D, Ile556.D, Ala559.D, Ile563.D                                         |
|                             | -13.8          | Cys493.B, Met496.B, Ala497.B, Ile500.B, Pro526.B, Phe530.B, Phe533.B, Phe552.D, Ser555.D, Ile556.D                               |
|                             | -13.3          | Trp494.B, Ala497.B, Val498.B, Leu501.B, Pro526.B, Leu529.B, Ile340.C, Trp461.C                                                   |
| 6d7q_IC                     | -16.4          | Val336.B, Ile340.B, Val464.B, Phe467.B, Ala468.B, Phe471.B, Leu474.B, Trp494.D, Val498.D                                         |
|                             | -16.4          | Trp494.A, Val498.A, Phe328.D, Val336.D, Ile340.D, Val464.D, Phe467.D, Ala468.D, Phe471.D, Leu474.D                               |
|                             | -16.4          | Val336.A, Ile340.A, Val464.A, Phe467.A, Ala468.A, Phe471.A, Leu474.A, Trp494.C, Val498.C                                         |
|                             | -16.4          | Trp494.B, Val498.B, Val336.C, Ile340.C, Val464.C, Phe467.C, Ala468.C, Phe471.C, Leu474.C                                         |
| TRPV6, Rat 6d7x             |                |                                                                                                                                  |
| 6d7x_EC                     | -14.3          | Phe552.A, Ser555.A, Ile556.A, Cys493.D, Met496.D, Ala497.D, Pro526.D, Met527.D, Phe530.D                                         |
|                             | -14.3          | Cys493.A, Met496.A, Ala497.A, Pro526.A, Met527.A, Phe530.A, Phe552.C, Ser555.C, Ile556.C                                         |
|                             | -14.3          | Phe552.B, Ser555.B, Ile556.B, Cys493.C, Met496.C, Ala497.C, Pro526.C, Met527.C, Phe530.C                                         |
|                             | -13.3          | Ile334.A, Leu337.A, Cys341.A, Met344.A, Tyr348.A, Lys380.A, Leu383.A, Val390.A                                                   |
|                             | -13.2          | Tyr376.A, Leu389.A, Ile392.A, Val393.A, Val396.A, Leu400.A, Met439.A, Leu443.A                                                   |
|                             | -13.2          | Tyr376.D, Leu389.D, Ile392.D, Val393.D, Val396.D, Leu400.D, Met439.D, Leu443.D                                                   |
|                             | -13.3          | Ile334.B, Leu337.B, Cys341.B, Met344.B, Tyr348.B, Lys380.B, Leu383.B, Val390.B                                                   |
|                             | -12.8          | Trp494.A, Ala497.A, Val498.A, Leu501.A, Tyr525.A, Pro526.A, Leu529.A, Val336.D, Ile340.D, Trp461.D                               |
|                             | -12.7          | Val336.B, Ile340.B, Trp461.B, Trp494.D, Ala497.D, Val498.D, Leu501.D, Tyr525.D, Pro526.D, Leu529.D                               |
|                             | -12.5          | Ile334.D, Leu337.D, Tyr338.D, Ile340.D, Cys341.D, Met344.D, Lys380.D, Leu383.D, Val390.D                                         |
|                             | -12.7          | Val336.A, Ile340.A, Trp461.A, Trp494.C, Ala497.C, Val498.C, Leu501.C, Tyr525.C, Pro526.C, Leu529.C                               |
|                             | -14.3          | Cys493.B, Met496.B, Ala497.B, Pro526.B, Met527.B, Phe530.B, Phe552.D, Ser555.D, Ile556.D                                         |
|                             | -13.2          | Tyr376.C, Leu389.C, Ile392.C, Val393.C, Val396.C, Leu400.C, Met439.C, Leu443.C                                                   |
|                             | -13.2          | Tyr376.B, Leu389.B, Ile392.B, Val393.B, Val396.B, Leu400.B, Met439.B, Leu443.B                                                   |

| PDB <sup>a</sup>                   | E <sup>b</sup>                                                                           | Local Residues <sup>c</sup>                                                                                                                                                                  |                                                                                                                                  |
|------------------------------------|------------------------------------------------------------------------------------------|----------------------------------------------------------------------------------------------------------------------------------------------------------------------------------------------|----------------------------------------------------------------------------------------------------------------------------------|
| 6d7x_IC                            | -12.7                                                                                    | Trp494.B, Ala497.B, Val498.B, Leu501.B, Tyr525.B, Pro526.B, Leu529.B, Val336.C, Ile340.C, Trp461.C                                                                                           |                                                                                                                                  |
|                                    | -12.5                                                                                    | Ile334.C, Leu337.C, Tyr338.C, Ile340.C, Cys341.C, Met344.C, Lys380.C, Leu383.C, Val390.C                                                                                                     |                                                                                                                                  |
|                                    | -14.6                                                                                    | Ala333.B, Val336.B, Leu337.B, Ile340.B, Val464.B, Phe467.B, Ala468.B, Phe471.B, Trp494.D                                                                                                     |                                                                                                                                  |
|                                    | -14.6                                                                                    | Phe328.A, Ala333.A, Val336.A, Leu337.A, Val464.A, Phe467.A, Ala468.A, Phe471.A, Trp494.C                                                                                                     |                                                                                                                                  |
|                                    | -14.6                                                                                    | Trp494.A, Phe328.D, Ala333.D, Val336.D, Leu337.D, Ile340.D, Val464.D, Phe467.D, Ala468.D, Phe471.D                                                                                           |                                                                                                                                  |
| -14.6                              | Trp494.B, Phe328.C, Ala333.C, Val336.C, Leu337.C, Val464.C, Phe467.C, Ala468.C, Phe471.C |                                                                                                                                                                                              |                                                                                                                                  |
| TRPV6, plus calmodulin, Human 6e2f |                                                                                          |                                                                                                                                                                                              |                                                                                                                                  |
| 6e2f_EC                            | -13.6                                                                                    | Met345.B, Ile348.B, Tyr349.B, Ala498.C, Leu502.C, Tyr526.C, Pro527.C, Leu530.C                                                                                                               |                                                                                                                                  |
|                                    | -13.6                                                                                    | Cys494.A, Ala498.A, Pro527.A, Leu530.A, Phe531.A, Phe534.A, Phe553.B, Ser556.B, Ile557.B, Ala560.B, Ile564.B                                                                                 |                                                                                                                                  |
|                                    | -13.5                                                                                    | Cys494.C, Met497.C, Ala498.C, Ile501.C, Pro527.C, Leu530.C, Phe531.C, Phe534.C, Phe553.D, Ser556.D, Ile557.D                                                                                 |                                                                                                                                  |
|                                    | -13.4                                                                                    | Cys494.B, Met497.B, Ala498.B, Ile501.B, Pro527.B, Met528.B, Leu530.B, Phe531.B, Phe534.B, Ser556.C, Ile557.C, Ile564.C                                                                       |                                                                                                                                  |
|                                    | -13.4                                                                                    | Met345.A, Ile348.A, Tyr349.A, Ala498.B, Leu502.B, Tyr526.B, Pro527.B, Leu530.B                                                                                                               |                                                                                                                                  |
|                                    | -13.4                                                                                    | Ala498.A, Leu502.A, Tyr526.A, Pro527.A, Leu530.A, Met345.D, Ile348.D, Tyr349.D                                                                                                               |                                                                                                                                  |
|                                    | -13.6                                                                                    | Ile341.C, Met345.C, Ile348.C, Tyr349.C, Ala498.D, Leu502.D, Tyr526.D, Pro527.D, Leu530.D                                                                                                     |                                                                                                                                  |
|                                    | -13.5                                                                                    | Phe553.A, Ser556.A, Ile557.A, Ile564.A, Cys494.D, Met497.D, Ala498.D, Ile501.D, Pro527.D, Met528.D, Leu530.D, Phe531.D, Phe534.D                                                             |                                                                                                                                  |
|                                    | 6e2f_IC                                                                                  | -15.9                                                                                                                                                                                        | Leu337.A, Trp462.A, Val465.A, Phe468.A, Ala469.A, Gly471.A, Phe472.A, Trp495.B, Leu496.B, Ala498.B, Val499.B, Leu502.B, Leu530.B |
|                                    |                                                                                          | -15.8                                                                                                                                                                                        | Trp495.A, Leu496.A, Ala498.A, Val499.A, Leu502.A, Leu530.A, Leu337.D, Trp462.D, Val465.D, Phe468.D, Ala469.D, Gly471.D, Phe472.D |
| -15.8                              |                                                                                          | Leu337.B, Trp462.B, Val465.B, Phe468.B, Ala469.B, Gly471.B, Phe472.B, Trp495.C, Leu496.C, Ala498.C, Val499.C, Leu502.C, Leu530.C                                                             |                                                                                                                                  |
| -15.6                              |                                                                                          | Phe425.B, Phe456.B, Val459.B, Cys463.B, Met466.B, Thr479.B, Ile482.B, Gln483.B, Ile486.B, Phe504.C, Met554.C, Ile557.C, Thr558.C, Ala561.C, Ile565.C                                         |                                                                                                                                  |
| -15.6                              |                                                                                          | Phe425.A, Phe456.A, Met466.A, Thr479.A, Ile482.A, Gln483.A, Ile486.A, Phe504.B, Met554.B, Ile557.B, Thr558.B, Ala561.B, Ile565.B                                                             |                                                                                                                                  |
| -16.4                              |                                                                                          | Phe425.C, Leu428.C, Phe456.C, Val459.C, Leu460.C, Cys463.C, Thr479.C, Ile482.C, Gln483.C, Ile486.C, Phe504.D, Met554.D, Ile557.D, Thr558.D, Ala561.D                                         |                                                                                                                                  |
| -16.4                              |                                                                                          | Leu337.C, Ile341.C, Trp462.C, Val465.C, Phe468.C, Ala469.C, Gly471.C, Phe472.C, Trp495.D, Leu496.D, Ala498.D, Val499.D, Leu502.D, Leu530.D                                                   |                                                                                                                                  |
| -15.4                              |                                                                                          | Phe504.A, Met554.A, Ile557.A, Thr558.A, Ala561.A, Ile565.A, Phe425.D, Phe456.D, Cys463.D, Met466.D, Thr479.D, Ile482.D, Gln483.D, Ile486.D                                                   |                                                                                                                                  |
| TRPV6, plus calmodulin, Rat 6e2g   |                                                                                          |                                                                                                                                                                                              |                                                                                                                                  |
| 6e2g_EC                            | -15.1                                                                                    | Ile340.A, Thr343.A, Met344.A, Val347.A, Tyr348.A, Trp461.A, Trp494.A, Ala497.B, Val498.B, Leu501.B, Tyr525.B, Leu529.B                                                                       |                                                                                                                                  |
|                                    | -15.0                                                                                    | Ile340.C, Thr343.C, Met344.C, Val347.C, Tyr348.C, Trp461.C, Ala497.D, Val498.D, Leu501.D, Tyr525.D, Leu529.D                                                                                 |                                                                                                                                  |
|                                    | -14.8                                                                                    | Ile340.B, Thr343.B, Met344.B, Val347.B, Tyr348.B, Trp461.B, Val464.B, Ala497.C, Val498.C, Leu501.C, Tyr525.C, Leu529.C                                                                       |                                                                                                                                  |
|                                    | -13.7                                                                                    | Cys493.C, Ala497.C, Pro526.C, Leu529.C, Phe530.C, Phe552.D, Ser555.D, Ile556.D                                                                                                               |                                                                                                                                  |
|                                    | -13.6                                                                                    | Cys493.B, Pro526.B, Phe530.B, Phe552.C, Ser555.C, Ile556.C, Ala559.C, Ile563.C                                                                                                               |                                                                                                                                  |
|                                    | -13.5                                                                                    | Phe552.A, Ser555.A, Ile556.A, Ala559.A, Ile563.A, Cys493.D, Met496.D, Ala497.D, Pro526.D, Leu529.D, Phe530.D, Phe533.D                                                                       |                                                                                                                                  |
|                                    | -15.2                                                                                    | Trp494.A, Ala497.A, Val498.A, Leu501.A, Tyr525.A, Leu529.A, Ile340.D, Met344.D, Val347.D, Tyr348.D, Trp461.D                                                                                 |                                                                                                                                  |
|                                    | -13.5                                                                                    | Cys493.A, Met496.A, Ala497.A, Pro526.A, Leu529.A, Phe530.A, Phe533.A, Phe552.B, Ser555.B, Ile556.B, Ala559.B, Ile563.B                                                                       |                                                                                                                                  |
| 6e2g_IC                            | -15.9                                                                                    | Pro423.C, Phe424.C, Ile427.C, Phe455.C, Val458.C, Leu459.C, Cys462.C, Met465.C, Arg469.C, Thr478.C, Ile479.C, Ile481.C, Gln482.C, Ile485.C, Phe503.D, Ile556.D, Thr557.D, Ala560.D, Ile564.D |                                                                                                                                  |
|                                    | -15.4                                                                                    | Pro423.B, Phe424.B, Ile427.B, Phe455.B, Val458.B, Leu459.B, Cys462.B, Met465.B, Thr478.B, Ile479.B, Ile481.B, Gln482.B, Ile485.B, Phe503.C, Ile556.C, Thr557.C, Ala560.C, Ile564.C           |                                                                                                                                  |
|                                    | -15.3                                                                                    | Phe415.A, Gly416.A, Gln417.A, Pro423.A, Val426.A, Phe455.A, Val458.A, Leu459.A, Phe486.A, Ile556.B, Thr557.B, Ala560.B                                                                       |                                                                                                                                  |
|                                    | -14.9                                                                                    | Phe503.A, Ile556.A, Thr557.A, Ala560.A, Phe415.D, Gly416.D, Gln417.D, Pro423.D, Val426.D, Phe455.D, Val458.D, Phe486.D                                                                       |                                                                                                                                  |
|                                    | -15.5                                                                                    | Pro423.A, Phe424.A, Ile427.A, Phe455.A, Val458.A, Leu459.A, Cys462.A, Met465.A, Thr478.A, Ile481.A, Gln482.A, Ile485.A, Phe503.B, Ile556.B, Thr557.B, Ala560.B, Ile564.B                     |                                                                                                                                  |

| PDB <sup>a</sup> | E <sup>b</sup> | Local Residues <sup>c</sup>                                                                                                                                    |
|------------------|----------------|----------------------------------------------------------------------------------------------------------------------------------------------------------------|
| -15.3            |                | Phe503.A, Ile556.A, Thr557.A, Ala560.A, Ile564.A, Phe424.D, Ile427.D, Phe455.D, Val458.D, Cys462.D, Met465.D, Thr478.D, Ile479.D, Ile481.D, Gln482.D, Ile485.D |
| -13.0            |                | Phe414.B, Phe415.B, Gly416.B, Gln417.B, Pro423.B, Val426.B, Phe455.B, Ile556.C                                                                                 |

- EC and IC refer to the extracellular and intracellular sides of the membrane respectively.
- Docking energies in kcal mol<sup>-1</sup>.
- Local residues within 4 Å of a cholesterol pose: residue numbers are given, together with subunit letter as given in the PDB file.
